# Supplementary material for: Maternal serum lipidomics identifies lysophosphatidic acid as a predictor of small for gestational age neonates
Source: Royal Society of Chemistry journal article supplement (doi:10.1039/d1mo00131k), 2021-09-14
Supplement: d1mo00131k1.xlsx [file d1mo00131k1.xlsx]

## Sheet: STable 1
Byeon et al. (2021) Maternal serum lipidomic identifies lysophosphatidic acid as a predictor of small for gestational age neonates
Supplementary Table S1. Relative peak area of lipids analyzed in the study
Lipid species	m/z	Retention time (min.)	Average fold-change (SGA/ Controls)	p-value	Control 1	Control 2	Control 3	Control 4	Control 5	Control 6	Control 7	Control 8	Control 9	Control 10	Control 11	Control 12	Control 13	Control 14	Control 15	Control 16	Control 17	Control 18	Control 19	SGA 1	SGA 2	SGA 3	SGA 4	SGA 5	SGA 6	SGA 7	SGA 8	SGA 9	SGA 10	SGA 11	SGA 12	SGA 13	SGA 14	SGA 15	SGA 16	SGA 17	SGA 18	SGA 19	SGA 20
14:0-LPC	468.308	9.273	1.12968	0.240837	0.5611	0.331201	0.5559	0.427371	0.153515	0.381472	0.480375	0.53858	0.5386	0.568937	0.516582	0.578987	0.356799	0.4503	0.394803	0.147449	0.4036	0.282117	0.508632	0.4932	0.669282	0.535604	0.4965	0.432743	0.484589	0.474212	0.416578	0.267822	0.7734	0.417096	0.541584	0.425627	0.8805	0.228905	0.402208	0.5811	0.394187	0.544899	0.262696
14:1-LPC	466.293	8.896	1.03568	0.717945	ND	0.168104	ND	0.235706	0.200117	0.332679	0.186348	0.0837659	ND	0.202022	0.225655	0.161749	0.155624	ND	0.169531	0.169725	ND	0.276441	0.245887	ND	0.261709	0.121141	ND	0.193022	0.231289	0.226612	0.203612	0.21922	ND	0.301647	0.188463	0.21643	ND	0.147235	0.186961	ND	0.209629	0.229194	0.185695
16:0-LPC	496.34	10.033	0.987298	0.899129	33.6525	17.8537	35.5087	24.8004	17.7606	20.6203	18.5651	13.2659	29.9741	18.5935	19.6092	23.4572	14.4228	23.5343	18.1829	21.2304	30.6502	20.891	20.1006	16.6799	22.5173	15.223	40.3562	18.7431	22.8355	18.9215	19.9598	19.7555	30.4863	20.4904	16.0349	17.7938	38.605	13.8658	17.696	33.4499	17.3354	19.8106	18.708
16:0e-LPC	482.361	10.518	1.02367	0.768209	0.2529	0.273868	0.2816	0.248689	0.255683	0.143563	0.164293	0.281784	0.3592	0.306609	0.309726	0.329381	0.275389	0.2008	0.222065	0.336441	0.1962	0.198471	0.203057	0.1498	0.307948	0.362818	0.2276	0.410731	0.28493	0.166677	0.276826	0.323116	0.2488	0.231059	0.253348	0.229445	0.3629	0.205835	0.208639	0.2484	0.280585	0.218759	0.216827
16:1-LPC	494.324	9.417	1.08045	0.552278	2.04565	1.04156	2.1603	1.4518	0.692258	1.08985	2.09206	1.63936	1.828	1.73178	1.93818	2.84184	1.21443	1.0114	0.858925	0.557573	1.8867	1.09141	0.926757	1.1253	2.29855	1.96993	1.5104	1.29056	1.87482	1.02714	2.44578	0.932109	2.5403	1.31638	1.79596	1.05098	2.1717	0.482717	1.47764	1.9043	1.05092	2.78177	0.911238
18:0-LPC	524.371	11.034	0.968698	0.596343	9.28545	6.91283	7.6669	7.71189	6.33148	6.10774	6.65944	7.70465	8.152	6.20106	7.98252	8.78768	6.5954	5.3575	6.78684	10.0234	8.8681	7.29073	7.92076	4.6174	7.66195	7.88465	9.5413	8.93701	7.6878	7.78318	7.40012	8.42505	7.344	6.02912	6.40832	6.28568	10.3339	6.02144	5.73577	9.2016	6.75143	5.06637	6.03202
16:0p-LPC	480.345	10.4365	0.968276	0.781925	0.2502	0.22844	0.1749	0.235372	0.294532	0.0513506	0.149669	0.281255	0.1983	0.259021	0.34189	0.316981	0.327878	0.1304	0.168375	0.37153	0.135	0.200928	0.168086	0.1226	0.242473	0.336203	0.1593	0.429501	0.316494	0.156151	0.241502	0.272036	0.1401	0.157435	0.197463	0.184775	0.2054	0.157658	0.166951	0.253	0.226538	0.190212	0.210732
18:0e-LPC	510.392	11.689	1.01627	0.9	0.0563	0.0537506	0.0455	0.0468218	0.0664096	0.0288165	0.0285478	0.0866319	0.0571	0.0643767	0.102766	0.0909471	0.093058	0.0313	0.059284	0.125327	0.0408	0.0587118	0.0722491	0.019	0.0675789	0.0953294	0.0505	0.111529	0.102638	0.0533484	0.0974687	0.0833162	0.0432	0.0697257	0.071276	0.0642933	0.0712	0.0403678	0.0403927	0.0464	0.0788823	0.0443441	0.0422254
18:1-LPC	522.355	10.194	1.0566	0.500938	12.5793	7.62227	14.3693	9.68025	9.6049	5.49162	9.56899	8.07802	12.2851	10.1743	11.4047	14.198	9.23202	6.7929	7.95574	6.65538	11.3811	8.87914	5.44469	7.5812	9.50064	11.0419	11.1809	10.6185	11.1404	8.33725	12.7475	12.5365	13.9367	7.90331	9.64766	8.08384	13.4683	5.40134	8.43145	12.8705	8.51414	10.3045	8.50669
18:1e-LPC	508.376	10.69	0.991052	0.928409	ND	0.129882	ND	0.158731	0.168062	0.0696053	0.0965968	0.175146	ND	0.141973	0.164706	0.146567	0.172319	ND	0.114107	0.206862	ND	0.120007	0.0914828	ND	0.16387	0.178458	ND	0.218689	0.158653	0.090544	0.138102	0.184942	ND	0.116383	0.130832	0.102906	ND	0.116338	0.122528	ND	0.130347	0.0959507	0.128472
18:2-LPC	520.34	9.638	1.04229	0.69264	17.034	10.7184	17.8315	9.07715	10.9498	8.37748	6.6859	6.84783	13.0717	9.48064	10.2435	13.7688	7.34568	11.4422	9.48601	11.2968	13.4657	10.9902	7.67362	8.4554	7.77379	8.52745	19.174	10.6948	10.6044	15.5688	9.56447	12.7972	11.3343	7.55156	8.67187	9.85912	19.8154	9.2881	6.82111	19.2585	10.088	8.75857	11.1723
18:3-LPC	518.324	9.263	1.13147	0.263638	0.4604	0.344134	0.3755	0.208234	0.183815	0.247308	0.332326	0.582365	0.3282	0.220666	0.264655	0.504554	0.176824	0.2569	0.326109	0.26221	0.4374	0.670105	0.305285	0.3286	0.412556	0.507472	0.4121	0.267635	0.280121	0.640139	0.326889	0.496352	0.2529	0.185861	0.475211	0.468486	0.4038	0.305174	0.318812	0.5043	0.413225	0.363898	0.362585
18:1p-LPC	506.361	10.5748	0.991487	0.945913	0.0256	0.0260935	0.0184	0.0306997	0.0298786	0.00674917	0.0172206	0.0385483	0.021	0.0297142	0.0340937	0.0314114	0.0394747	0.015	0.014537	0.0415575	0.0125	0.0207764	0.0153219	0.0104	0.0279247	0.0392098	0.0163	0.0518379	0.0327428	0.0209491	0.0222939	0.0288131	0.0143	0.0204254	0.0228509	0.0197998	0.0248	0.0234471	0.0214729	0.0219	0.0214186	0.0180749	0.0300788
20:0-LPC	552.402	12.271	1.00716	0.923785	0.0358	0.0322481	0.021	0.0324811	0.0230025	0.0225646	0.0264789	0.0354022	0.0225	0.0277111	0.0346515	0.0302667	0.0289955	0.0203	0.0260567	0.0508267	0.0205	0.0263081	0.0432721	0.0205	0.0360751	0.0326483	0.0283	0.0371389	0.0334944	0.0390888	0.0274398	0.0338922	0.0285	0.025558	0.0288198	0.0238655	0.0243	0.0350822	0.0237755	0.029	0.0321654	0.0231168	0.0313207
20:0e-LPC	538.423	13.004	1.10822	0.246554	0.0095	0.00763383	0.0102	0.00920821	0.0125585	0.00564203	0.00657383	0.0109694	0.0103	0.00846475	0.0126533	0.0115562	0.0104556	0.005	0.00816256	0.0145671	0.007	0.00529052	0.00870687	ND	0.0102012	0.0118183	0.0093	0.0135581	0.0119356	0.00602688	0.0113634	0.0134771	0.0075	0.00948535	0.00853565	0.00761447	0.0105	0.00756327	0.00785805	0.0106	0.0164706	0.0101257	0.00938789
20:1-LPC	550.387	11.172	1.02435	0.76541	0.1398	0.163707	0.1355	0.169765	0.186836	0.0632767	0.141524	0.218452	0.133	0.186289	0.1943	0.152055	0.148456	0.1118	0.124445	0.145551	0.0993	0.111977	0.0818874	0.1512	0.120058	0.182846	0.1321	0.160205	0.171998	0.100552	0.161847	0.192425	0.127	0.118119	0.189906	0.0920714	0.1313	0.171751	0.152775	0.1679	0.11847	0.0948245	0.182506
20:2-LPC	548.371	10.438	1.03231	0.719151	0.3963	0.533361	0.3914	0.344339	0.435943	0.189808	0.389328	0.572508	0.3872	0.606193	0.624297	0.796327	0.408311	0.3561	0.400852	0.44537	0.5219	0.320265	0.35059	0.3067	0.420837	0.565689	0.4041	0.490148	0.551134	0.444161	0.617816	0.468598	0.2458	0.304773	0.598798	0.469684	0.4592	0.406785	0.684977	0.4242	0.40121	0.410116	0.529594
20:3-LPC	546.355	9.907	0.94643	0.575282	5.5948	3.23447	4.9254	2.75042	3.51478	2.12201	3.32698	3.51759	5.2006	4.23284	4.37033	5.75235	2.78561	2.9345	2.81912	2.16585	5.418	2.15359	2.37112	1.8872	2.86341	4.21301	3.9447	3.01653	4.37683	3.4597	5.03053	3.61727	4.0671	2.26339	3.26836	2.66964	4.7996	1.94499	3.62184	3.1716	2.99744	3.8212	3.89602
20:4-LPC	544.34	9.45	0.961996	0.516702	7.53115	5.13098	6.01015	6.65263	5.84955	4.7279	4.75462	5.6374	6.6486	6.1208	6.37151	7.77615	5.31281	6.5482	4.44866	5.58502	6.747	6.6658	3.42817	3.9043	5.95385	6.29338	4.763	5.93025	7.35429	4.86582	5.93326	5.86404	7.6379	5.60339	4.27189	4.8755	6.816	4.54261	5.01785	7.3237	4.98945	5.77672	5.64349
20:5-LPC	542.324	9.113	1.06587	0.629961	0.5853	0.351656	0.2942	0.291102	0.36507	0.561124	0.415447	0.751228	0.32	0.350623	0.517219	0.600246	0.269991	0.1796	0.250428	0.210016	0.3207	0.342234	0.300091	0.4054	0.336577	0.734776	0.1398	0.330763	0.501715	0.35305	0.452125	0.238554	0.18	0.348846	0.449946	0.324625	0.7716	0.758974	0.355895	0.3075	0.405968	0.413705	0.353956
22:0-LPC	580.434	13.648	1.02748	0.762058	0.0062	0.00608915	ND	0.00432032	0.00308972	0.00471731	0.00378091	0.00554275	0.0052	0.00632872	0.00519207	0.0056573	0.00571338	0.0053	0.00451064	0.00912592	0.0056	0.00463453	0.0102774	ND	0.00676536	0.00583924	0.0062	0.00817695	0.00512743	0.00708143	0.00474293	0.00548785	0.0051	0.00850777	0.00478289	0.00528203	0.00535	0.00700945	0.00343733	0.0062	0.00578885	0.00355667	0.00540804
22:1-LPC	578.418	12.342	1.13845	0.600684	0.0227	0.00686829	0.0224	0.0206568	0.00747425	0.00424111	0.0263406	0.0427784	0.0104	0.0220856	0.0274265	0.0168486	0.0367165	0.0072	0.0228073	0.0122593	ND	0.0123227	0.00973719	0.0197	0.0149707	0.0215874	0.0119	0.0174599	0.0263886	0.0128092	0.0308151	0.0330164	0.0092	0.0246239	0.0895676	0.0165882	0.00735	0.019772	0.0140152	0.0067	0.0056366	0.00473275	0.0321963
22:2-LPC	576.402	11.502	0.934076	0.720584	ND	0.00428725	ND	0.00387011	0.00614096	0.00145909	0.00450763	0.0122725	ND	0.0136301	0.0112135	0.0129439	0.0103245	ND	0.00583203	0.00622072	ND	0.00455394	0.00538038	ND	0.00541017	0.0108789	ND	0.00871933	0.0100697	0.00398296	0.0146126	0.0081591	ND	0.00601849	0.00831375	0.00378222	ND	0.00375503	0.00582777	ND	0.00360096	0.00447343	0.00511377
22:3-LPC	574.387	10.732	1.02108	0.899503	0.0101	0.00701428	0.0124	0.00458652	0.0204725	0.00306712	0.0136244	0.0186468	0.0123	0.0285416	0.0186198	0.027438	0.0192662	0.0085	0.01349	0.00976893	0.0113	0.0090346	0.00836118	0.0075	0.016079	0.0271192	0.008	0.0241904	0.0160345	0.00691971	0.0288654	0.0164497	0.014	0.00817833	0.0127224	0.0083545	0.0085	0.00418928	0.0162376	0.0124	0.0108826	0.00885324	0.020251
22:4-LPC	572.371	10.207	1.01026	0.914826	0.4873	0.407527	0.452	0.475592	0.419546	0.251585	0.461843	0.327551	0.5348	0.498336	0.358172	0.555838	0.372705	0.2917	0.286074	0.27183	0.6984	0.283036	0.262078	0.2126	0.622172	0.547538	0.3999	0.513658	0.319164	0.326339	0.536524	0.404051	0.509	0.253327	0.290825	0.31857	0.3566	0.216792	0.493515	0.4886	0.380737	0.513469	0.480692
22:5-LPC	570.355	9.733	1.0464	0.633647	1.4124	1.23099	1.3204	1.10626	1.37704	0.851866	1.22982	1.359	1.8787	1.46502	1.28481	1.79976	1.07916	0.8718	0.921161	0.807341	2.1133	0.747385	0.732639	0.971	1.45236	1.84551	1.0434	1.7382	1.23452	0.848073	1.81966	1.17296	1.3524	0.694661	1.02876	0.893317	1.8723	0.94007	1.53816	1.6197	1.35257	1.18038	1.3844
22:6-LPC	568.34	9.501	0.982592	0.843763	4.4937	3.46018	3.474	3.85135	3.63409	2.30885	2.3956	3.40912	5.1829	2.92247	3.63314	3.29382	2.11058	2.3324	2.26977	3.03619	5.2049	2.74138	1.52289	2.4061	3.03764	3.38068	3.0497	3.73488	3.48017	2.27772	2.78968	3.69376	3.4404	2.69809	3.03284	2.66616	5.4779	3.28998	3.07553	3.9992	3.03448	2.01961	2.79508
24:0-LPC	608.465	15.169	1.05022	0.813384	0.0168	3.45265	0.0139	3.82102	3.57377	2.31119	2.38742	3.35095	0.0108	2.82425	3.62387	3.19873	2.11043	0.0128	2.26838	2.98334	0.0127	2.66623	1.44921	0.0091	2.99896	3.32091	0.0163	3.67167	3.37481	2.19508	2.74383	3.60364	0.0117	2.69283	2.94839	2.60808	0.0146	3.25745	3.06722	0.012	2.99785	2.01894	2.75425
24:1-LPC	606.449	13.631	1.12799	0.153652	0.0081	0.00748516	0.0082	0.0106066	0.00469235	0.00438156	0.00956272	0.0097277	0.0051	0.00762891	0.0100737	0.00558415	0.0072966	0.0061	0.00632522	0.0049655	0.0041	0.0048157	0.00735397	0.0088	0.00990056	0.00705576	0.0074	0.00880525	0.00994187	0.00650559	0.00739715	0.00697176	0.0087	0.0116749	0.0101173	0.00560334	0.0061	0.007515	0.00841859	0.0057	0.0063408	0.00534188	0.00856024
14:0e/16:0-PC	692.559	18.09	1.25891	0.20315	ND	2.03417	ND	1.21647	0.869452	0.870755	0.759353	0.632272	ND	0.827244	0.656961	1.10765	0.748687	ND	0.693373	0.584834	ND	0.605429	0.739883	ND	0.991154	2.97654	ND	1.53198	1.15966	1.06548	0.930847	0.87161	ND	1.03951	0.761506	0.790618	ND	0.71819	0.885899	ND	0.939671	1.04795	0.942835
14:0e/18:1-PC	718.575	18.399	1.1138	0.360722	1.174	1.24662	1.07471	1.17598	0.379043	0.422542	0.737573	1.20527	0.793161	0.888495	1.01671	0.960435	0.935365	1.37798	0.596734	0.753436	1.45395	0.882135	0.87814	0.545271	0.315914	2.35771	1.0451	0.751474	1.01062	1.09611	1.43076	1.13631	0.713008	1.48854	1.1656	0.599988	0.8879	1.17753	1.08151	0.934916	1.08916	1.26292	0.957369
14:0e/18:2-PC	716.559	18.096	1.15596	0.312482	0.980392	2.05861	1.40148	1.44571	0.848628	0.16311	0.924039	0.885206	0.932176	0.710743	0.815804	1.1874	1.10875	0.829315	0.479056	0.633612	0.607522	0.960535	0.62086	0.781099	0.53533	2.3332	1.08004	0.669773	1.90725	1.10837	1.2286	1.06509	1.13468	1.83762	1.02127	0.479851	1.15397	0.826784	0.807775	1.09932	0.817979	0.825612	0.693448
14:1e/18:2-PC	714.543	19.404	0.730743	0.389807	ND	5.09196	ND	0.94893	1.82639	0.133285	0.38332	0.787497	ND	0.860105	0.495328	1.02146	0.406715	ND	0.677786	0.321886	ND	1.89565	1.41497	ND	2.00435	0.716974	ND	1.25482	0.467806	0.772746	1.08646	1.18911	ND	0.689386	0.528664	0.781297	ND	0.253303	1.04851	ND	0.255465	0.704712	0.981109
14:1e/22:6-PC	762.543	18.624	0.329595	0.294816	ND	11.9821	ND	1.16737	0.902422	ND	ND	1.12613	ND	0.296752	0.362309	0.392336	0.390913	ND	0.341009	0.431553	ND	0.452232	0.93386	ND	1.15404	0.578353	ND	0.663152	ND	0.27359	0.565867	0.805994	ND	0.552226	0.369714	0.311832	ND	0.126091	0.589321	ND	0.255762	0.32598	0.649117
16:0/14:0-PC	706.538	16.89	1.12242	0.40401	ND	1.14652	ND	1.09779	0.340376	1.08099	1.19297	1.46452	ND	1.03534	0.951115	1.05861	0.998319	ND	0.964966	0.203797	ND	0.535141	1.09585	ND	0.619969	1.95728	ND	0.913106	1.38876	0.621163	1.59603	0.948714	ND	1.18152	1.11571	1.15893	ND	0.809068	0.450187	ND	1.03679	0.970854	1.06561
16:0/16:0-PC	734.569	18.681	1.00555	0.930347	1.09986	1.40781	1.1802	1.34463	0.871169	1.29103	1.01372	1.11683	0.910009	0.84981	1.02394	1.083	0.907899	0.93296	0.767895	0.603072	0.967528	0.790904	0.783847	0.987828	0.890543	1.54889	0.897404	1.06508	1.18935	0.977403	0.963832	0.916016	1.04127	1.15519	1.11103	0.979053	1.2107	0.897634	0.778332	0.772235	0.922534	0.803666	0.945891
16:0/16:1-PC	732.554	17.178	1.10129	0.473092	0.579873	0.937752	1.32441	1.34546	0.406993	1.15087	1.32227	1.24852	1.02697	0.757835	0.893236	1.58646	0.869911	0.743667	0.699855	0.231376	1.21276	0.740259	0.983299	0.834989	0.297306	2.19501	0.866814	0.712335	2.00639	0.588282	1.4608	0.939554	1.65092	0.87494	1.0907	0.879522	1.0923	1.36486	0.702614	0.667301	0.975299	0.975042	0.763248
16:0/18:1-PC	760.585	18.807	1.07296	0.624159	0.820268	1.78262	1.1026	1.78639	1.23848	1.34904	1.17757	0.920666	1.05974	0.793604	0.834262	1.06403	0.719704	0.753819	0.415034	0.275231	1.07373	0.495525	0.65242	0.777198	0.892738	2.80393	0.978247	1.01923	1.48884	1.27904	0.568373	0.83286	1.23564	0.924558	1.01747	0.722495	1.32288	1.02431	0.872206	0.875879	0.539435	0.824486	0.685459
16:0/18:2-PC	758.569	17.569	1.02458	0.818353	0.689439	1.91291	1.04495	1.47275	1.20033	1.25379	0.923571	0.987356	0.927881	0.656337	0.830917	1.03456	0.461483	0.87492	0.781436	0.938396	1.10078	0.79424	0.877408	0.731332	1.00723	2.05213	1.18748	1.01795	1.14702	1.31145	0.558611	0.648723	0.941163	1.00025	1.08442	1.05066	1.39949	0.718011	1.06863	1.10257	0.636803	0.763237	0.809392
16:0/18:3-PC	756.554	19.019	0.972404	0.777022	1.05624	1.29783	1.06043	1.40126	0.858739	1.00382	0.671912	ND	0.852406	ND	ND	ND	ND	0.767267	ND	ND	1.17	ND	ND	0.831442	0.64835	1.32459	1.22833	0.904028	0.916442	0.973025	ND	ND	0.868959	ND	ND	ND	1.15231	ND	ND	1.01262	ND	ND	ND
16:0/20:4-PC	782.569	17.335	0.976715	0.838214	1.14904	1.72798	0.968873	1.83921	1.22144	1.24776	0.969418	1.28165	0.966185	0.74416	0.753982	0.999104	0.579889	0.835618	0.61256	0.713818	1.06065	0.79478	0.763491	0.70204	1.07642	2.35046	0.910095	0.925748	1.26362	1.23349	0.634471	0.743156	1.12945	0.962707	0.897944	0.827901	1.20195	0.805025	0.861944	1.0761	0.688831	0.737277	0.741754
16:0/20:5-PC	780.554	17.613	1.16895	0.197942	0.992244	ND	1.01451	ND	ND	ND	ND	0.762967	0.760201	1.20573	0.806826	1.30215	0.922144	0.647876	0.610248	1.56934	0.950218	0.604788	0.725666	1.33025	ND	ND	0.510728	ND	ND	ND	0.88768	0.902452	0.878261	1.27139	1.15372	0.947327	2.03767	1.16484	1.37403	0.878037	0.953631	0.780556	1.05451
16:0/22:5-PC	808.585	18.2	1.03852	0.620258	0.931258	ND	0.905087	ND	ND	ND	ND	1.50351	1.08431	0.917419	0.84022	0.973816	0.916893	0.810298	0.888028	1.00891	1.13142	0.909703	0.905681	0.702651	ND	ND	0.732403	ND	ND	ND	0.967089	1.20627	1.44674	1.38207	1.05917	0.702916	1.16791	1.09149	1.05816	1.08793	0.876371	0.991171	0.801113
16:0/22:6-PC	806.569	17.047	0.968903	0.743916	1.05476	1.83138	0.879168	1.6155	1.20296	1.19758	0.745076	1.05481	1.09615	0.716201	0.860903	0.85666	0.6595	0.813174	0.825662	1.0373	1.18028	0.897794	0.783057	0.669767	1.0899	1.96588	0.867646	0.84221	0.676323	1.00612	0.842583	0.785595	0.953256	1.12716	1.14825	0.710209	1.38934	0.80807	1.17017	1.09647	0.886643	0.860866	0.795655
16:0e/16:0-PC	720.59	19.843	1.08872	0.174697	1.10599	1.34619	1.13594	1.08616	0.897196	0.848457	0.716684	0.955418	1.08609	0.951613	1.08873	0.994619	0.934785	0.928258	0.686133	0.926665	0.810427	0.91994	0.753857	0.617328	0.775999	1.34833	1.03722	1.39095	1.02925	0.937628	1.14594	1.03335	1.19919	1.4039	1.11807	0.847986	1.30855	0.892413	1.16032	0.771019	0.914086	0.945637	0.949685
16:0e/18:1-PC	746.606	19.91	1.08097	0.571905	0.637857	2.0184	1.06754	1.57791	1.234	0.907472	1.02417	1.2176	1.1491	0.497155	0.927687	0.839164	0.89285	0.951813	0.580685	0.549935	0.817829	0.681641	0.669703	0.648857	0.937617	2.6599	0.964801	1.1872	1.24248	1.29804	0.609373	0.998235	1.24283	1.13895	1.12257	0.752175	1.57668	0.698116	0.853294	0.942685	0.473656	0.730078	0.679956
16:0e/18:2-PC	744.59	18.775	1.17463	0.284545	0.422059	2.72094	0.854735	0.840126	0.863201	0.720414	0.481647	0.656846	1.2091	0.716158	0.636993	1.28043	0.572315	1.09994	0.739506	1.28793	0.696795	0.56843	1.07076	0.894884	2.16226	1.38086	1.32756	1.24303	0.9073	1.04185	0.571864	0.971822	0.562413	1.0343	0.830949	1.27251	1.65406	0.539856	1.31392	1.27845	0.693107	0.690835	1.18984
16:0e/20:4-PC	768.59	18.525	0.997472	0.981916	0.751794	2.15445	1.08257	1.43584	1.20771	1.17175	0.739791	1.21777	1.14767	0.80304	0.912494	1.0272	0.905621	0.898633	0.507326	0.887768	0.892546	0.639794	0.640892	0.655592	1.1465	1.92283	0.904103	1.1119	1.08242	0.945348	0.729528	0.729528	1.10228	1.27692	1.16269	0.623799	1.5713	0.74524	1.03901	0.993512	0.721441	0.749941	0.761461
16:0e/22:6-PC	792.59	18.233	1.0184	0.898435	1.09341	2.4256	0.592123	1.6602	1.36093	1.38815	0.700589	1.07897	1.48759	0.564506	0.674077	0.701405	0.614298	0.849715	0.651365	0.882115	0.670757	0.833601	0.59301	0.811415	1.48385	2.03696	0.758541	1.25687	0.775707	0.980589	0.866822	0.817502	0.955803	1.19907	0.89422	0.435925	1.83467	0.673251	1.12064	0.945973	0.79045	0.794106	0.745212
16:1/14:0-PC	704.522	15.432	1.14213	0.544525	0.563571	1.02973	1.07481	1.32283	0.149741	1.08478	1.77579	1.94298	0.921852	0.86826	0.865368	1.22888	0.887128	0.722314	0.528754	0.0732418	1.10401	0.4034	1.00888	ND	0.288333	2.22516	ND	0.586179	2.67589	0.384227	1.98085	0.974358	ND	0.811457	1.08941	0.783391	ND	0.808475	0.268025	ND	1.01146	1.24136	0.701652
16:1/16:1-PC	730.538	15.864	1.02482	0.849302	0.500059	1.88774	0.750149	0.98207	0.291916	1.4357	0.866009	1.36888	1.19368	0.663541	0.870404	0.891759	0.632117	1.3975	0.972457	0.695774	0.822544	0.75668	1.62946	ND	1.05084	1.85128	ND	0.873719	1.02446	0.608812	0.896772	0.852399	ND	1.04005	1.0091	1.5861	ND	0.709569	0.717266	ND	0.689853	1.08009	1.06518
16:1/18:2-PC	756.554	16.507	1.05696	0.714133	0.672888	1.52311	1.37804	0.842724	0.530123	1.96947	0.926865	1.69733	0.570444	0.441165	0.598193	0.94769	0.355589	1.29796	0.881283	0.687004	0.810036	0.806137	1.52474	0.577771	0.914015	2.51523	1.17765	1.07358	0.805953	0.938399	0.691391	0.555661	0.7333	0.668446	0.666606	1.48771	1.12032	0.946353	1.01215	1.66159	0.572702	1.53526	0.885126
16:1/20:4-PC	780.554	16.291	0.893745	0.611553	3.49543	1.45001	0.907908	1.11438	0.803252	2.5993	1.17858	1.88762	0.503747	0.55752	0.758919	0.992046	0.376599	0.743172	0.390447	0.263853	0.676889	0.529217	0.866092	0.413861	2.30889	2.24565	0.535433	1.0229	1.2094	0.770292	0.729364	0.89913	1.11969	0.553719	1.09472	0.848654	0.76629	0.815237	0.438055	0.837584	0.797321	0.945447	0.553403
16:1/20:5-PC	778.538	15.349	0.991587	0.96177	ND	1.55879	ND	1.18099	0.324753	1.05526	1.07603	2.43835	ND	0.76715	0.839669	0.797451	0.64955	ND	0.870504	0.617478	ND	0.569266	1.31594	ND	0.963591	2.24294	ND	0.759379	0.758391	0.517336	1.12397	0.922626	ND	1.08858	1.00522	0.804544	ND	0.749378	0.69314	ND	0.884275	1.37197	1.05348
16:1/22:6-PC	804.554	15.599	0.868611	0.603977	ND	2.10663	ND	1.56439	0.463156	1.23303	1.42546	3.07327	ND	0.503604	0.898658	0.640444	0.545632	ND	0.420398	0.547869	ND	0.540677	1.0576	ND	0.704975	3.20308	ND	0.594554	1.07661	0.655332	0.968131	1.05695	ND	0.647206	1.01913	0.397369	ND	0.55932	0.449186	ND	0.820307	1.16383	0.663202
16:1/24:2-PC	840.648	20.935	1.19588	0.48133	ND	0.904776	ND	1.33431	0.509006	0.521492	1.89901	2.17434	ND	0.608375	0.750705	0.625387	0.965174	ND	0.86193	0.40798	ND	0.510477	0.639079	ND	1.79475	1.85095	ND	0.379366	0.369646	2.12995	0.566683	0.72021	ND	0.525314	0.819998	0.641231	ND	0.853819	1.35923	ND	0.613658	3.06125	0.601906
16:1e/16:0-PC	718.575	19.59	1.05602	0.565706	1.08019	1.25169	1.31587	1.05937	0.867594	0.21966	0.726495	1.39019	1.01368	0.676673	1.28378	1.16698	1.29094	0.786862	0.642897	1.05081	0.837341	0.880223	0.92817	0.534125	0.650282	1.28564	1.12282	1.0507	1.24154	0.917675	1.35411	0.959048	1.18558	1.73187	1.33427	0.665124	1.29609	0.97647	0.994453	0.82745	0.739345	0.842301	0.821718
16:1e/16:1-PC	716.559	18.061	1.17575	0.203621	0.980392	ND	1.40148	ND	ND	ND	ND	0.95164	0.932176	0.775368	0.929071	1.23914	1.26708	0.829315	0.536475	0.652778	0.607522	0.962581	0.768387	0.781099	ND	ND	1.08004	ND	ND	ND	1.3105	1.41057	1.13468	2.24896	1.1632	0.519095	1.15397	0.901474	0.909022	1.09932	0.909244	0.825828	0.719579
16:1e/18:1-PC	744.59	19.716	1.15403	0.629567	ND	0.201901	ND	0.0621858	0.0430374	0.031582	0.027029	1.71529	ND	1.22632	1.36921	2.06425	1.70752	ND	1.05412	1.26881	ND	0.958867	1.23682	ND	0.305281	0.0802366	ND	0.0977134	0.046425	0.0737588	1.31833	1.97525	ND	3.00001	1.72647	1.01728	ND	1.46755	1.72703	ND	0.991407	1.21524	0.991062
16:1e/18:2-PC	742.575	18.504	1.03658	0.732099	0.827045	1.79732	1.29191	1.07538	1.15927	0.232239	0.883571	0.987158	0.836636	0.826717	1.11621	0.955292	0.912171	1.35805	0.590417	1.32517	0.703778	0.750152	1.02167	0.570216	0.93815	1.76097	1.0867	1.03757	0.943114	1.02472	0.669534	0.90911	0.910258	1.55463	1.3954	1.14542	1.15411	0.645253	1.16989	1.2613	0.660817	0.664029	0.848659
16:1e/20:4-PC	766.575	18.23	1.00934	0.937682	0.69072	1.88591	1.17615	1.57928	1.51379	0.268319	0.768329	1.31878	1.03901	0.558611	1.00225	0.828863	1.0976	0.916319	0.620319	1.15467	0.818692	0.885211	0.786572	0.692612	0.979375	1.73091	0.933337	0.938001	1.10098	0.92699	0.795509	0.709723	1.10559	1.77455	1.3521	0.586772	1.49157	0.751237	1.01428	1.136	0.726567	0.68047	0.664022
16:1e/22:6-PC	790.575	17.866	1.01457	0.919827	0.69013	2.20361	0.950649	1.72049	1.44708	0.262574	0.78846	1.62779	1.40484	0.525021	1.02831	0.762545	0.871975	0.828254	0.550376	0.9278	0.89068	0.735319	0.643158	0.665552	1.20183	1.88062	0.822355	1.10206	0.887489	0.975909	0.713942	0.771169	0.952615	1.85907	1.17578	0.439869	1.78578	0.726941	0.984557	1.00914	0.772837	0.727175	0.686242
16:2e/22:6-PC	788.559	18.259	0.999742	0.998695	ND	1.13418	ND	1.21912	1.0626	0.153614	0.410991	0.806156	ND	0.826174	1.04857	1.12406	1.30876	ND	0.741453	2.20073	ND	1.21569	0.749752	ND	0.636438	1.08565	ND	0.717065	0.795439	0.841937	1.0011	0.855485	ND	1.96461	1.39639	0.820497	ND	0.89062	1.44583	ND	0.951344	0.769856	0.82587
18:0/18:1-PC	788.616	20.469	1.08257	0.486044	0.631648	1.12203	1.08052	1.34879	0.901513	1.26907	1.60213	1.2222	1.16714	0.705958	0.764723	1.10001	0.861135	0.660186	0.787872	0.404623	1.22097	0.597427	0.780195	0.740432	0.611623	2.30358	0.892842	0.905652	1.27727	0.752025	0.993422	1.0012	1.59453	1.26668	0.915505	0.918255	1.29521	1.15171	1.08699	0.716513	0.596433	1.00077	0.751215
18:0/18:2-PC	786.601	19.35	0.956734	0.636697	1.02507	1.83354	1.06271	1.34707	1.05116	1.38726	0.825573	1.05532	0.877833	0.629206	0.751048	0.957399	0.703564	0.906723	0.880061	1.20401	1.09472	0.949342	0.889521	0.685147	1.19064	1.78338	1.16425	1.01178	1.01502	1.00319	0.543413	0.653967	0.86578	1.13979	0.923604	1.25175	1.29321	0.707497	1.2225	1.02456	0.548141	0.726078	0.815166
18:0/20:4-PC	810.601	19.134	0.915437	0.405782	1.00092	1.79526	0.940248	1.81556	1.11071	1.37041	1.15942	1.29339	0.922674	0.593491	0.74969	0.783877	0.80233	0.862887	0.692097	1.06275	1.1391	0.951834	0.814652	0.583908	1.1772	1.92605	0.917116	0.909963	0.99319	0.989481	0.769811	0.770689	1.18862	1.16198	0.999634	0.863318	1.23586	0.691529	1.01627	1.20867	0.611398	0.529295	0.594722
18:0/22:6-PC	834.601	19.774	0.848505	0.667902	1.0248	3.83777	0.693218	3.7051	2.11008	2.73825	1.94125	0.141972	1.25221	0.144378	0.121069	0.13152	0.101327	0.703005	0.133042	0.138003	1.41617	0.116606	0.150678	0.603672	2.98501	4.29608	0.765084	1.8924	1.04684	1.86251	0.0740359	0.121443	0.958841	0.115515	0.164826	0.198405	1.54458	0.125738	0.226152	1.03841	0.123132	0.153999	0.102878
18:0e/16:0-PC	748.621	21.385	1.02605	0.749215	1.26109	0.872958	0.99493	0.658571	0.935994	0.707636	0.601336	1.29604	1.14385	0.928792	1.16204	1.12113	1.4206	0.833333	0.869518	0.881333	1.08048	0.688961	1.29094	0.491128	0.748773	0.847732	1.0076	1.26367	0.719866	0.665981	1.23689	1.37312	1.08048	1.3519	1.14844	0.852081	1.36565	1.1716	1.14763	0.741445	0.816876	1.1433	1.0763
18:0e/18:1-PC	774.637	21.507	1.1494	0.15571	1.03815	1.18113	1.20071	0.65386	0.873404	0.482316	0.698913	1.15493	1.12506	0.80943	1.06321	1.24505	1.34951	0.820859	0.815241	0.798856	0.754869	0.587779	0.994654	0.593916	0.64632	1.73403	0.904555	1.13927	0.836907	0.802328	0.904144	1.17819	1.20393	1.78535	1.19002	0.70437	1.50974	1.12599	1.49425	0.848221	0.833754	1.12115	0.795643
18:0e/18:2-PC	772.621	20.114	1.05723	0.673851	1.61663	2.57899	0.875511	0.758951	0.981215	0.864179	0.488515	1.50212	1.00833	0.67823	1.06308	0.997849	0.947943	0.914807	0.568843	0.67283	0.674316	0.517603	0.748356	0.653882	1.32534	1.4417	0.902232	1.63662	0.915032	0.840248	0.696848	1.05328	1.10971	1.44913	1.18996	0.70896	1.31248	0.799623	1.26088	0.932097	0.603791	1.02361	0.686286
18:0e/20:4-PC	796.621	20.177	1.00951	0.923473	1.04343	1.68559	1.06143	1.18864	1.23557	1.0212	0.634336	1.48047	1.13005	0.63159	0.820278	0.988448	0.997757	0.784512	0.645634	1.13118	0.978463	0.621788	0.827438	0.480052	0.881726	1.67685	0.937625	1.32205	1.03124	0.8185	0.785355	0.768522	1.12145	1.61231	1.17637	0.540417	1.47699	0.922778	1.15066	0.985995	0.755546	0.807453	0.840305
18:0e/22:1-PC	830.7	24.02	1.25449	0.0704006	0.649119	0.605212	0.755599	0.736683	0.883688	0.606888	1.19048	1.47133	1.24429	0.562557	1.66211	0.955305	0.925466	0.839209	0.638106	0.66046	ND	0.511948	0.554422	ND	0.872457	1.93512	1.10058	1.36879	1.02801	1.71837	1.01522	1.11888	0.839581	1.27049	1.5951	0.723906	1.01947	0.949112	0.534211	0.467439	1.00381	1.16424	0.737627
18:0e/22:6-PC	820.621	19.9	1.02735	0.805532	0.563571	1.80428	1.07481	1.16198	1.29484	1.08494	0.62488	1.45772	0.921852	0.568549	0.73902	0.874499	0.73631	0.722314	0.790185	1.16299	1.10401	0.642419	0.808651	0.649745	1.02148	1.66114	0.678824	1.39871	0.713796	0.856564	0.982899	0.780919	0.613602	1.62309	0.999882	0.472609	1.15818	0.799845	1.29638	1.26548	0.821317	0.9193	0.900808
18:1/18:2-PC	784.585	18.139	0.946775	0.686505	2.25406	1.78798	0.971318	1.44188	1.05507	1.47371	1.11672	0.987163	0.811341	0.712469	0.829119	0.906854	0.619254	0.763212	0.755882	0.744464	0.682926	0.60887	1.01085	0.683647	0.763663	2.5025	1.01979	0.900754	1.2543	1.21174	0.659935	0.699443	0.739943	0.791159	1.12089	1.00918	0.924674	0.920477	0.96942	1.14909	0.605973	0.809613	0.730659
18:1/20:4-PC	808.585	17.542	0.985646	0.944732	1.36371	2.13097	0.724102	2.14033	1.56746	1.32712	1.60911	0.837753	1.2038	0.602549	0.559269	0.654296	0.600204	0.767558	0.46536	0.485904	1.09322	0.497636	0.510553	0.758028	1.04581	3.74386	0.716214	1.165	1.61317	1.55286	0.640326	0.797599	1.14133	0.71995	0.722773	0.320095	1.22249	0.571091	0.581628	1.00955	0.53777	0.52465	0.474902
18:1/22:6-PC	832.585	17.256	1.01513	0.894312	0.60499	2.03756	0.942427	1.69875	0.954629	0.869375	0.765944	1.17418	0.853422	0.753576	0.888779	0.74996	0.752469	0.991895	0.861589	1.35609	1.06022	0.829544	0.708311	0.795421	0.996349	2.02184	0.855724	0.739587	0.66327	0.948627	0.818204	0.901669	1.06444	1.32741	1.11346	0.514286	1.39003	0.735214	1.21083	1.44144	0.915058	0.926395	0.767049
18:1e/18:2-PC	770.606	19.241	1.03875	0.762005	1.28149	1.96138	0.577768	0.809771	1.15651	0.78622	0.900917	1.31299	1.21331	0.917377	1.01618	1.08612	0.736923	1.17865	0.922111	0.796392	0.628611	0.507122	0.840011	0.614745	0.803069	2.35158	1.24682	1.15203	1.26037	1.12778	0.541269	0.838336	0.471458	0.975409	1.21949	0.606278	1.33002	1.01902	1.25467	1.45713	0.450617	0.925791	0.724284
18:1e/20:4-PC	794.606	18.705	1.03245	0.747998	0.838991	1.70795	0.855549	1.48899	1.26831	0.963689	0.681422	1.22555	1.10709	0.664333	0.888187	0.863315	0.960951	1.00698	0.705173	1.00568	0.858711	0.947549	0.650566	0.685749	1.16002	2.02361	0.919751	0.826558	0.836991	1.05393	0.748643	0.811666	1.00834	1.3634	1.1789	0.678209	1.48839	0.745513	1.20319	1.23045	0.791618	0.819756	0.736338
18:1e/22:6-PC	818.606	18.383	1.0452	0.724397	0.871869	1.91398	0.680111	1.63622	1.33516	1.09164	0.791226	1.3814	1.47421	0.556844	0.759497	0.678088	0.754801	0.921429	0.623556	0.911887	0.785712	0.795203	0.606741	0.698029	1.27446	2.12645	0.763982	1.03513	0.627066	1.03057	0.894394	0.784616	0.961839	1.40071	1.05084	0.573778	1.70714	0.647007	1.28853	1.13568	0.787898	0.901195	0.74113
18:2/18:2-PC	782.569	16.6	0.959603	0.71051	0.938889	1.42207	1.3634	1.45357	0.756776	1.39619	0.81328	1.92537	0.786831	0.534402	1.0826	1.35211	0.844403	0.836572	0.564065	0.715135	0.852531	0.779476	0.984267	0.777814	1.05846	1.96537	1.24571	0.55578	0.876264	0.805226	0.831643	0.753703	0.862352	1.14695	1.39555	0.748071	1.0161	1.05667	0.823065	1.3198	0.703391	0.711871	0.944261
18:2/22:6-PC	830.569	16.058	0.859988	0.295364	ND	1.79502	ND	1.50511	1.01549	0.985757	1.15153	2.02207	ND	0.555654	1.1492	0.811797	0.709378	ND	0.719251	0.990029	ND	0.651203	1.03155	ND	1.58247	1.3611	ND	0.976967	0.779156	1.14499	0.98681	0.623691	ND	1.22876	1.16637	0.789416	ND	0.462894	0.833386	ND	0.635576	0.686692	0.64868
18:2e/22:6-PC	816.59	18.068	1.07198	0.684629	ND	1.57577	ND	1.52655	0.911643	0.0813873	0.450612	1.36772	ND	0.654507	1.1576	0.819384	1.12107	ND	0.485005	1.56367	ND	1.03253	0.750014	ND	0.913887	1.59275	ND	0.548517	0.405041	1.02798	1.05131	0.904153	ND	2.13786	1.38197	0.728082	ND	0.636739	1.45299	ND	1.1064	0.890219	0.724624
18:3/22:6-PC	828.554	17.078	1.03041	0.836303	ND	1.29024	ND	1.28716	1.04272	0.80793	0.432735	0.451198	ND	0.989291	0.82472	0.878116	0.829749	ND	0.722307	2.02994	ND	1.35074	0.846354	ND	0.850543	1.57665	ND	0.678883	0.472759	0.899794	1.16498	0.811988	ND	1.41187	1.27764	0.887867	ND	0.903318	1.78676	ND	0.908655	0.710575	0.874517
20:0/18:2-PC	814.632	20.748	1.04253	0.833209	ND	1.4612	ND	0.850687	0.628946	0.960235	1.27764	1.67033	ND	0.726063	0.873693	1.10925	0.757378	ND	0.617991	0.599503	ND	0.546934	1.61877	ND	0.829425	3.24765	ND	0.704371	0.660075	0.794797	0.80916	0.734521	ND	1.12941	1.14963	1.09205	ND	1.03666	0.818808	ND	0.550485	0.985781	0.758556
20:0/20:4-PC	838.632	20.239	1.08547	0.683282	ND	1.57562	ND	1.52603	0.861774	1.11968	1.85473	1.27565	ND	0.634519	0.619314	0.817677	0.720533	ND	0.494086	0.463425	ND	0.53718	0.907031	ND	0.601046	2.98529	ND	0.891386	1.17061	0.902764	1.16275	1.00837	ND	1.58846	0.779691	0.769086	ND	1.22478	0.796175	ND	0.447178	0.720064	0.54509
20:1/18:2-PC	812.616	19.779	0.930009	0.615699	0.59786	2.02131	1.05417	1.50138	0.91496	1.80896	1.39716	1.43788	1.19666	0.595045	0.793318	0.666149	0.581452	0.81242	0.681169	0.509235	1.52932	0.510803	1.0981	0.483258	0.937104	2.46408	1.18516	0.969079	1.00514	1.08362	0.447658	0.661896	1.07443	1.0435	0.994703	1.12322	1.27816	0.81363	1.05784	0.788566	0.551679	0.804532	0.525396
20:1/20:4-PC	836.616	19.291	0.99473	0.976628	0.86742	1.96875	0.697515	1.87662	1.34829	0.97444	1.7702	1.11768	1.24337	0.550422	0.581585	0.66985	0.643861	0.772144	0.551873	0.606573	1.40532	0.550824	0.854745	0.855855	0.777221	3.52207	0.81712	1.03608	1.02512	1.24348	0.86098	0.941105	1.01381	1.13116	0.703405	0.639621	1.38223	0.710244	0.695787	0.945217	0.525516	0.631887	0.4906
20:1e/20:4-PC	822.637	20.189	1.0876	0.466801	0.965842	1.47781	1.02322	1.13722	1.40497	0.807372	0.98587	1.45198	1.04867	0.569256	1.04524	0.722579	1.02076	0.780045	0.565993	0.904439	0.929747	0.765245	0.576928	0.611725	0.814103	2.40283	1.01448	1.14668	1.10401	1.06467	0.804019	0.743447	0.974961	1.41582	1.30684	0.577742	1.61974	0.805197	1.19231	1.03157	0.655883	0.82493	0.705837
22:5/18:2-PC	832.585	17.51	0.956112	0.858915	0.603474	0.497469	0.942146	0.206113	0.150425	0.314346	0.280209	2.02884	1.03358	0.665734	0.685485	0.74677	1.93253	0.878198	1.7604	3.02917	1.18849	2.0153	0.478791	0.751208	0.450485	0.504849	1.09044	0.183922	0.168708	0.212079	0.964129	0.555457	1.09546	1.94935	0.997347	0.701638	1.15494	0.737387	3.67322	1.26207	1.23418	0.420265	1.45539
16:0-LPE	452.278	10.091	0.919077	0.53646	1.9298	1.46042	2.0946	1.51562	0.91857	1.14211	1.90873	4.44768	1.7368	1.46786	2.52784	2.76697	1.42971	0.7219	1.45298	0.823772	1.264	0.862929	1.27686	0.8963	1.10745	1.42441	1.4026	0.978428	1.64463	1.29819	1.99777	1.67307	1.5428	1.79747	2.3528	1.61134	2.1084	1.77228	1.4534	1.56	1.14504	1.56726	1.38207
16:1-LPE	450.263	9.465	0.935395	0.755553	0.1147	0.0264288	0.0758	0.0550222	0.015055	0.040062	0.127904	0.154455	0.0721	0.0754309	0.111229	0.175413	0.0625241	0.0247	0.0486964	0.00568196	0.0523	0.0253552	0.0400035	0.0435	0.0102602	0.0524786	0.0614	0.0356275	0.169156	0.0286763	0.0989865	0.0577325	0.1155	0.0601337	0.0818499	ND	0.0527	0.100034	ND	0.0269	0.0540906	0.0590634	0.0464601
16:1e-LPE	436.283	10.51	0.807611	0.30595	ND	0.344761	ND	0.23472	0.295145	0.022012	0.100837	0.543504	ND	0.441452	0.430018	0.839558	0.260062	ND	0.229342	0.262789	ND	0.23328	0.249743	ND	0.29192	0.160297	ND	0.261693	0.170569	0.205234	0.224197	0.524554	ND	0.339677	0.32191	0.275774	ND	0.245244	0.253156	ND	0.151659	0.260569	0.196332
18:0-LPE	480.31	11.122	0.844041	0.249104	1.5586	1.33831	1.7064	1.25631	0.882017	1.12183	1.71953	4.23629	1.6457	0.969979	2.07448	2.09989	1.2642	0.4696	1.26441	1.24626	0.9846	0.976302	1.21747	0.6405	1.08355	1.15422	0.9514	0.878551	1.19161	0.955248	1.47606	1.53898	0.9711	1.65006	1.90785	1.7382	1.5067	1.62709	1.24514	1.1071	0.850129	1.29539	1.1367
18:1-LPE	478.294	10.255	0.890459	0.403708	0.9792	0.699618	1.5343	0.68401	0.537251	0.482973	0.95791	1.94333	0.7366	0.659566	1.21182	1.42408	0.669316	0.3276	0.694947	0.538657	0.5384	0.431361	0.545343	0.6054	0.519549	0.466304	0.8255	0.44531	0.79241	0.67852	0.665101	0.86312	0.8348	0.7509	1.09862	0.920837	0.9739	0.846161	0.730679	0.7462	0.485816	0.861129	0.50853
18:1e-LPE	464.315	11.625	0.819611	0.385414	ND	0.325535	ND	0.173724	0.254397	0.0222931	0.0820157	0.484278	ND	0.33581	0.265016	0.662427	0.315224	ND	0.180359	0.224485	ND	0.133312	0.210225	ND	0.263682	0.0917635	ND	0.226462	0.100126	0.154018	0.156419	0.583413	ND	0.309953	0.199168	0.205351	ND	0.172774	0.274314	ND	0.118948	0.185132	0.180514
18:2-LPE	476.278	9.696	1.13581	0.645329	1.3466	0.271974	1.4773	0.169213	0.170811	0.498671	0.208404	ND	0.9523	0.354509	0.586765	1.0326	ND	0.4631	0.739309	0.495351	0.7316	0.842628	0.752682	0.5579	0.200023	0.115724	1.3299	0.196846	0.221144	0.223208	0.778763	0.591423	0.7963	0.663325	1.08859	3.45046	1.3683	0.439184	0.488562	1.0581	0.271402	0.556261	0.428683
18:2e-LPE	462.299	10.676	0.917782	0.652539	ND	0.120871	ND	0.0998119	0.128929	0.00736692	0.0607622	0.237283	ND	0.170257	0.153	0.236923	0.102694	ND	0.081196	0.117235	ND	0.0756744	0.0644634	ND	0.164421	0.0648813	ND	0.101685	0.0531281	0.109619	0.0794224	0.233624	ND	0.145239	0.119417	0.128613	ND	0.0847101	0.133731	ND	0.0562495	0.0878732	0.066252
18:3-LPE	474.263	9.307	1.02884	0.883709	0.0369	0.0382852	0.03	0.0241078	0.0193404	0.03216	0.0518037	0.127057	0.0359	0.0221831	0.0349322	0.0747332	0.0246982	0.0127	0.0390692	0.019574	0.021	0.0211803	0.0459201	0.0329	0.0344743	0.0187961	0.0459	0.0368465	0.045841	0.0383631	0.0450962	0.0370053	0.0252	0.0360377	0.0309731	0.110255	0.0321	0.0363333	0.0325058	0.0395	0.0160936	0.0507651	0.0256066
20:1-LPE	506.325	11.252	0.881702	0.531492	ND	0.0304814	ND	0.0215368	0.0172282	0.0117514	0.0290785	0.0823224	ND	0.0261951	0.0466416	0.0342923	0.0236396	ND	0.0232	0.0206159	ND	0.0192975	0.0170057	ND	0.0243701	0.0218321	ND	0.0104709	0.0148371	0.0311306	0.0156127	0.0301112	ND	0.0249851	0.0438294	0.022639	ND	0.0320961	0.0269368	ND	0.0191011	0.0443064	0.0187184
20:3-LPE	502.294	9.969	0.868054	0.443814	0.0972	0.0656517	0.145	0.0456407	0.0500596	0.0886892	0.0481878	0.287071	0.1582	0.125753	0.184265	0.245565	0.100413	0.0674	0.122337	0.0435774	0.1032	0.0493979	0.0760702	0.0737	0.0308564	0.0336926	0.1177	0.0287127	0.0405151	0.0360581	0.124489	0.131905	0.1092	0.0970744	0.176675	0.174199	0.1212	0.14533	0.111266	0.101	0.0625008	0.127501	0.0786423
20:4-LPE	500.278	9.518	0.86501	0.433263	1.3937	0.654911	1.4608	0.622312	0.3936	1.57057	0.508149	1.28058	1.5993	0.590279	0.690729	0.890687	0.768051	0.8449	0.409047	0.350597	1.134	0.369031	0.679245	0.9061	0.456018	0.271139	0.9273	0.336942	0.345107	0.360392	0.646441	0.808325	1.4129	0.630816	0.728613	0.486328	1.972	0.556204	0.547474	1.879	0.524872	0.499207	0.465077
20:5-LPE	498.263	9.158	0.922549	0.801031	0.0869	0.0562056	0.0576	0.0332417	0.0356184	0.37289	0.0493252	0.147263	0.0959	0.0531111	0.0628505	0.0934945	0.049557	0.027	0.0427724	0.0107831	0.0423	0.0161837	0.0508841	0.1436	0.138591	0.018099	0.0301	0.0593774	0.0435368	0.032302	0.079281	0.0908792	0.0428	0.0398243	0.0567821	0.0368886	0.2618	0.0391364	0.0310889	0.0589	0.0338943	0.066329	0.0406816
22:4-LPE	528.31	10.279	0.901539	0.507261	0.0792	0.0629069	0.091	0.0880227	0.0380552	0.0818182	0.154471	0.226821	0.103	0.0812369	0.0906636	0.17434	0.0924433	0.0477	0.0673013	0.0327648	0.1161	0.0410001	0.0596493	0.0499	0.0350356	0.0674313	0.0851	0.0520895	0.110577	0.0609831	0.152309	0.0982169	0.1361	0.106419	0.0848633	0.0990789	0.0806	0.116862	0.0745475	0.0832	0.0351093	0.0563698	0.0555275
22:5-LPE	526.294	9.786	0.899172	0.602382	0.3376	0.0923848	0.3066	0.0843615	0.0587683	0.254251	0.148459	0.325828	0.4556	0.0923705	0.113853	0.288844	0.161098	0.1683	0.103296	0.042476	0.3153	0.059702	0.117182	0.2495	0.0924747	0.110873	0.2782	0.0882652	0.126401	0.0756089	0.126876	0.152202	0.386	0.145644	0.136883	0.165151	0.4027	0.177413	0.0692779	0.2791	0.0686254	0.0952193	0.111193
22:6-LPE	524.278	9.448	0.853487	0.402835	1.4666	0.535712	1.1158	0.515517	0.319912	1.36027	0.488042	1.44459	1.5225	0.436515	0.721777	0.596562	0.453554	0.5808	0.385324	0.355386	1.0475	0.448505	0.516594	0.7685	0.402868	0.306115	0.7407	0.381045	0.376145	0.341415	0.548729	0.528335	1.1394	0.573998	0.846137	0.429729	1.9556	0.421264	0.557185	1.1236	0.508783	0.457143	0.450836
14:0/18:2-PE	686.477	15.965	0.633953	0.233659	ND	2.59287	ND	1.93484	0.124559	4.55771	2.48995	1.15284	ND	0.356365	0.870576	0.930093	0.296175	ND	0.776163	0.149741	ND	0.295172	0.742707	ND	0.808749	1.7509	ND	0.460344	1.93698	0.535439	0.594597	0.280682	ND	0.638668	0.72509	1.7936	ND	0.357188	0.34936	ND	0.363632	0.517933	0.617078
14:0/20:4-PE	710.477	15.79	0.772571	0.421191	ND	1.5709	ND	2.0191	0.275622	3.09983	2.93138	1.51228	ND	0.525646	0.973437	0.889493	0.56359	ND	0.746814	0.0960023	ND	0.218875	0.4435	ND	0.564694	2.49756	ND	0.505664	2.42355	0.802407	0.559772	0.357648	ND	0.661655	1.33943	0.916383	ND	0.457336	0.324608	ND	0.581538	0.539713	0.601586
14:0/22:6-PE	734.477	15.503	0.808587	0.422198	0.263319	2.51703	1.59522	2.27637	0.512522	3.67268	2.33863	1.40578	1.10533	0.374488	0.929262	0.576977	0.332393	1.03491	0.635042	0.141333	0.548071	0.382968	0.425732	0.437844	1.08841	2.98594	0.92774	0.522698	1.33843	1.0015	0.617125	0.378699	1.46663	0.547571	0.770915	0.738761	1.13595	0.179525	0.300076	1.485	0.599862	0.778668	0.630611
16:0/16:1-PE	688.492	17.315	1.05142	0.852889	0.31521	0.926893	1.60825	1.99406	0.351231	2.70935	2.41591	0.617037	1.36028	0.435577	0.828065	1.4831	0.429593	0.37402	0.612882	0.059879	1.34873	0.238399	0.403377	0.401283	0.178133	2.29098	0.566158	0.495557	3.59396	0.636546	1.76343	0.394518	2.73083	0.669006	1.32265	0.736291	0.879291	0.985018	0.403782	0.415953	0.844373	0.692958	0.48744
16:0/18:1-PE	716.524	18.953	0.784365	0.426798	0.634419	1.88988	2.01962	2.6122	0.826747	4.60195	2.63168	0.865271	0.782696	0.279137	0.747231	0.508545	0.315713	0.471825	0.490918	0.180973	0.950837	0.231234	0.321408	0.502102	0.60759	2.50225	1.24807	0.723086	2.56631	1.13098	0.320244	0.214897	1.41129	0.499646	0.982296	0.750356	1.04461	0.485198	0.634474	0.934538	0.358932	0.38842	0.332425
16:0/18:2-PE	714.508	17.757	0.759888	0.45134	ND	2.11977	ND	1.68225	0.684616	4.77142	1.74483	0.995291	ND	0.285464	0.754177	0.702988	0.322347	ND	0.771206	0.291365	ND	0.309909	0.549673	ND	0.787105	2.45901	ND	0.675738	1.90628	0.957105	0.480633	0.238843	ND	0.693589	1.02107	1.28981	ND	0.488674	0.662656	ND	0.408175	0.455229	0.490775
16:0/18:3-PE	712.492	16.854	0.633946	0.326358	0.309074	4.22214	1.60349	1.48213	0.597939	6.46387	2.53782	0.459696	0.874389	0.0409399	0.0743292	0.318139	0.226828	0.39757	0.452892	0.132387	0.999868	ND	ND	0.647206	1.26333	3.06458	2.25466	0.876815	1.00019	1.57066	0.337213	0.0280418	0.767402	0.169984	0.138038	0.870503	0.76476	0.105982	0.198337	1.38159	0.186943	0.070592	0.109692
16:0/20:3-PE	740.524	18.518	0.792345	0.476565	0.526055	1.76107	1.87706	1.20006	0.518817	3.23896	1.59902	ND	0.851613	ND	0.012593	ND	ND	0.589862	ND	0.0258065	1.18937	ND	ND	0.396597	0.679996	2.15129	1.50471	0.411773	1.44034	0.826032	ND	ND	0.890606	ND	ND	0.117477	1.17348	0.0167686	ND	1.00064	ND	ND	ND
16:0/20:4-PE	738.508	17.578	0.776422	0.2323	0.988005	1.15589	1.65589	1.38248	0.493669	1.80185	1.23597	ND	0.882631	ND	ND	ND	ND	0.556161	ND	ND	1.10603	ND	ND	0.344263	0.380887	1.70615	0.96593	0.277412	1.03747	0.528215	ND	ND	1.41315	ND	ND	ND	1.17162	ND	ND	0.916319	ND	ND	ND
16:0/20:5-PE	736.492	16.457	0.889748	0.706767	1.02626	0.719866	1.49215	0.665302	0.291722	3.12657	1.16902	ND	0.71886	ND	ND	ND	ND	0.372238	ND	ND	1.00144	ND	ND	1.03026	0.639399	1.54969	0.646814	0.248932	1.19711	0.392403	ND	ND	1.10711	ND	ND	ND	1.90442	ND	ND	0.700448	ND	ND	ND
16:0/22:6-PE	762.508	17.22	0.822391	0.395799	0.863149	1.14302	1.10572	1.32867	0.603324	2.14538	0.794727	ND	1.351	ND	ND	ND	ND	0.541998	ND	ND	1.09762	ND	ND	0.492971	0.59271	1.97639	0.929575	0.308151	0.550918	0.556716	ND	ND	1.06769	ND	ND	ND	1.64741	ND	ND	0.902875	ND	ND	ND
16:0e/18:1-PE	702.544	19.964	1.07671	0.735681	0.577468	3.19582	0.915202	2.23838	1.48237	1.31505	0.993652	0.880337	1.60768	0.474798	0.453089	0.597742	0.639129	0.752409	0.535529	0.289171	0.518345	0.377385	0.437316	1.15251	1.17453	2.49207	0.567749	1.74241	2.16039	1.48148	0.393838	0.479654	1.35822	0.729118	0.569427	0.672206	1.56475	0.441192	1.02978	0.985665	0.486244	0.418433	0.81946
16:0e/18:2-PE	700.529	18.856	0.802469	0.621856	ND	5.48861	ND	1.33924	1.18562	1.29348	0.510355	0.318858	ND	0.322722	0.976346	2.08889	0.44869	ND	0.282011	0.322524	ND	0.50767	0.449249	ND	2.23064	0.782587	ND	2.64915	2.27986	1.61226	0.166703	0.184655	ND	0.48947	0.246449	0.499037	ND	ND	0.298334	ND	0.152704	0.154052	0.71984
16:0e/20:4-PE	724.529	18.679	1.02649	0.891008	0.59038	3.79196	0.971923	1.80827	1.05444	0.78327	0.321304	0.913186	1.25877	0.88487	0.59392	0.758922	0.597425	0.855681	0.702318	0.339815	0.937669	0.629281	0.951953	0.700103	1.02832	0.801021	0.983636	1.55893	1.0743	1.4707	0.643847	0.643847	0.829604	1.41785	0.950357	1.00286	1.60484	0.581015	1.35129	1.26739	0.897626	0.519998	0.927112
16:0e/20:5-PE	722.513	17.759	0.99452	0.99044	ND	5.32995	ND	1.6814	0.883841	1.31596	0.983575	1.1381	ND	0.328737	0.147551	0.797497	0.22121	ND	0.133318	0.0912997	ND	0.314992	0.672373	ND	3.78636	0.943226	ND	3.02921	0.841305	1.98577	0.59113	0.805088	ND	0.589253	0.17173	0.335604	ND	0.181445	0.335967	ND	0.437948	0.467713	0.458446
16:0e/22:6-PE	748.529	18.333	0.947057	0.827564	0.766668	4.20737	0.819871	1.99644	1.03937	2.70993	0.582415	0.666224	1.14152	0.581718	0.521506	0.648199	0.395803	0.867486	0.433185	0.261824	0.875537	0.448356	0.566836	0.913227	1.43224	2.19857	0.700624	1.58668	1.18141	1.23026	0.457571	0.499872	0.842776	1.01087	0.674246	0.539657	1.63009	0.530617	0.994036	1.4422	0.554599	0.418851	0.631359
16:1/18:2-PE	712.492	16.259	0.867786	0.636037	0.645783	2.27619	1.71084	1.88165	0.331505	3.83204	2.59219	1.26672	0.506024	0.361495	0.905068	0.854122	0.420557	0.720482	0.493854	0.0488183	0.937349	0.159606	0.437628	0.286747	0.398008	3.36204	1.43614	0.407166	2.99188	0.751436	0.5462	0.137654	1.4	0.441961	1.0499	1.0257	1.38313	0.290765	0.235981	0.973494	0.547352	0.496661	0.455844
16:1/20:4-PE	736.492	16.043	0.806042	0.525962	1.21996	1.87945	1.80408	2.46987	0.400148	4.00244	2.97278	1.2901	0.628232	0.251869	0.878046	0.850784	0.29227	0.477639	0.306225	0.139041	0.803164	0.276577	0.1559	0.219045	0.452961	4.12138	0.929419	0.287777	2.98684	0.775194	0.322615	0.332123	2.05659	0.36388	1.07582	0.403199	1.00091	0.385053	0.293627	0.860967	0.452748	0.245468	0.335802
16:1/22:5-PE	762.508	16.506	0.72615	0.383729	ND	2.01223	ND	1.95234	0.728357	4.33619	2.3529	1.23301	ND	0.258342	0.611766	0.582696	0.302022	ND	0.506623	0.575671	ND	0.391135	0.467018	ND	1.54135	2.77666	ND	0.462784	1.76891	1.18216	0.264926	0.22732	ND	0.913972	0.843641	0.961124	ND	0.200663	0.480627	ND	0.320445	0.394381	0.350734
16:1/22:6-PE	760.492	15.764	0.808151	0.551745	0.486358	2.124	1.40108	2.47409	0.466242	4.82416	2.76973	1.41564	0.830368	0.3087	0.65417	0.672618	0.340026	0.607618	0.184663	0.18084	0.846184	0.167477	0.319309	0.390141	0.559294	4.5157	0.839594	0.292329	1.71099	0.794299	0.380174	0.349588	2.25517	0.374306	0.899029	0.276568	1.30355	0.306824	0.24378	1.03994	0.406989	0.528867	0.459597
16:1e/16:0-PE	674.513	19.576	0.912322	0.666329	ND	2.86567	ND	1.4698	2.08341	0.27694	0.906999	1.32867	ND	0.711575	0.951693	1.20751	0.39103	ND	0.700748	0.388019	ND	0.677768	0.705234	ND	1.05279	0.580357	ND	1.14651	1.69431	1.52941	0.550335	1.09927	ND	0.932673	0.809039	0.791508	ND	0.581496	1.07142	ND	0.807067	1.02573	0.663008
16:1e/18:1-PE	700.529	19.759	1.1093	0.59374	0.468936	2.66231	0.661323	1.98157	2.07387	0.226321	0.586652	0.869985	1.70758	0.907126	0.7029	0.954878	0.682754	0.582197	1.01623	0.378679	0.445969	0.636977	0.445324	1.32973	1.03625	2.17185	0.733056	1.02151	1.03414	0.978487	0.303802	1.044	1.22071	0.99728	0.940067	0.743183	1.8597	0.586139	2.25194	0.990805	0.61667	0.699541	0.449572
16:1e/18:2-PE	698.513	18.902	1.30658	0.405361	0.462819	3.55493	0.719972	1.30519	1.9124	0.292689	0.389299	ND	1.36822	ND	ND	ND	ND	0.813177	0.00775878	0.00342184	0.531746	0.0367441	ND	1.05728	1.82527	1.37768	1.07061	1.15665	0.873825	1.24543	ND	ND	0.749412	ND	ND	ND	1.90653	ND	0.018711	1.32023	ND	ND	ND
16:1e/20:3-PE	724.529	19.053	0.991772	0.96866	0.565759	3.16083	0.606061	1.31689	2.38557	0.200224	0.404909	1.01959	1.89232	0.96582	0.608623	1.34366	0.631976	0.64667	1.17985	0.283148	0.482387	0.727684	0.658524	1.0906	0.867831	2.4132	1.08476	0.794054	0.705953	0.809017	0.248204	1.19468	0.840486	0.853064	0.794999	0.80934	1.65175	0.76481	2.01209	1.13921	0.491021	0.916098	0.438338
16:1e/20:4-PE	722.513	18.403	1.00184	0.99295	0.416509	3.60035	0.722049	2.197	1.62755	0.443253	0.563254	1.21498	1.43191	0.618987	0.711863	0.817279	0.638611	0.863051	0.583241	0.405296	0.756615	0.737222	0.633092	1.06187	1.41211	1.97648	0.583365	1.06099	0.818383	1.01782	0.414439	0.999613	0.611186	1.20976	0.983372	0.906826	1.9565	0.544533	1.16799	1.59694	0.580706	0.632941	0.482058
16:1e/20:5-PE	720.497	17.337	1.64498	0.199334	0.210806	2.54256	0.290316	1.07692	2.02618	0.71466	0.462594	0.775142	1.73834	0.466208	0.703169	0.789038	0.271171	0.289561	0.484308	0.0673385	0.616127	0.352323	0.400776	1.70921	5.83871	3.38936	0.149204	1.54107	0.498475	0.603707	0.198062	1.21356	0.322682	0.84583	0.692207	0.592001	4.12441	0.318711	0.655502	0.549346	0.442252	0.707345	0.330809
16:1e/22:4-PE	750.544	19.515	0.742971	0.177335	0.815384	3.52321	0.970811	3.0032	1.95366	0.687881	1.75245	0.928458	1.16571	0.635606	0.636519	0.675454	0.82669	0.818137	0.562055	0.535424	0.852711	0.571662	0.709669	0.679843	1.27399	ND	1.04241	1.14688	ND	ND	0.416015	0.686189	1.11002	0.821236	0.891403	0.726837	1.48666	0.515972	1.23784	1.05832	0.356786	0.428452	0.49646
16:1e/22:5-PE	748.529	19.052	1.11367	0.622676	0.565829	3.41944	0.688517	1.45577	1.54271	0.696108	0.933683	0.946177	1.36814	0.634322	0.694019	1.00835	0.579908	0.500435	0.785514	0.428505	0.74107	0.546965	0.442702	0.94397	ND	2.71578	0.453809	1.55508	1.13335	0.971127	0.614722	0.822559	0.93429	1.08943	1.16734	0.718819	2.73589	0.739397	0.768492	1.06804	0.443023	0.574642	0.572065
16:1e/22:6-PE	746.513	18.07	1.0555	0.764684	0.842663	2.7181	0.790158	2.17358	1.36543	0.7879	0.73464	1.00753	1.31705	0.742575	0.849457	0.406241	0.61115	0.664839	0.610361	0.709768	0.836876	0.823311	0.482586	0.795366	1.53585	2.62875	0.703192	1.17275	0.837736	0.868443	0.422062	0.949151	0.916739	1.0664	1.16859	0.852801	2.08974	0.503014	1.18794	1.04337	0.5627	0.556227	0.664963
18:0/18:1-PE	744.555	20.397	0.783902	0.300561	0.729698	1.54132	1.89881	1.85197	0.790691	4.48646	1.44682	1.38349	1.0256	0.354414	0.751284	0.86597	0.50956	0.449876	0.904694	0.370247	0.961983	0.563763	0.481345	0.536135	0.633466	1.20745	1.2097	0.601642	1.35067	0.85006	0.498963	0.340121	1.02655	0.79637	0.959891	1.57641	1.07512	0.751065	1.28035	1.08653	0.497177	0.695069	0.659279
18:0/18:2-PE	742.539	19.366	0.681441	0.337842	0.770669	2.68234	1.79453	2.16772	0.88192	6.87842	2.17265	0.570108	0.737581	0.168292	0.426918	0.411346	0.195975	0.546256	0.454271	0.225971	1.12404	0.211268	0.289694	0.400119	1.17778	2.68564	1.6029	0.776398	1.78791	1.19231	0.245	0.133235	0.802142	0.425791	0.520123	0.756652	1.14412	0.340621	0.392705	1.07765	0.204422	0.314505	0.309997
18:0/18:3-PE	740.524	18.372	0.797074	0.544778	ND	1.99519	ND	1.23408	0.544572	4.96574	1.82414	1.34756	ND	0.195465	0.649291	0.667938	0.156331	ND	0.770206	0.342402	ND	0.366954	0.58193	ND	0.804176	2.49244	ND	0.579614	1.47711	0.927088	0.891132	0.307865	ND	0.52158	0.828936	1.80383	ND	0.645445	0.668274	ND	0.331309	0.556498	0.522912
18:0/20:1-PE	772.586	21.524	0.887141	0.460195	0.648721	1.3696	1.92732	1.34079	0.487543	1.97815	0.558813	2.31201	1.04172	0.769132	1.55745	0.751386	0.724346	0.516824	1.083	0.395785	1.07133	1.08306	0.550217	0.764468	0.558455	0.862343	1.04441	0.251854	0.414648	0.762582	0.634886	0.491343	0.724092	1.14819	2.0095	1.32153	1.32974	1.0252	1.56664	0.931359	0.848929	1.44577	0.69685
18:0/20:2-PE	770.571	20.712	0.669874	0.242611	0.728454	1.99987	1.59542	2.21896	0.612391	5.53226	3.2129	0.720967	1.06703	0.474807	0.46614	0.653487	0.483929	0.737004	0.756624	0.274448	0.923393	0.0873757	0.326687	0.849863	1.11127	2.71232	1.5065	0.700014	1.77625	1.2216	0.254425	0.312653	0.694254	0.545669	0.257541	0.657457	0.870383	0.146141	0.249341	1.0277	0.179364	0.868542	0.186562
18:0/20:3-PE	768.555	20.053	0.651846	0.411554	0.887319	3.09679	1.67439	2.41923	0.967966	7.55307	3.62239	0.024459	0.892492	0.0105355	0.0331367	0.0933185	0.0136576	0.562374	0.0117602	0.00671434	1.11838	0.00761373	0.00897491	0.348109	1.11851	4.64915	0.976722	0.794005	1.99374	1.37307	0.0200925	0.0104765	1.42894	0.0115049	0.0468361	0.0145527	1.18471	0.0627792	0.0108617	0.926556	0.00801259	0.0168014	ND
18:0/20:4-PE	766.539	19.208	0.805153	0.375048	0.757813	2.25274	1.66167	2.64589	1.05999	3.07098	1.69679	1.24776	0.923225	0.301832	0.88201	0.479077	0.480882	0.614725	0.554011	0.402102	1.13944	0.550979	0.387348	0.360229	0.863732	3.42203	1.03368	0.503534	1.46043	1.04713	0.431994	0.336937	1.10911	0.589779	1.20173	0.46532	1.16167	0.73826	0.519408	1.23844	0.493252	0.437109	0.476953
18:0/20:5-PE	764.524	18.262	0.828656	0.696677	ND	2.01362	ND	2.44801	0.999012	4.22194	2.31862	0.493392	ND	0.14187	0.4451	0.458876	0.387036	ND	0.378708	0.185022	ND	0.491573	0.276065	ND	0.659815	4.91734	ND	0.575295	1.18481	1.22409	ND	ND	ND	0.531606	0.662026	0.352156	ND	0.548998	0.459648	ND	0.187486	0.309622	0.128266
18:0/22:4-PE	794.571	20.209	0.817542	0.490032	0.565459	1.68742	1.32068	2.15075	0.548687	4.05521	2.54189	1.01505	1.2562	0.287122	0.477694	0.647219	0.385742	0.526398	0.32998	0.165715	1.79026	0.714059	0.385252	0.272147	0.477768	3.36524	1.29114	0.507216	1.88873	0.803407	0.670832	0.293845	1.40875	0.871595	0.602221	0.741995	0.647984	0.612992	ND	0.920983	ND	0.406104	0.366273
18:0/22:5-PE	792.555	19.78	0.787085	0.458487	0.561391	2.07674	1.44688	2.22797	1.02212	3.88601	3.21734	0.779198	1.35027	0.236203	0.604607	0.600198	0.24985	0.518045	0.462254	0.145832	1.25504	0.480706	0.208193	0.353519	0.654417	4.55795	1.14736	0.503655	1.23574	0.924514	0.406004	0.235806	1.56437	0.623138	0.935017	0.475921	0.843722	0.606243	0.655736	0.959417	0.303848	0.337578	0.347212
18:0/22:6-PE	790.539	18.89	0.602414	0.289541	0.719722	2.6843	1.26321	3.22557	1.04973	7.76335	2.09322	0.669502	1.34178	0.0937669	0.29931	0.160878	0.0946874	0.535838	0.150984	0.155183	1.17808	0.253603	0.133343	0.49179	1.39675	4.00678	1.10078	0.728593	0.884936	0.909264	0.147394	0.104855	0.89458	0.304857	0.3916	0.347949	1.48201	0.153065	0.277731	0.992208	0.156017	0.179237	0.18355
18:0e/18:1-PE	730.576	21.262	0.891483	0.628223	ND	2.62279	ND	1.35082	1.99936	1.82201	0.462942	1.19373	ND	0.508205	0.593001	0.71482	1.41469	ND	0.909195	0.32109	ND	0.362599	0.557278	ND	1.03499	2.58792	ND	1.38203	1.22724	0.870668	0.549092	0.670573	ND	0.767908	0.726757	0.796668	ND	0.499828	1.285	ND	0.559006	0.380335	0.829452
18:0e/18:2-PE	728.56	20.333	1.11178	0.586871	0.525578	ND	1.11563	ND	ND	ND	ND	1.10823	1.15767	0.848198	0.448909	1.07686	1.44318	0.588648	1.22078	0.692476	0.989488	0.577496	1.44166	0.319552	ND	ND	1.33707	ND	ND	ND	0.833425	0.865172	0.498949	1.03422	0.410022	1.82149	2.61247	0.513568	1.73643	0.85494	0.611397	0.624652	1.69182
18:0e/22:4-PE	780.591	21.074	0.824305	0.5263	ND	3.26938	ND	3.19045	1.79022	0.603835	0.448367	2.08098	ND	0.469964	0.586753	0.687081	0.711447	ND	0.498543	0.311744	ND	0.335593	0.415089	ND	1.06913	1.86017	ND	1.20702	1.02354	0.714516	0.412789	0.938756	ND	0.763339	1.3228	0.800275	ND	0.436517	1.33845	ND	0.475142	0.773313	0.4648
18:1/18:1-PE	742.539	19.149	0.809933	0.413812	0.392981	2.71897	2.84153	2.43434	1.29429	3.15525	1.85258	0.688543	0.921221	0.296348	0.661817	0.687975	0.293086	0.516907	0.532703	0.439074	0.715957	0.314855	0.293518	0.569914	0.963899	2.01055	1.0945	0.735361	2.10716	1.82244	0.281508	0.301786	0.893438	0.435317	0.856341	0.937987	0.86072	0.577518	0.778447	1.19283	0.314648	0.752664	0.461027
18:1/18:2-PE	740.524	17.954	0.900231	0.63468	0.75003	1.96275	2.14519	1.73804	0.829114	3.06837	1.69046	0.816907	0.621355	0.305834	0.496349	0.418038	0.310708	0.648933	0.766133	0.557741	0.625154	1.73664	0.536784	0.471926	1.13114	1.98239	1.73996	0.635001	2.0637	1.70647	0.223016	0.223016	0.638662	0.835915	1.10533	1.35659	0.923309	0.398557	0.684605	1.43548	0.373599	0.515366	0.531457
18:1/18:3-PE	738.508	17.206	0.716959	0.470199	ND	2.80711	ND	1.41564	0.918132	5.06799	2.28148	0.632375	ND	0.629632	0.233615	1.2232	0.138653	ND	0.32216	0.0525976	ND	0.289605	0.295721	ND	1.59949	2.64692	ND	0.662983	1.31127	2.91838	0.249618	ND	ND	0.214888	0.196023	0.689797	ND	0.191749	0.267922	ND	0.124021	0.339452	0.279575
18:1/20:3-PE	766.539	18.431	0.817148	0.489975	ND	1.77533	ND	1.31685	0.502549	3.30969	2.04848	1.15127	ND	0.464858	1.33376	1.04773	0.59746	ND	0.701915	0.206258	ND	0.318403	0.687859	ND	0.689325	2.91187	ND	0.314826	1.78486	1.07609	1.58103	0.655459	ND	0.353712	0.570188	0.823719	ND	0.560777	0.710218	ND	0.480669	0.78489	0.239953
18:1/20:4-PE	764.524	17.761	0.812404	0.546472	ND	2.46136	ND	2.49306	0.821655	2.88762	2.38539	1.21039	ND	0.259742	0.725408	0.597259	0.313126	ND	0.339096	0.2873	ND	0.349835	0.373178	ND	1.06867	3.3065	ND	0.614611	2.13087	1.27669	0.332541	0.332541	ND	0.496273	1.0511	0.559574	ND	0.561981	0.613827	ND	0.318557	0.477549	0.354296
18:1/22:2-PE	796.586	21.078	0.787875	0.606267	ND	6.11672	ND	1.20732	1.35467	1.06582	0.948897	1.46687	ND	0.357661	0.234351	0.744321	0.629405	ND	0.390896	0.109767	ND	0.399291	0.699377	ND	3.57104	1.53407	ND	1.43042	0.729415	0.809587	0.547611	0.844195	ND	0.928629	0.287348	0.500798	ND	0.265862	0.683626	ND	0.231349	0.388695	0.521965
18:1/22:3-PE	794.571	19.944	0.973975	0.962716	ND	2.70695	ND	1.51821	0.903205	4.22333	1.12023	0.91127	ND	0.213976	0.292968	ND	0.273111	ND	0.323807	0.0952572	ND	0.224214	0.377264	ND	2.16598	6.99666	ND	0.662755	0.711475	0.926497	0.387213	0.420771	ND	0.483824	0.389155	0.383531	ND	0.143084	0.355515	ND	0.22668	0.229565	0.333488
18:1/22:6-PE	788.524	17.439	0.915449	0.697947	0.340569	1.75285	1.29699	1.94027	0.675352	1.48388	1.28007	2.85984	1.46226	0.435549	1.27571	0.640998	0.41571	0.689655	0.575128	0.393722	1.1447	0.669857	0.528065	0.452135	0.521736	3.73152	0.717599	0.248984	0.688427	0.762912	0.522116	0.569953	1.70861	0.760897	1.55493	0.845159	1.3749	0.641306	1.01475	0.812596	0.57081	0.942478	0.697022
18:1e/18:1-PE	728.56	21.086	1.02886	0.88997	0.688865	2.84349	0.852229	2.14625	2.50015	0.354774	0.681356	0.979684	1.52026	0.754377	0.497659	0.928373	0.856924	0.538594	0.86599	0.370928	0.505267	0.358763	0.478998	1.02482	1.50149	2.04186	0.682914	1.33055	1.13174	1.16823	0.275489	0.875827	1.22181	0.896889	0.711334	0.794035	1.99607	0.552558	1.74075	0.969172	0.441012	0.508608	0.411903
18:1e/18:2-PE	726.544	20.106	1.04583	0.816269	0.634844	3.51355	1.04534	1.17405	1.49588	0.351645	0.556271	0.927702	1.27133	0.542187	0.508595	1.0667	0.825734	0.772798	0.887344	0.747372	0.638664	0.562191	1.04149	0.663945	1.73727	0.966569	1.12455	1.26353	0.827354	1.35058	0.315044	0.889093	0.865829	0.970234	0.635264	2.0089	1.63272	0.415919	1.74671	1.34999	0.420613	0.497738	0.754462
18:1e/20:3-PE	752.56	20.483	1.00478	0.983039	0.687981	2.089	0.834531	2.25289	2.88793	0.649757	1.10696	0.933188	1.63518	0.621884	0.426021	0.875079	0.531315	0.695694	0.835315	0.231323	0.637014	0.36575	0.656741	0.718985	1.43561	3.22609	1.18419	1.49252	1.25918	1.58911	0.21526	0.690504	0.922551	0.670859	0.566459	0.509782	1.4782	0.493496	1.14487	1.20567	0.356563	0.560729	0.325816
18:1e/20:4-PE	750.544	19.912	0.788216	0.462198	0.698571	5.40318	0.868125	2.73495	2.29617	0.88884	0.88689	0.835612	1.32536	0.335569	0.364378	0.340964	0.541259	0.825669	0.344868	0.355385	0.890884	0.826719	0.551568	0.64593	2.15804	2.3114	0.5097	1.70183	0.997243	1.30617	0.324411	0.53658	0.708531	0.5909	0.201359	0.366949	1.84504	0.26955	0.497782	1.68219	0.394007	0.330136	0.307288
18:1e/20:5-PE	748.529	18.6	1.03665	0.891255	ND	2.86002	ND	1.70678	1.98513	ND	0.874695	0.849245	ND	0.557442	0.690899	0.803468	0.556574	ND	0.748035	0.272129	ND	0.436696	0.408526	ND	2.2858	2.1871	ND	1.77964	1.02213	1.09529	0.567331	0.740793	ND	1.04887	1.10794	0.62658	ND	0.662515	0.678028	ND	0.401023	0.519506	0.527805
18:1e/22:4-PE	778.576	20.845	0.862906	0.590748	ND	2.3923	ND	2.09569	2.03241	0.423308	1.93848	1.00313	ND	0.504546	0.607036	0.721026	0.892378	ND	0.638217	0.545162	ND	0.488316	0.748283	ND	ND	3.13629	ND	1.19025	1.41799	1.14277	0.365613	0.550813	ND	0.954022	0.777702	0.673601	ND	0.63626	1.00729	ND	0.338231	0.331773	0.447125
18:1e/22:5-PE	776.56	20.043	0.991943	0.965646	0.646885	2.85639	0.824077	1.88849	1.73354	0.705355	0.671212	1.33717	1.39003	0.601845	0.57145	0.863948	1.18184	0.604041	0.677908	0.601885	0.808209	0.478711	0.635837	0.764308	2.03821	2.24203	0.675976	1.22646	0.798246	0.653285	0.428462	0.975452	1.106	0.923442	0.646829	1.29577	2.06971	0.404962	1.08265	1.11076	0.479104	0.457138	0.542385
18:1e/22:6-PE	774.544	19.599	0.852907	0.570444	1.2103	5.25807	0.754031	1.8804	1.91934	0.586836	0.533535	1.21365	1.27285	0.464213	0.523021	0.559124	0.600152	0.759114	0.566672	0.469328	0.802355	0.482469	0.694683	0.607807	1.88037	1.90834	0.641978	1.24283	0.623073	0.915983	0.389422	0.698417	0.821591	1.00169	0.79651	0.73324	1.99334	0.448821	1.06285	1.13664	0.484584	0.523317	0.539055
18:2/18:2-PE	738.508	16.669	0.867701	0.731974	ND	3.36422	ND	1.70072	1.27746	3.3826	2.75787	0.554323	ND	0.0696667	0.186909	0.251631	0.0628724	ND	0.440173	0.402084	ND	0.254104	0.323766	ND	2.08909	1.77253	ND	0.825487	2.03972	2.28684	0.107548	0.16475	ND	0.660129	0.394531	2.67062	ND	0.0576687	0.272949	ND	0.087871	0.238841	0.303027
18:2e/18:1-PE	726.544	19.896	0.877606	0.682037	3.28539	1.39558	0.484699	1.35218	1.31913	0.245101	0.632861	ND	1.06117	ND	ND	ND	ND	0.462973	ND	ND	0.41278	ND	ND	0.825186	0.981838	1.86029	0.468967	0.645094	0.64379	0.924135	ND	ND	0.893359	ND	ND	ND	1.40353	ND	ND	0.701952	ND	ND	ND
18:2e/22:6-PE	772.529	18.256	1.08536	0.679705	0.71568	1.55551	0.659851	1.53649	1.10487	0.377218	0.58804	ND	1.44598	ND	ND	ND	ND	0.805865	ND	ND	0.801193	ND	ND	0.787029	1.33176	1.52678	0.725097	0.800735	0.384444	0.794158	ND	ND	0.910742	ND	ND	ND	1.87694	ND	ND	1.27163	ND	ND	ND
18:3e/18:2-PE	722.513	17.599	1.14252	0.873235	ND	6.96205	ND	1.9889	0.706189	0.568645	0.29398	0.212541	ND	0.144434	0.116057	0.0724365	0.0510742	ND	0.149198	ND	ND	0.724414	0.145331	ND	8.40106	0.8377	ND	2.50826	0.375087	0.492674	0.161386	0.244383	ND	ND	0.0894976	0.321198	ND	ND	0.0789453	ND	0.108505	0.0535521	0.192509
18:3e/20:4-PE	746.513	17.4	1.11631	0.72189	0.534705	4.02521	0.330997	1.8791	1.02107	0.0915566	0.476318	1.87608	2.02103	0.430426	0.468665	0.965685	0.27773	0.515487	0.317219	0.515402	0.814379	0.436734	0.932727	0.966086	3.63906	2.24078	0.257744	1.10082	0.798247	1.43033	0.292514	0.989856	0.305675	0.871775	0.548808	0.803207	3.48519	0.292884	0.543247	0.768709	0.482041	0.574298	0.678217
20:0e/20:4-PE	780.591	21.392	0.998381	0.995752	ND	4.00285	ND	ND	1.48496	0.209221	0.77252	0.880484	ND	0.581527	0.652179	0.780607	0.615403	ND	0.905264	0.83665	ND	0.674554	0.613898	ND	1.29006	2.0282	ND	ND	ND	ND	0.481572	0.897436	ND	1.24109	0.87182	1.0947	ND	0.563842	1.77808	ND	0.560243	0.588419	0.594422
20:1e/18:1-PE	756.591	22.21	1.24111	0.2295	0.835227	ND	0.964962	ND	ND	ND	ND	1.20473	1.36932	1.00694	0.830211	1.10236	0.810272	0.573864	1.28658	0.739494	0.512311	0.500326	0.711058	1.05492	ND	ND	0.624053	ND	ND	ND	0.430628	1.24998	1.63542	1.49659	1.04884	1.21789	1.43182	0.698905	2.82084	0.998106	0.668436	0.602606	0.573319
20:1e/18:2-PE	754.576	21.368	1.08411	0.672061	0.913563	3.13531	1.09286	2.12323	1.22933	0.15278	0.584458	0.897698	1.20955	0.478207	0.538695	0.802932	0.563034	0.70052	0.990052	0.964229	0.60457	0.391466	0.841881	0.685477	1.4282	1.25248	0.927793	1.42546	1.27384	1.64322	0.272341	0.860364	1.2193	1.10235	0.66142	1.67426	1.30712	0.421466	1.9182	1.33924	0.407379	0.355343	0.610389
20:1e/20:3-PE	780.591	21.668	0.961801	0.889714	0.804302	4.1895	0.772493	2.39618	2.02578	0.250569	0.807655	0.789847	1.84035	0.516503	0.20184	0.401368	1.04696	0.646774	0.648685	0.272229	0.661921	0.460561	0.646127	0.842169	1.34342	3.52805	1.05271	1.20182	1.03245	1.46779	0.162097	0.979523	1.21327	0.326178	0.308887	1.15728	1.02393	1.1394	1.1129	1.14208	0.202938	0.26045	0.123026
20:1e/20:4-PE	778.576	21.189	0.900883	0.70204	0.768312	4.14012	0.865763	3.19206	1.72096	0.405685	0.897	1.06655	1.28783	0.441319	0.384514	0.584372	0.542318	0.674411	0.608611	0.57742	1.07099	0.33638	0.452858	0.770571	1.79914	2.74257	0.413682	1.36518	1.01391	1.4757	0.453834	0.510959	0.878993	0.789815	0.502411	0.595881	1.27783	0.373368	0.721457	1.99161	0.519624	0.372787	0.413203
20:1e/22:5-PE	804.591	21.713	0.94794	0.905607	ND	3.42949	ND	2.5184	1.7812	ND	1.10045	0.489519	ND	ND	0.423581	0.31745	0.362007	ND	0.268464	0.260715	ND	0.342701	ND	ND	2.68755	2.65497	ND	1.32201	ND	1.79679	0.20014	0.293127	ND	0.169638	0.0977094	ND	ND	0.1218	ND	ND	0.52028	ND	0.841996
20:1e/22:6-PE	802.576	20.906	0.905517	0.724639	0.828089	3.88041	0.828089	2.86236	1.76106	0.432197	0.850278	1.138	1.59262	0.388008	0.431016	0.418938	0.493106	0.820612	0.305881	0.530042	0.716556	ND	0.664666	0.866721	2.11099	3.16731	0.526513	1.64935	0.75059	1.54337	0.366039	0.69826	1.11783	0.743851	0.5772	0.120985	1.63935	0.300239	0.872947	1.06362	0.297734	0.285318	0.359847
20:2e/18:1-PE	754.576	21.133	1.06227	0.824971	ND	2.36808	ND	2.43001	1.89134	0.0691381	0.781377	1.02676	ND	0.849196	0.693724	0.724433	0.673829	ND	0.857906	0.361758	ND	0.4643	0.37129	ND	1.17187	3.26093	ND	1.09067	0.883682	1.1388	0.622532	0.76295	ND	1.00962	0.850533	0.726827	ND	0.552666	1.87259	ND	0.50572	0.631218	0.356249
20:2e/18:2-PE	752.56	20.147	0.888706	0.619642	ND	3.35034	ND	2.07597	1.35878	1.37411	0.517002	0.886379	ND	0.609047	0.515305	0.69992	1.22077	ND	0.708282	0.404192	ND	0.485469	0.64957	ND	1.11167	1.58482	ND	1.42797	1.02604	1.11154	0.711908	0.711908	ND	1.15772	0.531895	0.933949	ND	0.412218	1.20871	ND	0.679316	0.500859	1.03433
20:2e/22:6-PE	800.56	19.667	0.956016	0.88256	ND	2.26503	ND	3.47463	2.26649	0.390493	0.719578	1.24637	ND	0.548798	0.760031	0.48069	0.487838	ND	0.410328	0.474393	ND	0.436488	0.364761	ND	1.38402	2.68803	ND	0.707272	1.35374	1.53938	0.480472	0.755318	ND	0.846178	0.545636	0.833574	ND	0.481012	1.4627	ND	0.596154	0.554102	0.446498
20:4/20:4-PE	786.508	16.195	0.777245	0.358943	ND	1.70448	ND	1.92653	1.01451	3.21426	2.17505	1.54049	ND	0.258035	0.723653	0.544239	0.348464	ND	0.603554	0.561465	ND	0.573403	0.634971	ND	1.49311	2.14674	ND	0.926047	1.11599	1.49962	0.419172	0.323475	ND	0.954378	0.980597	1.08242	ND	0.251061	0.715981	ND	0.403047	0.444633	0.420616
14:0/18:2-dMePE	714.508	15.647	1.70285	0.436162	0.0413	0.0487757	0.0632	0.0147245	0.0161421	0.0547335	0.0285989	0.00384487	0.0248	0.000911689	0.00132898	0.00194216	0.00164658	0.0381	0.00592511	0.00405914	0.0294	0.000572971	ND	0.0258	0.00954471	0.0350528	0.0649	0.0208381	0.0271266	0.0220866	0.00225622	0.00225622	0.0432	0.00288025	0.0041813	0.369384	0.0439	0.00143228	0.00064599	0.039	0.00229383	0.00107201	0.00114392
14:0/20:4-dMePE	738.508	15.012	0.733343	0.334977	0.035	0.0314372	0.0398	0.0237738	0.0128612	0.163127	0.0192731	0.0441239	0.0266	0.0136239	0.0352138	0.0253911	0.022912	0.015	0.00638998	0.0100288	0.0273	0.00658038	0.0155984	0.016	0.0142499	0.0241609	0.0284	0.0133397	0.0135766	0.0141425	0.0148654	0.0204689	0.0413	0.0280988	0.052649	0.0251605	0.0363	0.0179858	0.0136096	0.0245	0.0132433	0.0137642	0.017305
14:0/22:6-dMePE	762.508	15.002	0.595439	0.351183	ND	0.0356605	ND	0.0356791	0.0232221	0.0985113	0.0376335	0.0190784	ND	0.00106757	0.00523705	0.0029853	0.00190906	ND	0.00114577	0.0014448	ND	0.00496488	0.00365319	ND	0.0194509	0.0635688	ND	0.0142279	0.0182354	0.0186413	0.00449428	0.00369392	ND	0.00525345	0.00891416	0.00254142	ND	0.00349972	0.00270701	ND	0.00204287	0.00330573	0.00307389
16:0/14:0-dMePE	690.508	16.883	0.955133	0.845826	ND	0.0222467	ND	0.0295766	0.00404039	0.0381764	0.0279835	0.0302408	ND	0.017309	0.016416	0.014093	0.0116192	ND	0.00902437	0.00253947	ND	0.00782113	0.0112409	ND	0.00924619	0.0415312	ND	0.0173442	0.0262502	0.00508893	0.0285586	0.0154068	ND	0.0277136	0.0197127	0.0100961	ND	0.00997224	0.00377299	ND	0.0129409	0.0102931	0.0100597
16:0/16:0-dMePE	718.539	18.653	0.755617	0.10657	0.0257	ND	0.0535	0.042015	0.0308339	0.0562828	0.0377617	0.0706455	0.0325	0.00963177	0.0286877	0.0278207	0.0269713	0.0421	0.00463696	ND	0.0358	0.0279546	0.0142827	0.0331	0.0231296	ND	0.0374	0.0244526	0.0342094	0.0141953	0.0215138	0.0227516	0.0468	0.0517757	0.0233918	0.019175	0.0346	0.0168097	0.0051411	0.0283	0.0134601	0.0113871	0.0173515
16:0/16:1-dMePE	716.524	17.19	0.949035	0.812454	0.07205	0.0683104	0.2086	0.1088	0.0248355	0.0986105	0.0974624	0.0674195	0.1095	0.0411214	0.0560335	0.0592274	0.0354094	0.0856	0.0289249	0.00572228	0.1605	0.0204593	0.0367302	0.0867	0.024644	0.157865	0.1227	0.016238	0.125387	0.0332571	0.0723897	0.0656339	0.1674	0.0856841	0.0726127	0.0191564	0.0946	0.059767	0.0163754	0.0722	0.0338915	0.0352682	0.0221386
16:0/18:1-dMePE	744.555	18.88	0.879766	0.631294	0.7016	0.253309	0.8115	0.378286	0.179872	0.379507	0.332943	0.182863	0.5348	0.135707	0.159346	0.151874	0.121291	0.419	0.069805	0.0539142	0.6786	0.0749137	ND	0.3906	0.144884	0.63567	0.6408	ND	0.228481	ND	0.0989786	0.18752	0.6975	0.115583	0.134097	0.0778715	0.5811	0.13775	0.0738914	0.5037	0.101498	0.0965243	0.097072
16:0/18:2-dMePE	742.539	17.556	0.912086	0.672846	0.4298	0.64679	0.5677	0.433648	0.243883	0.49233	0.255117	0.199279	0.3759	0.0933525	0.124818	0.115085	0.102293	0.3439	0.0456004	0.0787415	0.4389	0.088163	0.126674	0.223	0.286783	0.569915	0.5543	0.245426	0.281002	0.301058	0.0500343	0.112454	0.4032	0.155201	0.232645	0.163888	0.4702	0.0800612	0.12154	0.4662	0.068025	0.081099	0.128334
16:0/18:3-dMePE	740.524	16.741	1.26038	0.552043	0.02835	0.0441086	0.0483	0.0531942	0.0162634	0.128339	0.0829076	0.329116	0.041	0.0812442	0.0587378	0.0716553	0.0221821	0.042	0.152614	0.0941831	0.0631	0.0368782	0.128096	0.0338	0.0173312	0.0677824	0.0644	0.0151913	0.110224	0.0277144	0.0233188	0.0167101	0.0427	0.414708	0.204212	0.491871	0.0331	ND	0.0454317	0.0507	0.0455462	0.130638	0.0832619
16:0/20:3-dMePE	768.555	18.118	1.2981	0.384875	0.1911	0.115967	0.3451	0.348845	0.0583965	ND	0.272066	ND	0.2113	0.021793	0.0514825	ND	0.0515894	0.2146	0.0739431	0.0511487	0.3084	0.0591478	0.0492029	0.131	0.0845652	0.411027	0.2944	0.0254662	0.124671	0.11588	0.0351002	0.0556623	0.2176	0.724866	0.393788	0.255269	0.2509	0.488453	0.0507063	0.1768	0.0324593	0.035402	0.02936
16:0/20:4-dMePE	766.539	17.346	0.827353	0.480895	0.156	0.664848	0.2907	0.139418	0.118307	0.217205	0.124909	0.184093	0.2394	0.0849026	0.0156239	0.0821264	0.0755522	0.1844	0.0713861	0.0480735	0.2421	0.064818	0.037162	0.1551	0.129574	0.318436	0.2122	0.101249	0.144738	0.142144	0.0705106	0.0942718	0.2626	0.104388	0.038752	0.0319375	0.2251	0.0658844	0.0390903	0.2654	0.0576808	ND	0.0569437
16:0/20:5-dMePE	764.524	15.284	0.842201	0.687925	ND	0.0128299	ND	0.0204425	0.00722357	0.0827176	0.0278147	0.0229619	ND	0.00579273	0.0212541	0.0040658	0.00740592	ND	0.00451445	0.00458902	ND	0.00400163	0.00346702	ND	0.0304115	0.0469591	ND	0.0151542	0.0120152	0.00734648	0.00465971	0.00720412	ND	0.0159145	0.0231304	0.00802135	ND	0.00945368	0.00790744	ND	0.00491854	0.00663437	0.00698242
16:0/22:4-dMePE	794.571	19.958	1.39466	0.418343	0.0453	ND	0.1003	ND	ND	ND	ND	0.115691	0.0917	ND	0.0303132	0.0396062	0.0236148	0.0988	0.0243406	0.00831419	0.1145	0.00965473	0.0236643	0.0705	ND	ND	0.1008	ND	ND	ND	0.0322457	0.0426336	0.1002	0.0783346	0.0327234	0.381177	0.0987	0.011078	0.0195213	0.1436	0.0170746	0.0192073	0.0201778
16:0/22:6-dMePE	790.539	16.993	0.94625	0.818163	0.1876	0.122569	0.2077	0.243891	0.0805148	0.0937832	0.0568031	0.0895124	0.1913	0.0313087	0.064684	0.0129581	0.0347164	0.1387	0.030649	0.0311387	0.2234	0.0430856	0.0219289	0.1174	0.0934904	0.166474	0.2159	0.0707934	0.0591533	0.0947939	0.00277231	0.0720348	0.1498	0.15267	0.044053	0.0345577	0.2249	0.0294991	0.0309773	0.2073	0.0596608	0.0314846	0.0410027
16:1/20:4-dMePE	764.524	15.355	0.583071	0.173992	ND	0.0132708	ND	0.00791182	0.0020227	0.0461457	0.00796614	0.0305156	ND	0.00581866	0.0166062	0.00891745	0.00333082	ND	0.00493836	0.00483031	ND	0.00577305	0.00504127	ND	0.00460531	0.0098154	ND	0.00490368	0.00524194	0.00392617	0.00863575	0.00709692	ND	0.0100122	0.016285	0.00382818	ND	0.00581555	0.00506602	ND	0.0053241	0.00544597	0.00588235
18:0/18:1-dMePE	772.586	20.541	0.750738	0.288158	0.0847	0.0681118	0.1301	0.0595376	0.0131552	0.0779286	0.205747	0.0950703	0.1018	0.0224206	0.052348	ND	0.0270402	0.0563	0.011193	0.013138	0.1299	0.00780266	ND	0.0606	0.0171399	0.0698582	0.1104	0.0379164	0.0528449	0.0235441	0.017055	0.0244637	0.167	0.0548522	0.0727284	0.0128534	0.0904	0.0171907	0.0157432	0.0715	0.0197601	0.0535763	0.0318356
18:0/18:2-dMePE	770.571	19.379	0.96417	0.88635	0.2827	0.213807	0.3824	0.149846	0.0729077	0.234495	0.0575697	0.104956	0.2294	0.073915	0.0476385	ND	0.0608153	0.2564	0.015022	0.0795853	0.3535	0.0377716	ND	0.2204	0.165778	0.194253	0.4586	0.0964095	0.0725993	0.145165	ND	0.0952198	0.2654	0.0714792	0.118905	0.0571035	0.3059	0.067293	0.0818887	0.3149	0.0503396	0.0545122	0.0224387
18:0/20:3-dMePE	796.586	19.794	1.22125	0.570468	0.047	ND	0.0955	0.220566	0.244968	0.452296	0.255443	ND	0.0824	0.342714	ND	0.449223	0.277506	0.0559	0.498778	0.104531	0.131	ND	0.349282	0.0325	0.174775	ND	0.0987	0.115645	ND	ND	0.402362	0.299362	0.0858	1.17434	0.864284	0.151395	0.0833	ND	0.156138	0.0612	0.297105	ND	0.408271
18:1/18:1-dMePE	770.571	19.084	1.08206	0.88438	ND	ND	ND	0.0433676	0.0123094	0.0403052	0.0148704	0.0274533	ND	0.00853437	0.00991692	0.0120859	0.0177977	ND	ND	0.0048325	ND	ND	0.00422384	ND	ND	0.108032	ND	0.00560386	0.0120822	0.0170233	0.00501381	0.00963984	ND	ND	0.00869219	0.00602803	ND	0.0180906	ND	ND	ND	0.0131535	0.00839587
18:1/18:2-dMePE	768.555	17.864	0.853089	0.459681	0.151	0.111737	0.0769	0.0619265	0.0436626	0.0824083	0.0317344	0.0966059	0.0574	0.0363597	0.019392	ND	ND	0.0487	0.0322996	0.0146137	0.0426	0.0161648	0.0160889	0.0479	0.0682545	0.0884741	0.0944	0.0415265	0.066984	0.0390553	0.0323843	0.0441305	0.0491	0.0779027	0.0260816	0.0323088	0.0587	0.00866045	0.0291368	0.0817	0.0176373	0.01915	0.0195213
18:2/18:2-dMePE	766.539	16.564	0.659866	0.33093	0.1879	ND	0.0606	ND	ND	ND	ND	0.0396526	0.048	0.0127272	0.0415333	0.012934	0.0223961	0.0372	0.0182961	0.00898896	0.0346	0.00483198	0.011685	0.0214	ND	ND	0.0592	ND	ND	ND	0.00716982	ND	0.0338	0.0241367	0.019621	0.0327193	0.0268	0.0278056	0.0156245	0.0602	0.00915091	0.00695551	0.0126323
20:0e/20:4-dMePE	808.623	22.401	1.05456	0.815757	ND	0.187917	ND	0.124906	0.10215	0.0110312	0.0611551	0.0911712	ND	0.0643997	0.0739414	0.0590397	0.0475997	ND	0.0571411	0.0467513	ND	0.0287261	0.0325141	ND	0.100048	0.176928	ND	0.08217	0.0656061	0.111729	0.0256905	0.0846556	ND	0.123104	0.0880094	0.0481395	ND	0.0290854	0.0831536	ND	0.0364869	0.032372	0.0296464
20:1e/18:1-dMePE	784.623	23.144	1.07111	0.677368	0.0128	0.0470821	0.0253	0.0627382	0.0408575	ND	0.0199342	0.0562768	0.0241	0.0330917	0.0337491	0.0248471	0.0262571	0.015	0.0279119	0.0155272	0.0132	0.00808939	0.0190908	0.03215	0.0269874	0.0480437	0.0171	0.0315732	0.0297168	0.029998	0.013056	0.0488575	0.0412	0.0612792	0.0501286	0.0184251	0.0254	0.0184758	0.0399021	0.023	0.0164037	0.0155286	0.0148014
20:1e/18:2-dMePE	782.607	22.437	1.18222	0.367661	0.0219	0.18676	0.0472	0.1384	0.0858651	0.0171497	0.0583671	0.11706	0.0565	0.0511754	0.0641767	0.0608475	0.0461749	0.0398	0.0662028	0.0722651	0.0246	0.0248213	0.0701417	0.0505	0.111204	0.129479	0.0525	0.111758	0.0793688	0.128117	0.0325183	0.0978574	0.0726	0.169063	0.0891363	0.0988962	0.0495	0.0289746	0.0891451	0.05718	0.031454	0.0283654	0.0471987
20:1e/20:3-dMePE	808.623	22.683	0.890597	0.618799	ND	0.0339837	0.0071	0.0219815	0.0204362	ND	0.00711553	0.0629948	0.0195	0.0208442	0.0197843	0.0191526	0.0143663	0.0085	0.0203939	0.00853547	0.0082	0.00966768	0.0151875	0.0127	0.00754286	0.0487658	0.01495	0.00744459	0.00934476	0.00962254	0.0194594	0.027486	0.0127	0.0369491	0.0261082	0.0113832	0.0086	0.0140706	0.0202102	0.0125	0.0090371	0.0150887	0.00895652
20:1e/20:4-dMePE	806.607	22.276	1.00056	0.99797	0.0196	0.255718	0.0511	0.232686	0.108614	0.0188454	0.0564683	0.186036	0.0695	0.0796508	0.104611	0.070579	0.0738654	0.0499	0.0653645	0.0557883	0.0598	0.0316418	0.0708947	0.0711	0.115098	0.196654	0.0257	0.0876242	0.0631601	0.108222	0.0600918	0.121678	0.0626	0.228023	0.130799	0.0414627	0.0561	0.0504187	0.0807043	0.1017	0.058096	0.0433822	0.046435
20:2e/18:1-dMePE	782.607	22.182	1.02073	0.913275	0.0252	0.0480397	0.0154	0.0529775	0.046439	ND	0.02237	0.0612343	0.0288	0.0444081	0.0431971	0.0323777	0.026456	0.0147	0.0302031	0.0143058	0.0078	0.0166453	0.0120747	0.029	0.0232823	0.0847526	0.0143	0.0192221	0.0219867	0.0274042	0.0205836	0.0430094	0.0297	0.0657435	0.0561091	0.0146458	0.0231	0.0247196	0.0487759	0.0166	0.0196688	0.0206714	0.0121453
20:2e/18:2-dMePE	780.591	21.368	1.12963	0.428292	0.023	0.14065	0.0472	0.103766	0.0706931	0.00947283	0.0322089	0.092793	0.066	0.0553389	0.0647943	0.0510638	0.0498606	0.054	0.0570905	0.0501612	0.0468	0.0354655	0.0447826	0.0412	0.0584099	0.0760327	0.0558	0.0590087	0.0510687	0.0651728	0.0487381	0.0966081	0.0479	0.158616	0.0834507	0.0610417	0.0648	0.0357409	0.0914924	0.0857	0.0361461	0.0431891	0.0421045
20:2e/20:4-dMePE	804.591	21.184	1.03155	0.904187	0.0338	0.27243	0.0522	0.287545	0.164072	0.0108368	0.0923754	0.26877	0.0524	0.107141	0.163593	0.0746835	0.117994	0.0504	0.0741827	0.0575663	0.0444	0.0440617	0.0300984	0.0552	0.150568	0.364675	0.0354	0.12402	0.0896583	0.116475	0.0757736	0.142101	0.0389	0.242738	0.220902	0.0304477	0.0661	0.0696487	0.116938	0.0661	0.0782706	0.0527291	0.0334657
20:2e/22:6-dMePE	828.591	20.907	1.2324	0.477102	0.01055	0.161262	0.0301	0.140225	0.0974406	0.0147905	0.0683643	0.182427	0.0465	0.0323018	0.0503061	0.0261091	0.0508046	0.0402	0.0367468	0.0385537	0.0271	0.0219168	0.0265579	0.0405	0.103984	0.316365	0.0288	0.0803546	0.042922	0.0824737	0.0535565	0.0661867	0.029	0.140129	0.116281	0.0230197	0.045	0.0291869	0.0744074	0.0302	0.0416889	0.0511241	0.0347372
16:0-LPA	409.236	10.226	0.682549	0.251984	0.771953	1.04906	0.66933	1.2756	0.250359	1.43023	0.759995	1.05083	1.72058	0.956955	0.864837	0.761831	0.936919	0.611521	2.15747	7.89637	1.00915	1.19881	2.51235	0.7056	0.658872	2.41739	1.1949	0.627235	0.821083	0.271357	0.821575	0.787567	1.99654	0.756763	1.09559	0.669963	0.65848	1.43469	0.48698	0.661939	1.24997	1.31099	1.40651
18:0-LPA	437.267	11.261	0.675466	0.181046	0.541019	0.488543	0.949193	0.217354	0.59454	0.298098	0.610545	3.64969	2.52133	1.21173	0.713445	1.23718	2.13305	0.36039	1.10188	4.39526	0.543042	0.442829	0.784349	0.393561	0.465405	0.420776	0.739297	0.489475	0.406276	0.570431	0.656147	0.78349	1.20553	0.929471	0.795859	0.677391	1.81997	1.77891	0.897139	0.926664	0.85542	0.598108	0.797222
18:1-LPA	435.252	10.402	0.93719	0.202818	0.862305	0.971277	1.28825	1.10665	0.951823	0.955572	0.963052	0.875625	ND	0.97023	0.913927	1.02306	1.0431	1.14035	1.15723	0.826577	0.913252	1.17336	1.054	ND	1.00045	1.04774	0.731698	1.00218	0.958989	1.02328	1.02551	0.810813	0.839699	0.9005	0.847881	1.08605	ND	0.984196	1.03573	0.514151	ND	1.09721	1.19399
18:2-LPA	433.236	9.807	0.619064	0.179628	0.377051	1.27874	0.718916	1.2626	0.419797	1.7601	0.741794	0.889898	2.23078	0.800316	0.864029	1.06843	0.66069	0.738585	2.09731	8.4683	0.685251	1.319	3.1866	0.867246	0.884962	1.40519	1.72234	0.784457	0.820165	0.381349	0.535711	0.509855	1.2613	0.604712	1.08419	1.3492	0.62739	1.23772	0.494818	0.771145	0.9989	1.45223	1.47513
20:4-LPA	457.236	9.763	0.690878	0.0467255	0.496345	0.778757	0.39495	1.61566	0.723368	0.778621	1.23812	2.06275	1.21223	1.25151	1.68462	1.08043	1.74061	1.11362	1.42934	2.53763	0.849804	0.862652	3.08717	0.4272	0.268997	0.633054	1.51821	0.325933	0.7553	0.488825	0.783895	0.726724	2.02819	0.632195	1.62333	0.816149	0.700445	1.87967	1.25193	0.853357	0.669912	0.416349	1.3364
14:0-LPI	543.258	9.123	1.12576	0.598569	0.0486	0.0298076	0.0257	0.0243661	0.0205997	0.00430471	0.00985806	0.0916664	0.0305	0.0743598	0.0158596	0.0430312	0.0537384	0.0095	0.0389853	0.00468138	0.0122	0.0037646	0.0183577	0.0301	0.016131	0.0310995	0.0055	0.0257964	0.0471614	0.0296682	0.0762706	0.0723293	0.0238	0.0297452	0.0237755	0.0389289	0.0335	0.0504478	0.0108487	0.0132	0.0179878	0.0532981	0.033876
14:1-LPI	541.242	8.754	1.12277	0.740599	ND	0.00158607	ND	0.00183064	ND	0.00116486	0.00371475	0.0210139	ND	0.0103393	0.00485298	0.0192806	0.0121207	ND	0.00445541	0.000379516	ND	0.00164451	0.00473403	ND	ND	0.00817181	ND	0.00235535	0.0120501	0.00109343	0.0188766	0.0174116	ND	0.00408318	0.00534277	0.00466125	ND	0.00905933	0.00122611	ND	0.00406865	0.0125319	0.00440483
16:0-LPI	571.289	9.729	1.0661	0.686706	1.7217	1.20696	1.2611	1.06909	0.694915	0.262904	0.999478	2.89414	1.106	1.54348	0.738904	1.66624	1.89914	0.4555	1.04419	0.84399	0.9576	0.551092	0.702368	0.8727	0.826239	1.41361	0.3414	1.14936	1.47543	1.21442	1.94834	2.91072	0.9234	1.43568	0.917093	1.16835	1.2528	1.5844	0.947989	0.7635	0.732369	1.39322	0.989758
16:1-LPI	569.273	9.195	1.05993	0.786072	0.3595	0.259037	0.3093	0.26693	0.200093	0.0806452	0.239498	0.89408	0.2437	0.375573	0.260635	0.576986	0.348429	0.0809	0.164078	0.076311	0.1916	0.120873	0.175811	0.1753	0.0663801	0.340585	0.096	0.16614	0.565421	0.2442	0.476865	0.675273	0.3298	0.218007	0.260779	0.206677	0.2083	0.651212	0.160563	0.1511	0.167363	0.482347	0.186142
18:0-LPI	599.32	10.651	0.918131	0.548934	2.2636	2.65249	2.6387	1.81376	1.79362	0.766639	2.0072	5.67613	2.2629	2.52692	1.54475	3.0462	3.40225	0.9839	1.70762	2.00911	1.6067	1.50291	0.888455	1.7367	2.39293	3.04739	1.2587	2.24886	1.91628	2.39761	1.6476	2.98093	1.3887	2.35844	1.1697	1.2786	3.4556	1.71254	1.85229	2.3729	1.425	1.35382	1.7207
18:1-LPI	597.305	9.875	1.0444	0.763049	0.5409	0.597867	0.6097	0.499862	0.507537	0.120955	0.384686	1.24653	0.5595	0.869537	0.426167	0.829831	0.92572	0.2175	0.512101	0.508633	0.2704	0.31574	0.245581	0.3524	0.459488	0.469648	0.1954	0.560801	0.567803	0.596563	0.477185	1.11524	0.4429	0.682702	0.492135	0.593669	0.6916	0.856673	0.774332	0.4856	0.317281	0.669779	0.400012
18:2-LPI	595.289	9.39	0.892422	0.55349	0.8862	0.523618	0.7633	0.382473	0.1655	0.144355	0.136454	2.19279	0.8043	1.01358	0.669465	1.2311	1.0254	0.566	1.19691	1.81425	0.6218	0.762717	0.820481	0.582	0.599525	0.274728	0.4611	0.257385	0.232571	0.233038	0.70354	1.50419	0.4871	1.20381	0.77043	1.5205	1.0035	0.840579	0.956191	0.9877	0.519907	0.832163	0.797926
18:3-LPI	593.273	9.114	1.05192	0.849882	0.0381	0.0400048	0.017	0.0220606	0.0187197	0.00910708	0.0317457	0.11674	0.0153	0.0232248	0.0137	0.0416076	0.0351044	0.0073	0.0268146	0.0292833	0.0215	0.0150482	0.0292762	0.0197	0.0275312	0.0335963	0.0097	0.0253029	0.0438953	0.0309831	0.0723269	0.12005	0.0101	0.0248919	0.0146529	0.0372858	0.0088	0.0296408	0.0201705	0.0164	0.0112927	0.0377328	0.0167643
20:0-LPI	627.351	11.658	1.1097	0.708606	ND	0.00692257	ND	0.00233128	0.0029223	ND	ND	0.0215242	ND	0.00808531	0.00261954	0.00532576	0.0104355	ND	0.00386205	0.0103913	ND	0.00390281	0.00706621	ND	0.0057962	0.00779186	ND	0.00666592	0.00677028	0.0051846	0.00349696	0.0256189	ND	0.0069214	0.003312	0.00823201	ND	0.00963665	0.00779811	ND	0.00363814	0.00899817	0.00858404
20:1-LPI	625.336	10.704	1.07694	0.764962	ND	0.00912055	ND	0.00560971	0.00805989	0.000720856	0.00811418	0.0237879	ND	0.0187893	0.00561096	0.00861525	0.0195746	ND	0.00343467	0.00906593	ND	0.00413393	0.00321009	ND	0.00530257	0.013284	ND	0.00514329	0.00605069	0.01259	0.00515002	0.023221	ND	0.00924661	0.00629685	0.00466502	ND	0.0178359	0.0131311	ND	0.00487982	0.0132498	0.00747214
20:2-LPI	623.32	10.124	1.1218	0.521923	ND	0.0306802	ND	0.0116412	0.0184811	0.00326967	0.0254748	0.0503156	ND	0.0450278	0.0179205	0.0387179	0.0387153	ND	0.029382	0.0201731	ND	0.014578	0.0120337	ND	0.0230989	0.0516331	ND	0.0224123	0.0181958	0.0267672	0.0175107	0.0514182	ND	0.0234048	0.0205069	0.0252612	ND	0.0421006	0.0303411	ND	0.0137522	0.0338762	0.0281013
20:3-LPI	621.305	9.616	1.054	0.716479	0.2291	0.210298	0.2724	0.115387	0.138062	0.0513066	0.24564	0.365372	0.224	0.263341	0.130649	0.141025	0.244349	0.0843	0.145811	0.142749	0.2052	0.0866685	0.090459	0.1602	0.123612	0.289838	0.1778	0.162882	0.175399	0.205509	0.0920339	0.452621	0.1385	0.158591	0.152375	0.134125	0.2632	0.287408	0.195731	0.1807	0.092317	0.17401	0.139953
20:4-LPI	619.289	9.358	0.962693	0.836927	1.1525	1.57165	1.5236	0.972037	1.22947	0.363323	1.51617	3.88855	1.1155	2.24013	0.831756	1.87688	2.57051	0.5597	0.778525	2.24472	1.1524	1.19678	0.515174	1.1898	1.22912	2.21713	0.7358	1.26414	0.792057	1.50735	1.13804	4.05008	0.7118	1.64672	1.1627	0.518834	1.5342	2.07068	1.1747	1.2189	0.852082	1.11062	1.53939
20:5-LPI	617.273	9.076	1.30098	0.358888	0.0158	0.0192478	0.006	0.00992789	0.0110319	0.00416253	0.0247951	0.0523101	0.0056	0.0241117	0.00905861	0.0236239	0.023941	0.0006	0.0149821	0.0112176	0.0094	0.00827191	0.00856258	0.0174	0.0242234	0.0279217	0.0026	0.0171859	0.0226606	0.0156983	0.0204579	0.0884491	0.0032	0.0143084	0.0208593	0.00969155	0.0196	0.0251256	0.0101208	0.006	0.00631409	0.0219774	0.0132737
22:4-LPI	647.32	9.937	1.16637	0.451886	ND	0.0411989	ND	0.0399457	0.0425439	0.00853771	0.0512134	0.0920504	ND	0.0496495	0.0216525	0.0512331	0.0605385	ND	0.0314695	0.0278615	ND	0.0200507	0.0176731	ND	0.0261102	0.0820509	ND	0.04284	0.0541736	0.0409082	0.0626786	0.109571	ND	0.0493533	0.024255	0.0246303	ND	0.0642783	0.0294049	ND	0.0154954	0.0342392	0.034357
22:5-LPI	645.305	9.522	1.02856	0.884595	0.1043	0.0370041	0.0819	0.0436265	0.0650512	0.00782073	0.0114543	0.177533	0.0991	0.078064	0.0219981	0.0834519	0.0887285	0.0289	0.0666443	0.0459146	0.0614	0.00997946	0.0452097	0.0643	0.0355773	0.0993906	0.0388	0.0327306	0.051682	0.0540706	0.0786992	0.156449	0.0599	0.0665744	0.0431613	0.0593727	0.0914	0.09384	0.0247528	0.0653	0.00811209	0.075557	0.0541748
22:6-LPI	643.289	9.308	1.00922	0.952939	0.2781	0.339866	0.1791	0.283534	0.456312	0.0815503	0.1892	0.587815	0.2321	0.265717	0.163453	0.332666	0.513789	0.1089	0.179193	0.183103	0.1639	0.14778	0.125212	0.1827	0.307697	0.420155	0.0799	0.314021	0.231374	0.339973	0.34512	0.452162	0.1899	0.337626	0.214307	0.196849	0.2141	0.285841	0.230411	0.1697	0.0754838	0.342918	0.18099
16:0/14:0-PI	781.487	15.32	1.05699	0.775089	0.243	0.216866	0.2574	0.28115	0.0823091	0.267119	0.171941	0.451525	0.1877	0.378261	0.204315	0.363909	0.291039	0.1401	0.227726	0.0264555	0.1686	0.0384532	0.691119	0.1704	0.0877891	0.314699	0.0921	0.178141	0.436006	0.154274	0.6632	0.208345	0.3109	0.172688	0.297105	0.288553	0.2001	0.507585	0.0937818	0.0761	0.267445	0.337782	0.360096
16:0/14:1-PI	779.472	14.305	0.974019	0.921213	0.026	0.0201115	0.0239	0.04226	0.00158043	0.0409182	0.0396269	0.078533	0.0116	0.0323292	0.0227047	0.0625631	0.0385203	0.0125	0.0170285	0.00170256	0.0175	0.00666961	0.0920679	0.0117	0.00404319	0.0724012	0.0094	0.0125337	0.0878765	0.0072221	0.0843934	0.0220267	0.043	0.0231403	0.0386051	0.0296724	0.0108	0.0443514	0.00692526	0.0047	0.0299454	0.0363573	0.0238913
16:0/16:0-PI	809.519	16.826	1.09006	0.653361	0.7159	1.66885	0.8843	1.64332	1.34839	1.58323	1.37674	2.67384	0.5998	2.913	1.62969	2.52593	2.4064	0.4344	1.51909	0.331002	0.699	0.418932	2.82438	0.6155	0.747853	1.3959	0.4516	1.50435	2.38885	1.59249	3.96282	1.93646	0.8719	1.31282	1.86706	1.83615	0.4914	3.39011	1.0082	0.2218	1.78331	2.49785	2.47663
16:0/16:1-PI	807.503	15.513	0.976108	0.907161	1.8326	2.57677	2.211	2.97882	0.742534	3.3143	2.86617	4.17911	1.1906	1.68635	1.62464	3.15102	1.96715	0.7218	0.894815	0.245289	1.613	0.628398	4.81963	0.8293	0.392441	4.75993	0.8429	1.09239	4.65528	1.21522	3.65625	1.81847	2.6427	1.41982	2.67155	1.40551	1.0076	4.22908	0.967247	0.5084	1.74415	2.78401	1.68027
16:0/18:2-PI	833.519	15.923	0.85493	0.390318	3.5157	11.0497	3.8506	7.22725	2.34092	10.4066	4.00172	8.24624	2.5388	3.0029	3.50043	4.27754	3.46332	3.0911	3.9772	4.35561	3.8878	2.7757	15.2073	1.6404	4.76016	8.57092	3.9902	4.31792	5.41395	3.89744	5.19845	3.16638	3.0747	5.48303	5.31769	7.39361	3.2524	4.95482	4.96412	3.0504	3.0249	4.06379	5.10209
16:0/18:3-PI	831.503	15.262	0.873532	0.523119	0.152	0.131143	0.1127	0.0931828	0.00980755	0.118678	0.138597	0.220901	0.0855	0.0341706	0.0323336	0.0756633	0.0750788	0.1053	0.0497757	0.0326506	0.1443	0.0227741	0.286737	0.0845	0.0453325	0.139704	0.1102	0.044277	0.178731	0.0411287	0.231446	0.126851	0.0905	0.0486315	0.0505372	0.130909	0.0797	0.0582235	0.0439952	0.0919	0.0417791	0.0525887	0.0757089
16:0/20:3-PI	859.534	16.451	0.989908	0.952402	0.4085	1.90795	0.8808	0.948812	0.48838	1.14939	1.84735	1.74392	0.582	0.872206	0.707875	0.939528	1.12522	0.4475	0.852351	0.840282	0.8205	0.544315	2.20551	0.3208	0.566535	2.7143	0.7434	0.819109	1.27704	0.852401	1.07825	1.21903	0.4579	0.966819	1.11779	1.04662	0.6526	1.64348	1.39636	0.3953	0.640315	0.930182	1.28547
16:0/20:4-PI	857.519	15.761	1.03639	0.837815	2.7613	8.25667	4.6672	7.02967	1.68439	4.77888	9.05252	8.22652	2.6418	4.00757	3.07155	4.23456	5.45204	2.1048	2.10001	2.56391	4.2291	2.10336	6.64086	2.105	3.12785	14.0042	2.4474	4.18858	6.60715	3.47566	5.91683	5.82647	3.1694	4.55211	5.00135	3.37907	3.5821	6.88066	4.57981	2.2934	3.26348	3.13162	5.85904
16:0/20:5-PI	855.503	14.998	0.956713	0.831076	0.0855	0.183995	0.082	0.135294	0.050129	0.181649	0.200709	0.385525	0.0585	0.0964467	0.0926159	0.338956	0.121531	0.0479	0.14557	0.0881065	0.0866	0.110585	0.377459	0.0814	0.124855	0.295302	0.0548	0.108329	0.172671	0.0722395	0.204697	0.266672	0.0683	0.075298	0.325577	0.203292	0.0907	0.185732	0.138222	0.0501	0.123687	0.170621	0.0768499
16:0/22:4-PI	885.55	16.987	1.03666	0.88153	0.110322	0.74667	0.1294	0.689703	0.217708	0.507483	0.83978	0.774659	0.1316	0.419013	0.219677	0.478966	0.523594	0.102	0.266879	0.208894	0.1584	0.179956	0.891131	0.0741	0.211463	1.45845	0.1109	0.334889	0.808518	0.348035	0.640562	0.500964	0.1206	0.453602	0.410338	0.32809	0.0621	0.829345	0.468731	0.06085	0.248662	0.362558	0.455964
16:0/22:5-PI	883.534	15.862	0.896124	0.630958	0.1433	2.55573	0.3194	1.97958	0.577675	2.04783	2.01125	2.58962	0.2619	1.0835	0.742303	1.07248	1.39901	0.2399	0.674922	0.794773	0.3706	0.553457	2.34984	0.2174	1.15773	3.22008	0.2205	1.05079	1.52805	1.01878	1.30315	1.29818	0.2954	1.18895	1.18321	0.951304	0.2973	1.38981	1.00381	0.1993	0.795643	1.08151	1.13171
16:0/22:6-PI	881.519	15.398	0.978153	0.893944	1.2323	3.03854	1.2468	2.70202	1.14504	2.44615	1.48061	3.63438	1.1338	1.25599	1.3273	1.53845	1.73237	0.862	0.980973	0.807283	1.1218	0.718328	3.47803	0.7036	1.41392	4.05619	0.7426	1.38914	1.81588	1.21635	2.18783	1.25391	1.0956	2.30211	2.15244	1.21799	1.1041	2.41597	1.54176	0.7808	1.52356	2.35095	1.56227
16:1/18:2-PI	831.503	14.748	0.760248	0.228221	ND	0.0710458	ND	0.0600278	0.00847363	0.0514369	0.0438272	0.0803567	ND	0.0240734	0.0308312	0.0302334	0.0222866	ND	0.0192229	0.0166259	ND	0.0129077	0.0811876	ND	0.0213083	0.0634015	ND	0.0168551	0.0443187	0.0205602	0.0409139	0.0236061	ND	0.0235689	0.0471387	0.0339396	ND	0.0223122	0.0165126	ND	0.0192905	0.0338934	0.0224498
18:0/16:0-PI	837.55	18.395	1.029	0.8982	0.3003	0.516096	0.3132	0.321237	0.596849	0.204892	0.320949	0.887305	0.2083	1.21275	0.354883	0.715885	0.660303	0.1621	0.537913	0.141196	0.1929	0.134119	0.961449	0.1597	0.206183	0.196434	0.1642	0.379648	0.529362	0.490664	0.645262	0.663277	0.2432	0.32213	0.373744	0.508087	0.2032	1.19893	0.234618	0.1186	0.581412	1.1821	1.06887
18:0/16:1-PI	835.534	16.824	0.942441	0.813594	ND	6.87364	0.2319	5.50414	3.06954	6.09493	4.28056	8.25494	0.2094	4.77964	3.12839	6.32642	5.00495	0.1174	2.75822	1.36472	0.2646	1.64844	9.08002	0.1227	1.8514	8.13582	0.1534	3.35152	6.87843	3.62495	3.3525	3.38172	0.4148	3.72929	5.65857	3.44022	0.1574	10.8659	4.75995	0.0757	2.81176	5.44366	4.03564
18:0/18:1-PI	863.566	18.61	1.01088	0.950298	0.7651	2.82429	0.9279	2.00274	1.75225	3.1507	1.18567	2.8896	0.6342	2.18966	1.36172	2.32525	1.99485	0.5669	1.48843	1.33409	0.5599	0.981153	3.09255	0.5181	1.52476	1.96965	0.866	1.55535	1.82515	1.5232	0.747048	1.26802	0.8826	1.93777	2.49285	2.26688	0.721	3.66071	4.03439	0.5955	1.31531	2.27483	2.10037
18:0/18:2-PI	861.55	17.439	0.804696	0.268793	2.3233	11.6598	3.6894	7.27978	3.80422	10.0315	3.58449	13.8221	2.4706	5.4979	3.49661	6.13805	5.41198	4.1397	5.15104	10.705	3.8837	4.26349	19.3646	1.707	5.76466	8.29325	4.5987	3.83252	4.2265	4.56039	1.90814	3.97228	2.7266	7.19532	7.73551	9.26916	3.998	8.19334	7.62004	3.544	4.34252	5.36968	8.47795
18:0/18:3-PI	859.534	16.267	1.17569	0.482729	ND	0.427776	ND	0.288782	0.194145	0.3705	0.653549	0.341205	ND	0.279632	0.15914	0.331232	0.349845	ND	0.15122	0.0994075	ND	0.0956991	0.425133	ND	0.135639	0.892064	ND	0.220088	0.702006	0.281308	0.404417	0.517102	ND	0.220044	0.252431	0.182116	ND	0.673785	0.221756	ND	0.138924	0.230028	0.177668
18:0/20:2-PI	889.581	19.059	1.12562	0.61298	0.037	0.325796	0.123	0.102632	0.133786	0.250238	0.2477	0.232111	0.0545	0.20573	0.122575	0.144173	0.165107	0.0737	0.163227	0.130136	0.0527	0.093592	0.190244	0.0559	0.16292	0.728576	0.1688	0.142382	0.125215	0.167145	0.0607141	0.116213	0.0389	0.126344	0.191891	0.145186	0.109	0.278758	0.180563	0.0625	0.121438	0.160193	0.231786
18:0/20:3-PI	887.566	17.956	0.988611	0.953269	0.7356	4.68127	1.5473	1.73988	1.38081	3.78259	4.23253	3.27612	1.0118	2.68847	1.64283	2.39121	2.14153	0.7045	1.66054	2.3055	1.3474	1.09914	4.21943	0.6878	1.4638	6.78513	2.0961	2.02072	2.06836	2.10631	0.496583	2.58497	0.8208	2.18906	3.298	1.67777	1.3097	4.52296	3.10323	0.8783	1.31801	2.21459	2.67714
18:0/20:4-PI	885.55	17.18	1.01274	0.939531	5.8889	21.3064	7.5494	11.8869	6.25873	16.0045	14.845	15.9655	6.4829	13.3743	7.55017	11.1792	16.3535	4.1026	8.41508	15.1282	7.5935	7.53726	15.2225	6.0109	10.3188	33.0422	7.0143	9.71915	7.21002	7.36971	5.22097	11.7556	7.4062	16.1561	13.8129	7.40108	7.2506	21.0112	15.8774	5.0474	9.64829	8.42799	16.9868
18:0/20:5-PI	883.534	16.624	1.15883	0.412927	ND	0.737109	ND	0.568683	0.334579	0.487748	0.750425	0.871187	ND	0.65519	0.473642	0.617804	0.76999	ND	0.439075	0.178849	ND	0.239839	0.963121	ND	0.307536	1.56029	ND	0.335849	0.681644	0.377491	0.714841	0.759422	ND	0.7189	0.835922	0.239913	ND	1.23546	0.646838	ND	0.430033	0.597206	0.599831
18:0/22:4-PI	913.581	18.495	1.07097	0.762126	0.0461	0.418882	0.1493	0.310952	0.239775	0.46663	0.417359	0.338588	0.0876	0.318673	0.192882	0.342432	0.278758	0.0743	0.204505	0.197075	0.1015	0.131062	0.39317	0.0332	0.15939	1.01973	0.1951	0.192491	0.246415	0.226844	0.117878	0.267371	0.0819	0.340199	0.352351	0.14205	0.1085	0.635327	0.295704	0.1318	0.16821	0.260845	0.333933
18:0/22:5-PI	911.566	18.308	1.11119	0.608377	0.1232	0.451864	0.3623	0.291275	0.372381	0.64833	0.39849	0.408016	0.2403	0.577021	0.21903	0.557266	0.427927	0.1686	0.329084	0.194799	0.263	0.168603	0.575852	0.1968	0.227287	1.11004	0.3109	0.232094	0.307228	0.289792	0.201476	0.339946	0.3206	0.568165	0.53345	0.156095	0.2707	1.32897	0.379997	0.2017	0.231572	0.327314	0.393134
18:0/22:6-PI	909.55	16.892	0.980476	0.901659	0.5821	2.29256	1.0355	1.82589	2.06319	2.12222	0.931568	3.12128	1.0809	1.5114	1.09234	1.68831	2.01472	0.7169	1.38603	0.88686	0.932	0.922218	3.12881	0.6821	1.07727	2.95166	1.1618	1.08218	1.03965	1.37101	0.972212	1.13336	0.8565	2.26027	1.8099	1.1182	0.9875	3.47479	1.69975	0.8833	1.42706	2.50145	1.78588
18:1/18:1-PI	861.55	17.251	0.965952	0.830864	0.8774	1.25054	0.2497	0.883882	0.493671	0.620089	0.682191	0.901883	0.19785	0.792843	0.514535	0.66044	0.73468	ND	0.474815	0.664853	0.0811	0.3906	0.748721	0.2626	0.601597	1.11796	0.16725	0.747103	0.692865	0.723554	0.346987	0.520061	0.1378	0.753966	0.888582	0.722378	0.1708	0.936583	1.20321	0.1463	0.418692	0.827292	0.65641
18:1/18:2-PI	859.534	16.029	0.848691	0.39202	0.3128	2.92334	0.6221	1.29113	0.385334	1.10543	0.762862	1.61796	0.3617	0.779063	0.60904	0.648739	0.660757	0.6454	0.75418	1.4512	0.3802	0.675096	1.87399	0.2269	1.15115	1.22058	0.743	0.765088	0.754434	0.846127	0.64802	0.638703	0.3344	1.06565	0.981802	1.36345	0.3844	0.71959	1.0573	0.8047	0.572444	0.889606	0.788345
18:1/20:4-PI	883.534	15.862	0.96068	0.847469	0.6579	0.321181	0.9813	0.273862	0.153763	0.301747	0.225739	0.429381	0.5977	0.167712	0.0860093	0.180057	0.535726	0.636	0.219384	0.429931	0.7207	0.264357	0.313556	0.504	0.243671	0.45091	0.7378	0.22746	0.21649	0.0914434	0.209609	0.156647	0.8288	0.218561	0.135998	0.171075	0.74525	0.207118	0.764287	0.689	0.201702	0.0957317	0.68472
18:1/20:5-PI	881.519	15.293	0.989033	0.962116	ND	0.0897707	ND	ND	ND	0.0860539	0.079452	0.244554	ND	0.109536	0.219766	0.44388	0.237119	ND	0.145613	0.331125	ND	0.210513	0.207004	ND	ND	0.163997	ND	0.0184769	0.0913183	0.0571101	0.16457	0.260624	ND	0.0488668	0.400386	0.227155	ND	0.434101	0.262717	ND	0.200097	0.170242	0.274694
18:1/22:6-PI	907.534	15.549	0.943686	0.703621	0.0542	0.194058	0.0694	0.135749	0.0550208	0.079376	0.0818075	0.206994	0.0389	0.100955	0.0806318	0.0800323	0.0934275	0.0617	0.0623408	0.0683651	0.0539	0.0517587	0.128423	0.038	0.0616481	0.15513	0.0452	0.0516143	0.0708769	0.0747672	0.0856902	0.0749917	0.0772	0.118461	0.134715	0.0555057	0.0693	0.121528	0.102082	0.0485	0.0810893	0.143691	0.0757712
20:0/20:4-PI	913.581	19.026	1.12149	0.571687	ND	0.0895607	ND	0.051656	0.0249135	0.0548236	0.0628702	0.0832221	ND	0.0401289	0.0232265	0.025098	0.0444152	ND	0.0238088	0.0480127	ND	0.0257787	0.0871694	ND	0.051802	0.160657	ND	0.0548343	0.0634575	0.0392711	0.0369347	0.0610034	ND	0.0437164	0.0295638	0.0510879	ND	0.0469033	0.0439114	ND	0.0381568	0.0323121	0.0691021
d18:0/16:0-Cer	540.535	19.573	0.915609	0.578069	0.0214	ND	0.0798	ND	ND	ND	ND	0.0651258	0.04	0.0409552	0.0399197	0.046471	0.0425256	0.0273	0.0213443	0.0233543	0.019	0.0180896	0.0454187	0.0262	ND	ND	0.0532	ND	ND	ND	0.0415653	0.0605746	0.0312	0.0415459	0.0320398	0.0192544	0.0248	0.0374339	0.0307058	0.0227	0.0332343	0.0395463	0.026626
d18:0/20:0-Cer	596.598	21.979	0.897229	0.524576	0.0197	0.0185074	0.0298	0.0108163	0.0265369	0.0183982	0.00849378	0.0290243	0.0284	0.00989433	0.0189641	0.011237	0.0226687	0.0159	0.0119646	0.00502684	0.0163	0.00891336	0.0155582	0.0147	0.0113096	0.0150627	0.0241	0.0100115	0.0115305	0.0100197	0.010688	0.0363306	0.0206	0.00309192	0.0159184	0.00573879	0.0358	0.0297114	0.00672197	0.0094	0.00806108	0.0199166	0.00927665
d18:0/22:0-Cer	624.629	23.003	0.979302	0.892833	0.0354	0.0712024	0.1214	0.0339426	0.10885	0.0340163	0.0352556	0.14265	0.1317	0.0563694	0.0712405	0.069167	0.100447	0.0432	0.0767418	0.0498732	0.0594	0.0669457	0.102961	0.0388	0.0403975	0.0346664	0.1229	0.0538395	0.040391	0.0627631	0.0864415	0.144757	0.0652	0.0543414	0.0711806	0.0762582	0.1523	0.118058	0.0370028	0.0356	0.0594034	0.0909249	0.0690513
d18:0/24:0-Cer	652.66	23.876	0.890623	0.52166	0.2273	0.11125	0.2669	0.0521755	0.199853	0.0195447	0.0552352	0.32482	0.2092	0.108724	0.109581	0.145243	0.20501	0.0976	0.10661	0.0517462	0.132	0.0796829	0.218327	0.0971	0.056739	0.0615861	0.2188	0.0899539	0.0649008	0.110393	0.132723	0.272837	0.126	0.108502	0.097064	0.110599	0.2854	0.197724	0.055274	0.083	0.112613	0.161723	0.107817
d18:0/24:1-Cer	650.645	22.959	0.995866	0.982675	0.14929	0.116854	0.28858	0.0925552	0.209758	0.19484	0.107825	0.486416	0.258157	0.101978	0.268557	0.118669	0.285467	0.105528	0.169612	0.0527342	0.107224	0.102538	0.124825	0.153954	0.0784294	0.194114	0.20675	0.0708942	0.0736474	0.162028	0.112702	0.231977	0.141421	0.158674	0.276222	0.0891682	0.269455	0.439908	0.13981	0.0866532	0.125214	0.394104	0.0976063
d18:0/24:2-Cer	648.629	22.137	0.979109	0.970268	2.4645	ND	2.6589	ND	ND	ND	ND	0.0525158	2.0603	0.0170649	0.0402079	0.0293661	0.0246221	0.8917	0.015626	0.0117041	1.2221	0.0155014	0.0300517	1.1893	ND	ND	2.13	ND	ND	ND	0.0262898	0.030914	2.6252	0.0180152	0.0374622	0.0147698	2.737	0.036148	0.0288474	1.0677	0.0167985	0.0281428	0.0151805
d18:1/16:0-Cer	538.519	18.673	0.848996	0.530128	0.0463	0.0133662	0.1803	0.0146222	0.012339	0.583954	0.0144706	0.257047	0.1434	0.113546	0.194045	0.22601	0.147571	0.081	0.133231	0.1553	0.1132	0.148087	0.170932	0.0698	0.0131337	0.0195479	0.1831	0.00990695	0.00837995	0.010798	0.187867	0.210305	0.1129	0.184285	0.197445	0.143454	0.253	0.174688	0.155818	0.0892	0.117779	0.179584	0.135485
d18:1/18:0-Cer	566.551	20.211	1.03056	0.864491	0.0374	0.0371762	0.09	0.0439219	0.0333261	0.107926	0.0194606	0.194045	0.1091	0.0481886	0.124478	0.114137	0.0767426	0.0484	0.0664463	0.0607752	0.0886	0.106106	0.0677003	0.0513	0.0258666	0.0335218	0.132	0.0166452	0.0188311	0.0297804	0.102592	0.156688	0.0988	0.105084	0.135636	0.0678279	0.1478	0.124049	0.0652437	0.0642	0.066665	0.0757718	0.0806156
d18:1/20:0-Cer	594.582	21.541	1.06967	0.716998	0.1303	0.0479537	0.119	0.0381281	0.0486855	0.0342091	0.0299139	0.258567	0.1524	0.115679	0.193275	0.187889	0.118126	0.0781	0.122295	0.15145	0.1267	0.190008	0.170429	0.074	0.0347142	0.0257999	0.1831	0.0207174	0.0256992	0.030063	0.233085	0.312125	0.1678	0.159395	0.176229	0.135831	0.2295	0.186492	0.10988	0.0899	0.117018	0.125145	0.167993
d18:1/22:0-Cer	622.613	22.63	0.928931	0.632171	0.9849	0.454184	0.7688	0.444932	0.483927	0.291869	0.365814	1.62061	0.8806	0.500351	0.610772	1.00954	0.642692	0.362	0.612944	0.597662	0.7423	0.647039	0.919205	0.3479	0.379464	0.200301	0.8451	0.387701	0.275591	0.306349	1.20978	1.02854	0.7828	0.629195	0.549424	0.878551	1.3255	0.784088	0.392922	0.5092	0.458853	0.569936	0.791956
d18:1/24:0-Cer	650.645	23.556	0.968543	0.849477	4.1236	1.53646	3.0475	1.19197	1.79433	0.224146	1.34693	4.7667	2.5828	2.07941	1.81675	3.79343	1.92624	1.3449	1.83358	1.78201	2.4438	1.78447	3.27499	1.0951	1.27933	0.71454	3.1585	1.51022	0.96498	1.04135	3.94617	3.36072	3.7052	1.85613	1.46246	2.70187	5.1209	2.53542	1.0466	1.6047	1.7635	1.97636	2.68334
d18:1/24:1-Cer	648.629	22.569	0.985456	0.925039	2.59805	0.891628	2.753	1.23118	1.11936	1.00731	1.1532	4.05667	2.3391	1.14074	1.94965	1.48622	1.57131	0.9741	1.48413	0.992043	1.4666	1.55003	0.97075	1.284	0.825456	0.947939	2.5319	0.67415	0.517568	0.841434	2.04734	1.63067	2.662	1.75319	1.8257	1.56863	3.2952	2.34576	1.26053	1.2273	1.06832	2.11712	1.45795
d18:2/22:0-Cer	620.598	21.73	0.888069	0.422334	0.0839	0.09451	0.109	0.108532	0.0573939	0.109586	0.0657014	0.124228	0.1231	0.0376044	0.0425907	0.0663292	0.0270136	0.0497	0.0458442	0.0834949	0.1124	0.0636284	0.055277	0.0451	0.0793816	0.0501219	0.1262	0.0605143	0.0483429	0.0425311	0.061616	0.0519236	0.1322	0.0604083	0.0386172	0.0898877	0.1615	0.0442597	0.0647248	0.0742	0.027484	0.0338397	0.0718135
d18:2/24:0-Cer	648.629	22.791	0.900739	0.486961	0.290597	0.361155	0.369572	0.33897	0.213814	0.352985	0.236808	0.966798	0.314419	0.29478	0.294548	0.477971	0.214232	0.146367	0.342281	0.446125	0.365819	0.320061	0.393488	0.0906291	0.243501	0.211287	0.432068	0.24359	0.197001	0.121988	0.632476	0.339349	0.386811	0.426524	0.298363	0.465178	0.56461	0.383739	0.26116	0.25175	0.196538	0.220285	0.42441
d18:2/24:1-Cer	646.613	21.701	0.869359	0.332872	0.3353	0.311681	0.42	0.361544	0.229489	0.235603	0.210823	0.36136	0.3288	0.129131	0.165767	0.126521	0.0897718	0.1835	0.159177	0.195354	0.2648	0.226172	0.155226	0.1095	0.186152	0.209323	0.4221	0.137628	0.105168	0.151367	0.227182	0.155888	0.3243	0.230981	0.180788	0.175627	0.5039	0.162081	0.137578	0.2046	0.104232	0.163809	0.216677
d18:1/16:0-Hex1Cer	700.572	16.84	1.07261	0.581133	0.1102	0.495037	0.5066	0.414295	0.691524	0.469579	0.32285	0.873611	0.7749	0.289543	0.467021	0.516519	0.552023	0.3755	0.282437	0.33894	0.4604	0.252229	0.467983	0.4321	0.423479	0.650596	0.4583	0.55993	0.347184	0.367906	0.426495	0.454151	0.5917	0.597835	0.497688	0.283543	1.1879	0.441476	0.395559	0.3921	0.398664	0.465042	0.40735
d18:1/18:0-Hex1Cer	728.603	18.611	1.14758	0.262784	0.017004	0.0631431	0.0206641	0.0830477	0.0634124	0.0599608	0.0350133	0.104521	0.0316078	0.0371454	0.0656818	0.0637405	0.0568987	0.0301748	0.0379369	0.0438726	0.0312314	0.0309058	0.0557373	0.0368439	0.0326349	0.0642628	0.0406108	0.0676902	0.0489848	0.0571738	0.0646645	0.056455	0.102059	0.0665428	0.0609147	0.0510859	0.0743133	0.0586597	0.0411718	0.0254059	0.063994	0.0518418	0.0601673
d18:1/22:0-Hex1Cer	784.666	21.35	1.00922	0.954856	0.788	0.668022	1.041	0.50505	0.449014	0.516931	0.397344	1.09821	1.2203	0.459653	0.561386	0.698743	0.725313	0.6193	0.393077	0.600724	1.1085	0.414583	0.946997	0.4899	0.442269	0.332452	0.9231	0.588975	0.420522	0.396035	0.856378	0.663113	1.4254	0.574112	0.532927	0.403768	2.1263	0.582971	0.457534	0.9821	0.547188	0.638063	0.652616
d18:1/24:0-Hex1Cer	812.697	22.408	1.02367	0.893827	1.4364	1.00783	1.8975	0.620972	0.855239	0.262425	0.61191	1.39186	1.8661	0.712284	0.77006	1.17812	0.905625	0.9596	0.548675	0.776626	1.7451	0.539657	1.17314	0.7026	0.529361	0.5729	1.4543	1.01979	0.584692	0.653793	1.12342	0.985316	2.4042	0.896309	0.682661	0.494807	2.9651	0.783333	0.681068	1.523	0.729428	0.958221	1.00831
d18:1/24:1-Hex1Cer	810.682	21.316	1.15044	0.332123	1.0363	0.91514	1.8047	1.08163	1.07119	0.647815	0.733421	2.72544	2.1645	0.755851	1.42665	1.02393	1.37806	0.984	0.791667	0.735731	0.835	0.594032	0.854792	1.3303	0.760156	1.70899	1.0275	1.10971	0.642946	0.947271	1.24602	1.01447	2.5491	1.64296	1.45965	0.760161	2.6622	1.27104	1.16066	1.284	1.01543	1.49933	1.01683
d18:2/24:0-Hex1Cer	810.682	21.567	1.20597	0.411053	0.0531	ND	0.2359	ND	ND	ND	ND	0.105312	0.1944	0.0873424	0.0799426	0.128482	0.0594538	0.102	0.0822599	0.12889	0.1941	0.0691725	0.0958029	0.0609	ND	ND	0.1934	ND	ND	ND	0.105671	0.0944141	0.3481	0.121339	0.0863903	0.0688857	0.3634	0.0980826	0.113605	0.1389	0.0974964	0.072294	0.125377
d18:1/14:0-Hex2Cer	834.594	14.535	0.99564	0.981139	1.42402	1.43491	1.51344	0.682315	0.650883	0.511174	0.76447	3.28002	0.729894	0.500225	1.23452	0.903607	0.994036	1.19879	0.444209	0.81157	0.63265	0.427354	0.904497	0.670094	0.641283	2.44744	0.552171	0.75694	0.589104	0.665344	1.11622	1.39607	1.06653	1.3374	1.26333	0.740454	1.49034	1.07715	0.441389	0.72207	0.779924	1.52135	0.682823
d18:1/16:0-Hex2Cer	862.625	16.066	0.947231	0.62258	1.47625	0.922909	1.39703	0.828141	1.02308	0.871842	1.04871	2.0953	0.726408	0.584077	1.15476	0.998922	1.17045	0.841492	0.578413	1.02358	0.89281	0.685742	1.20855	0.40114	0.792984	1.57385	0.66171	1.01882	0.635463	1.06553	0.96184	0.989761	1.29079	1.03183	1.40832	0.685385	1.58139	0.964941	0.666931	0.730978	0.984886	1.29094	0.734068
d18:1/18:0-Hex2Cer	890.656	17.848	1.00005	0.999744	ND	0.85898	ND	0.906086	1.20785	0.640894	0.680706	1.94813	ND	0.958414	1.16903	1.19108	1.57642	ND	0.810208	0.650034	ND	0.348945	1.05285	ND	0.528534	0.5026	ND	0.907636	0.529621	0.63128	1.23485	1.10414	ND	2.0593	0.723096	0.994395	ND	1.50303	0.567985	ND	1.60466	1.16496	0.944308
d18:1/22:0-Hex2Cer	946.719	20.713	0.923283	0.496691	0.95086	0.922599	1.20911	0.66522	1.20188	0.632122	0.858202	2.10178	0.654572	0.971786	0.944869	1.00918	1.49854	0.936026	0.71142	1.05768	1.19922	0.554418	1.69862	0.412673	0.948391	0.580138	0.751559	0.930332	0.491095	0.850285	1.0338	1.21927	1.71573	1.175	0.908876	0.990048	1.50578	1.06636	0.579498	0.664461	1.27342	1.1829	0.94227
d18:1/24:0-Hex2Cer	974.75	21.828	0.943486	0.636431	1.5475	1.21137	1.34263	0.825214	1.36072	0.17683	0.877158	1.88175	0.601939	1.03155	0.910259	0.818697	1.32938	0.709171	0.673906	1.01023	0.993182	0.611499	1.65409	0.363493	0.937873	0.566724	0.765699	1.14934	0.525122	1.19576	0.961368	1.20733	1.61294	1.20668	0.927321	0.870985	1.44369	0.924129	0.52704	0.619754	1.33849	1.24636	1.04282
d18:1/24:1-Hex2Cer	972.735	20.706	1.00981	0.937839	1.43629	1.16263	1.26979	1.04681	1.16581	0.592904	1.18497	1.95816	0.680662	0.578	1.23665	0.699992	1.32678	0.692268	0.701156	1.0761	0.69329	0.555196	0.847414	0.564165	0.721399	1.61393	0.629859	1.19037	0.549513	0.870022	0.771934	0.790318	1.58695	1.6628	1.24946	0.877132	1.76673	0.840213	0.672689	0.680005	1.0958	1.3677	0.594151
d18:1/24:2-Hex2Cer	970.719	19.71	0.951204	0.731628	1.10215	1.95063	1.47396	1.09453	0.909261	0.568175	0.90281	1.63092	0.707633	0.502354	0.884517	0.487073	0.935891	0.976855	0.527585	1.87242	1.01513	0.566635	1.37912	0.497614	0.776489	2.23665	0.700487	1.11054	0.460784	1.19801	0.849971	0.912176	0.964861	1.59206	0.927246	1.11907	1.76564	0.525564	0.555755	0.795672	1.0562	0.887015	0.580552
d18:2/16:0-Hex2Cer	860.609	14.828	0.837765	0.242063	2.03356	2.05376	1.4729	1.16237	0.997618	1.10031	1.27015	2.17823	0.841416	0.417358	0.663156	0.80042	0.878941	0.608827	0.386406	1.51392	0.847625	0.683675	0.81356	0.365665	0.808345	2.03212	0.631817	0.855618	0.699597	0.926194	1.06551	0.815455	1.05706	1.40124	1.09547	0.659391	1.41551	0.814623	0.866241	0.725625	0.672343	0.784656	0.583328
d18:1/14:0-Hex3Cer	996.647	14.119	0.959336	0.770264	0.009	0.016703	0.016	0.0102499	0.0109698	0.00730165	0.00617	0.0324406	0.0128	0.0126535	0.0122799	0.0189854	0.0223369	0.0126	0.0108914	0.00982822	0.0091	0.00822821	0.0189562	0.0084	0.0124344	0.0187074	0.0081	0.00760143	0.00470338	0.00943144	0.0174352	0.0190882	0.0125	0.0225771	0.0125061	0.0101794	0.0237	0.0100623	0.00871284	0.0099	0.0193705	0.0114357	0.0131799
d18:1/16:0-Hex3Cer	1024.68	15.558	0.934037	0.608807	0.171	0.333998	0.1774	0.302742	0.371268	0.230564	0.209076	0.642048	0.2202	0.213105	0.308089	0.443517	0.517816	0.1449	0.242157	0.216419	0.1806	0.150004	0.381674	0.0997	0.288603	0.291314	0.1529	0.269948	0.184778	0.30541	0.321148	0.332775	0.2175	0.467594	0.253187	0.189686	0.2825	0.287855	0.272228	0.1289	0.408475	0.294629	0.315759
d18:1/16:1-Hex3Cer	1039.69	14.378	0.808387	0.367554	ND	0.00680599	ND	0.00435746	0.00489369	ND	0.00233282	0.0169467	ND	0.00307153	0.00519892	0.00687027	0.00823717	ND	0.00270719	0.0058972	ND	0.00386828	0.00330314	ND	0.00453883	ND	ND	0.00346374	0.00209659	ND	0.00324254	0.00596073	ND	0.0100129	0.00542028	0.00329485	ND	0.00370127	0.00566434	ND	0.00383481	0.00443398	0.00455214
d18:1/24:1-Hex3Cer	1134.79	20.234	0.993571	0.976956	0.3576	0.163111	0.3503	0.140788	0.158691	0.0616493	0.0840136	ND	0.3412	ND	ND	ND	ND	0.3323	ND	ND	0.3836	ND	ND	0.3566	0.164535	0.183874	0.2959	0.114612	0.0796022	0.168973	ND	ND	0.3438	ND	ND	ND	0.3643	ND	ND	0.2858	ND	ND	ND
d18:2/16:0-Hex3Cer	1022.66	14.378	0.811239	0.377534	0.0168	0.0430472	0.0257	0.031239	0.020665	0.0197383	0.0174237	0.146356	0.0212	0.0243771	0.0405802	0.0578814	0.0678567	0.0154	0.0253642	0.0432648	0.0193	0.0339284	0.0276947	0.0089	0.0212545	0.0309702	0.0158	0.0189252	0.0137711	0.017199	0.0311451	0.0493626	0.0185	0.0762527	0.0407874	0.0323134	0.0314	0.0318492	0.0428925	0.0156	0.0283391	0.0355136	0.0351155
d18:1/16:0-CerG3GNAc1	1227.76	15.005	0.870731	0.42567	0.1801	ND	0.1617	ND	ND	ND	ND	0.633579	0.1845	0.184326	0.273696	0.35816	0.355738	0.1445	0.221178	0.240186	0.1584	0.164449	0.30905	0.0916	ND	ND	0.1433	ND	ND	ND	0.267367	0.335539	0.1995	0.365805	0.306844	0.151331	0.2352	0.226088	0.175157	0.1096	0.257578	0.251129	0.214099
d18:1/24:0-CerG3GNAc1	1339.88	20.948	0.831314	0.294439	ND	0.0226049	ND	0.0125389	0.0221592	ND	0.0105617	0.0498822	ND	0.0225234	0.0207153	0.0320358	0.0418613	ND	0.0190172	0.0215038	ND	0.0126719	0.0352289	ND	0.0171212	0.00860562	ND	0.0203413	0.00905264	0.017567	0.0340556	0.034369	ND	0.0307493	0.0183303	0.0104746	ND	0.0209359	0.0149658	ND	0.0263848	0.022792	0.0243713
d18:1/24:1-CerG3GNAc1	1337.87	19.722	1.02718	0.883765	0.01935	0.0622215	0.0176	0.0754243	0.0701368	0.0347366	0.0390704	0.189589	0.0316	0.0755443	0.100483	0.0823325	0.15097	0.0256	0.0849972	0.0757429	0.0231	0.0639045	0.0854689	0.0283	0.0698298	0.0742572	0.0172	0.0549553	0.0394046	0.0901113	0.091532	0.091532	0.0451	0.15133	0.0958223	0.0668361	0.0362	0.0877613	0.0894324	0.0194	0.101875	0.103511	0.0597309
d18:2/16:0-CerG3GNAc1	1225.74	13.953	0.862812	0.187634	0.0211	0.0421249	0.0244	0.0244116	0.01994	0.0213768	0.0219616	0.0447335	0.0274	0.0130164	0.0244082	0.0248148	0.0355195	0.0155	0.012736	0.027988	0.0227	0.026609	0.0234604	0.0084	0.0216134	0.0310053	0.0159	0.022901	0.0137548	0.0221066	0.0263101	0.0280887	0.0224	0.0374557	0.0201209	0.017272	0.0368	0.0213453	0.0128421	0.0159	0.0183618	0.017987	0.0201151
d14:0/18:1-SM	675.544	14.972	1.17217	0.332009	N.D.	0.846468	N.D.	0.754432	0.367986	0.512181	0.97017	1.57953	N.D.	1.39869	1.34887	1.37707	0.479708	N.D.	0.65062	0.496757	N.D.	0.82341	1.24929	N.D.	0.431376	0.854634	N.D.	0.650911	1.36014	1.18615	2.28269	1.08636	N.D.	0.737472	1.44499	0.987635	N.D.	0.940776	0.664591	N.D.	1.20468	1.51314	0.799289
d18:2/16:0-SM	701.559	15.282	1.0312	0.790482	0.953511	0.805824	1.74559	1.09463	0.439558	0.693689	1.46496	1.52214	0.834207	0.954491	1.33879	1.01283	0.425527	0.852962	0.573751	1.08464	0.997922	1.25034	0.655404	0.481083	0.5448	0.620271	0.998754	0.665253	1.54635	1.22938	1.26258	0.786318	0.916129	0.816717	1.3133	0.933917	1.23499	0.967768	1.56498	0.984851	0.927063	1.7684	0.736321
d18:1/16:0-SM	703.575	16.633	1.14707	0.230197	0.717101	0.819622	1.39027	1.14557	0.657888	0.664159	1.45576	1.00709	0.88068	1.15597	1.31128	1.05578	0.315808	0.988051	0.750401	0.583382	0.926085	1.14258	0.700004	0.712527	0.484411	0.969037	1.13743	0.878405	2.05699	1.79804	0.818861	0.818447	0.959441	0.71153	1.32182	0.845385	1.25158	1.00968	1.13257	1.03683	0.893433	1.7266	0.769485
d18:0/16:0-SM	705.591	17.419	1.21971	0.0625547	1.26692	0.53167	1.10027	0.648718	0.604368	0.434217	0.66168	1.13224	1.05053	1.2307	1.58179	1.02433	0.575245	1.1521	0.869713	0.675826	0.762693	0.887383	1.01701	0.826719	0.648868	0.755706	0.87199	0.700827	1.33813	1.57853	1.55803	1.05818	0.925268	0.918322	1.5397	1.03303	1.28635	1.32727	1.08235	0.757153	1.00521	1.90437	0.97659
d18:2/18:1-SM	727.575	15.718	0.998352	0.990086	1.08796	1.14893	1.08878	0.919862	0.744392	1.11762	1.27821	N.D.	0.711391	N.D.	N.D.	N.D.	N.D.	0.9754	N.D.	N.D.	0.935696	N.D.	N.D.	0.354468	1.02492	0.653537	1.09042	0.671397	1.44362	0.997504	N.D.	N.D.	0.936515	N.D.	N.D.	N.D.	1.564	N.D.	N.D.	1.25537	N.D.	N.D.	N.D.
d18:1/18:1-SM	729.591	17.089	1.09155	0.43478	0.435549	0.844623	1.13411	1.46591	0.798839	0.630365	1.38787	1.15136	0.989562	1.20962	1.2188	0.917722	0.328845	0.908288	0.596095	0.936273	1.1893	1.42517	0.579648	0.503706	0.56951	0.867368	1.42414	0.741324	1.64716	1.69221	1.03733	0.760778	0.963738	0.725102	1.38595	0.801521	1.32647	1.11096	1.26634	1.12513	0.780702	1.43988	0.682725
d18:1/18:0-SM	731.606	18.553	1.18785	0.120707	0.773137	0.657741	1.01783	1.13554	0.78314	0.826633	1.64006	1.29139	0.909904	0.819718	1.48042	0.795999	0.314119	0.923509	0.577474	0.571424	1.00389	1.08274	0.725808	0.688508	0.502334	0.957891	1.27454	0.903783	1.74951	1.74653	1.20822	0.806688	1.05943	0.747628	1.55963	0.776782	1.32232	1.18825	0.979364	1.02694	1.07403	1.43466	0.662501
d18:1/22:2-SM	783.637	19.027	1.06442	0.65909	N.D.	1.20223	N.D.	1.15281	0.494006	0.624246	0.988309	1.32851	N.D.	0.953272	1.52268	0.775056	0.375895	N.D.	0.727339	1.13421	N.D.	1.28151	0.98846	N.D.	0.552144	0.797255	N.D.	0.654092	1.13946	1.40312	2.11235	0.64606	N.D.	0.663649	1.44137	1.04213	N.D.	0.794631	1.0113	N.D.	1.09379	1.34821	0.751916
d18:1/22:1-SM	785.653	20.547	1.01419	0.903208	1.42565	0.886048	1.44102	1.12066	0.518984	0.757788	1.40232	1.20842	0.800633	1.15073	1.32523	0.910461	0.281806	0.919383	0.551906	1.39492	0.618545	1.37119	0.777085	0.973136	0.651628	0.762135	0.870637	0.859146	1.93589	1.53323	1.48294	0.700122	0.966246	0.577671	1.24708	1.26812	1.19851	0.959378	1.11214	0.78624	0.445482	1.06654	0.740978
d18:1/22:0-SM	787.669	21.698	1.1328	0.314022	0.917908	0.61906	1.2125	0.718791	0.566145	0.681229	1.45069	1.2547	0.977334	1.12294	1.39297	0.967334	0.338859	0.859669	0.655027	0.836585	1.22074	0.985358	1.01073	0.523013	0.544718	0.525076	1.10454	0.74708	1.58977	1.4585	2.37449	1.05095	0.999648	0.594914	1.41371	1.10309	1.2758	1.10997	0.937648	0.908849	0.753869	1.43465	0.761131
d18:0/22:0-SM	789.684	22.246	1.16403	0.382395	N.D.	0.606209	N.D.	0.689357	0.782664	0.942322	1.00278	1.78175	N.D.	0.950786	1.4457	0.865504	0.919935	N.D.	0.601579	0.350776	N.D.	0.690986	1.27474	N.D.	0.44744	0.531253	N.D.	0.841786	1.27567	2.30268	1.19497	1.26747	N.D.	0.682132	0.981336	0.764566	N.D.	1.46409	0.929144	N.D.	0.849213	2.01648	0.54669
d18:1/24:4-SM	807.637	18.374	1.08346	0.756109	N.D.	0.348606	N.D.	0.395192	0.188531	0.300056	0.391845	1.89228	N.D.	0.801979	1.52465	0.712531	0.474554	N.D.	0.950522	1.48566	N.D.	2.58698	1.36724	N.D.	0.253473	0.270408	N.D.	0.325776	0.620256	0.489458	2.63232	0.856411	N.D.	1.47274	1.65893	1.11707	N.D.	0.741397	1.42136	N.D.	1.66895	1.06424	0.986576
d18:1/24:3-SM	809.653	19.318	1.11918	0.677651	N.D.	0.497583	N.D.	0.361656	0.274824	0.301297	0.465456	1.11953	N.D.	1.3786	1.56639	0.970969	0.326653	N.D.	0.723195	2.0263	N.D.	2.10981	1.06485	N.D.	0.231511	0.433026	N.D.	0.431053	0.542718	0.59046	3.59276	0.852251	N.D.	0.931734	1.6385	0.990952	N.D.	0.872527	1.23221	N.D.	1.18942	1.35797	0.925781
d18:1/24:2-SM	811.669	20.518	1.09498	0.446905	0.95252	0.763169	1.47681	1.12361	0.485125	0.508204	1.33241	1.27452	0.91274	1.15138	1.43199	0.716595	0.320274	1.00605	0.755315	1.07412	0.952856	1.32545	0.554395	0.582492	0.561304	0.918224	1.05953	0.645135	1.42437	1.71848	1.67837	0.594026	0.940405	0.637252	1.56735	1.05406	1.12375	0.91775	1.31135	0.99284	0.899485	1.65249	0.603812
d18:1/24:1-SM	813.684	22.002	1.11612	0.693309	0.947483	1.46038	1.41132	2.14315	1.18513	1.04737	3.31221	0.593795	0.910079	0.49638	0.539612	0.502527	0.147624	0.951327	0.251523	0.471577	0.826734	0.336229	0.397683	0.875122	1.01681	2.29308	0.976759	1.41758	2.91842	3.95663	0.660271	0.362027	1.1369	0.310023	0.648196	0.46712	1.095	0.435894	0.501454	0.869273	0.305501	0.480863	0.34094
d18:1/24:0-SM	815.7	22.971	1.1221	0.3881	0.912527	0.633081	1.35864	0.501975	0.674772	0.355302	1.49276	1.40208	0.894409	1.27822	1.31912	1.47613	0.331993	0.905142	0.413466	0.744473	1.21045	0.595951	1.37992	0.457686	0.605284	0.475877	1.05906	1.04552	1.37304	1.65413	2.10519	1.28327	1.02029	0.588684	1.46461	0.98752	1.27877	1.03001	0.718312	0.903026	0.870671	1.32804	0.870574
d18:1/14:0-GM3	1125.69	13.66	1.03326	0.812467	0.748988	1.5479	1.12854	0.803077	1.0953	0.626788	0.573929	2.56001	0.951417	0.773651	0.66917	0.766978	1.08004	1.33097	0.701962	0.85831	0.789474	0.561432	1.11344	0.976721	0.822969	1.91728	0.779352	0.78536	0.746705	1.02707	0.562591	1.71672	1.30567	1.51005	0.6818	1.05814	1.29555	0.693723	0.453081	0.69332	1.18637	1.1126	0.993545
d18:1/14:0+O-GM3	1141.68	13.341	0.6562	0.112418	ND	ND	ND	2.48942	0.471445	0.597509	0.470921	2.84628	ND	1.41612	1.76452	1.71841	1.64115	ND	0.35706	0.698716	ND	0.283966	1.0647	ND	0.644697	0.539002	ND	1.18553	0.696035	ND	0.971831	0.967706	ND	0.645663	1.20363	0.587659	ND	1.51531	0.735386	ND	0.669964	0.451108	0.366255
d18:1/16:0-GM3	1153.72	14.972	0.976901	0.807869	1.03586	1.08735	0.987667	0.967459	1.32504	0.786704	0.729363	1.78949	1.08902	0.889883	0.61055	1.44506	1.22855	0.826068	0.946086	0.919426	1.05606	0.845769	0.662355	0.679354	0.878786	1.12377	0.913247	0.823243	0.708004	0.930925	1.34024	1.53059	1.34737	1.54986	0.837498	0.871166	1.48203	0.780975	0.897489	0.583316	1.14744	0.573342	0.773582
d18:1/16:0+O-GM3	1169.72	14.547	0.922455	0.6704	0.882273	0.822854	1.18268	1.80443	0.721829	0.690421	0.732007	2.15495	1.49662	1.17401	1.45229	1.86736	1.03207	0.673884	0.111949	0.771879	0.947226	0.278842	0.989278	0.692828	1.00729	0.736554	0.35724	1.32716	0.828299	0.516808	0.114911	1.18161	0.424899	0.820803	1.94204	0.673813	2.52233	2.23021	1.38561	0.820027	0.224091	0.862685	0.543941
d18:1/18:0-GM3	1181.75	16.457	1.0612	0.681379	ND	1.27615	ND	1.16253	1.57671	0.794612	1.07621	1.26328	ND	0.711322	0.87374	0.958868	1.25255	ND	0.542511	0.967021	ND	0.783757	0.331168	ND	0.851837	1.13917	ND	0.969959	0.867876	1.17511	0.721491	1.94146	ND	2.12524	0.924438	0.708772	ND	0.835627	0.654068	ND	0.992743	0.743565	0.778209
d18:1/20:0-GM3	1209.78	18.356	1.39822	0.265011	0.383715	0.310673	0.711277	0.602457	2.38637	0.291282	0.761843	ND	0.664483	ND	ND	ND	ND	0.94525	ND	ND	1.28217	ND	ND	0.786149	1.22451	1.30126	1.13711	0.406541	0.562007	2.15305	ND	ND	2.2087	ND	ND	ND	1.54422	ND	ND	0.336921	ND	ND	ND
d18:1/22:0-GM3	1237.81	19.562	1.06654	0.666838	0.986072	1.42491	0.679666	0.843803	1.50625	0.530626	1.05743	2.06287	0.887187	0.891199	0.443155	0.642707	0.914855	0.657382	0.714447	1.10342	1.2883	0.704707	1.03406	0.582173	1.04892	0.862264	1.28412	0.732908	0.706873	1.13207	0.267501	2.55455	1.94011	1.29375	0.548693	1.27426	1.16852	0.719164	0.586446	0.526462	0.916273	1.10884	1.37307
d18:1/24:0-GM3	1265.85	20.8	1.04844	0.741018	0.752955	1.68016	1.01182	0.549064	1.53655	0.0713021	0.835773	1.57841	0.900709	1.04998	0.572403	0.783197	1.23797	0.867612	0.977593	1.09406	1.30378	0.783265	0.952883	0.543735	1.14623	0.760417	1.25177	0.632351	0.431216	1.16496	1.17584	2.21688	1.75768	1.72953	0.412606	0.91252	1.00709	0.579887	0.421004	0.602837	1.27089	1.12453	1.31852
d18:1/24:1-GM3	1263.83	19.726	1.23529	0.337091	0.805826	1.16752	0.7748	0.948508	1.42073	0.48432	0.938561	ND	1.01267	ND	ND	ND	ND	0.818754	ND	ND	0.575713	ND	ND	1.25743	1.05937	1.77661	0.802379	0.603703	0.569143	1.03153	ND	ND	2.48643	ND	ND	ND	0.868741	ND	ND	0.597259	ND	ND	ND
d18:1/24:2-GM3	1261.81	18.453	1.09781	0.575563	ND	1.72591	ND	1.06252	1.01591	0.420668	0.777645	1.45525	ND	0.71916	0.724482	0.539614	1.02166	ND	0.927952	1.35423	ND	0.942822	0.638028	ND	0.932826	1.63285	ND	0.594077	0.535225	1.03123	0.449723	1.28209	ND	2.4544	0.79903	1.45363	ND	0.654974	0.853925	ND	1.01118	0.876252	1.11275
d18:2/16:0-GM3	1151.7	13.897	0.917594	0.522308	0.936495	1.77828	1.30225	1.25596	1.21275	0.895032	0.713384	2.21686	1.06109	0.657896	0.676967	0.863614	1.01365	0.836013	0.516155	1.50894	1.07315	0.592693	0.72718	0.562701	0.989734	1.53311	0.876206	0.789303	0.676577	0.887972	0.28395	1.19786	1.2299	2.1028	0.829123	0.965776	1.44293	0.753892	0.985301	0.67926	0.609935	0.900625	0.86468
16:0-ChE	642.618	28.069	0.928258	0.803695	ND	0.0114777	0.0207067	0.00302968	ND	ND	0.0058313	0.00312633	0.017053	0.0025462	0.00322119	0.00258692	0.00215829	0.0166162	0.00339526	0.00407643	0.0156259	0.00478003	0.00229687	0.014961	0.00535778	0.00236243	0.0192783	0.00724817	0.00447906	0.00133775	0.00249555	0.00153595	0.0171401	0.00311524	0.00376385	0.00545274	0.0151092	0.00306877	0.00569599	0.0174511	0.00244584	0.00294616	0.00228573
16:1-ChE	640.603	27.299	0.945791	0.863724	0.124302	0.103738	0.278423	0.0635252	0.0252793	0.0115889	0.152698	0.0265618	0.21337	0.0246993	0.0230109	0.0312383	0.016498	0.126906	0.0137522	0.00509858	0.190427	0.0129622	0.0211969	0.135404	0.0154166	0.0674957	0.181205	0.0973666	0.145855	0.0639357	0.0536546	0.0252754	0.25253	0.0158878	0.0212761	0.0122446	0.147503	0.0312471	0.0130328	0.101695	0.0211078	0.0391729	0.0174791
18:1-ChE	668.634	28.008	0.81039	0.490153	1.45472	0.684553	0.609891	0.334961	0.0713238	0.065441	0.870473	0.131467	0.49297	0.113588	0.117163	0.142751	0.101215	0.472392	0.142133	0.104948	0.516107	0.0985301	0.0831924	0.41372	0.400755	0.254587	0.505907	0.732813	0.41676	0.24863	0.108794	0.0743975	0.557982	0.113634	0.118547	0.130839	0.50299	0.115337	0.190473	0.406708	0.112765	0.138817	0.0922909
18:2-ChE	666.618	27.342	0.889434	0.617722	4.70434	3.82425	2.83697	1.92439	0.828594	0.908244	2.4528	0.594995	1.92722	0.575994	0.595531	0.661769	0.461839	2.40518	0.716701	0.919166	2.3352	0.605059	0.679677	1.6352	2.55472	1.18983	2.71056	3.05717	2.07804	2.18749	0.544854	0.42309	1.87726	0.50535	0.624044	1.06538	2.33796	0.419991	0.920091	2.07279	0.59375	0.637637	0.612773
18:3-ChE	664.603	26.785	0.710181	0.425619	0.824996	0.0990942	0.285608	0.0488854	0.0186639	ND	0.171902	0.0240746	0.30513	0.0321985	0.01841	0.0600518	0.0255195	0.326342	0.0243902	0.0210879	0.394404	0.0110966	0.0650539	0.271379	0.0657533	0.0751971	0.211603	0.18227	0.13304	0.1117	0.0437335	0.0741167	0.390788	0.0160497	0.0189358	0.0591096	0.263179	0.0292207	0.0200439	0.137446	0.0208571	0.032614	0.0184117
20:2-ChE	694.65	27.998	0.873351	0.709804	ND	0.0331463	ND	0.00780626	0.00564834	ND	0.0373634	0.00616198	ND	0.00596561	0.00528065	0.00735255	0.00497123	ND	0.00617543	0.00720304	ND	0.00449854	0.00658341	ND	0.020331	0.0114671	ND	0.029633	0.0132804	0.00843775	0.00444318	0.00394433	ND	0.00504253	0.00544029	0.00648214	ND	0.00479392	0.00948862	ND	0.00535931	0.00604116	0.00503755
20:3-ChE	692.634	27.411	0.884617	0.590837	0.438926	0.436932	0.375634	0.180153	0.0690258	0.0146095	0.42778	0.0961688	0.430464	0.0960676	0.0980602	0.145431	0.0871361	0.412528	0.117483	0.1036	0.465352	0.0517771	0.160078	0.194259	0.236607	0.189833	0.403607	0.44129	0.227348	0.255565	0.0661782	0.0821504	0.351036	0.0700148	0.107051	0.116104	0.351439	0.106618	0.0938483	0.347774	0.0890765	0.100307	0.0875399
20:4-ChE	690.618	26.974	0.861377	0.520695	4.07645	2.90149	2.81161	2.56728	0.870687	0.196464	2.54754	0.565361	2.24894	0.584756	0.589329	0.669284	0.659006	2.69376	0.522527	0.759131	2.72229	0.637869	0.620739	1.52152	1.98666	1.53903	2.00796	2.38608	1.93027	1.77893	0.484131	0.453491	2.61011	0.539144	0.64945	0.621017	2.55496	0.437457	0.672434	2.53856	0.682202	0.454136	0.668841
20:5-ChE	688.603	26.41	0.888831	0.737682	0.750428	0.189117	0.235191	0.110244	0.0765947	0.0381855	0.188912	0.0463588	0.409165	0.033947	0.0551367	0.0600567	0.0377848	0.2976	0.0351362	0.0310898	0.295572	0.0238117	0.0491237	0.455859	ND	0.164568	0.171602	0.329599	0.136689	0.13012	0.0160597	0.0739982	0.25077	0.0317384	0.0567437	0.0386464	0.249268	0.0307967	0.0224301	0.323671	0.0526729	0.0531592	0.0456197
22:4-ChE	718.65	27.5	0.879752	0.625201	0.00917095	0.0260792	0.0189168	0.0146479	0.00237186	ND	0.0315381	0.00467069	0.0290444	0.00515086	0.00370775	0.00772422	0.00616604	0.0376247	0.00449482	0.00983051	0.0312972	0.00328115	0.00814358	0.0141359	0.0222489	0.0144547	0.02236	0.0284439	0.0131307	0.0136748	0.00409565	0.0044293	0.0297185	0.00430496	0.00394148	0.00505745	0.0155188	0.00425478	0.00654474	0.0268443	0.00570166	0.00318074	0.00610811
22:5-ChE	716.634	27.152	0.757603	0.461828	0.285866	0.0808662	0.0802589	0.0498368	0.0331569	ND	0.055063	0.0107888	0.182287	0.0222123	0.0156166	0.0254126	0.0192488	0.056031	0.0223426	0.0162423	0.163173	0.00727614	0.0194991	0.0747208	0.0344695	0.0837109	0.0305674	0.0796039	0.0391175	0.0700052	0.0153446	0.0197857	0.189449	0.0271468	0.0137546	0.013537	0.151389	0.0170627	0.0199339	0.0487551	0.0132251	0.00667432	0.0157369
22:6-ChE	714.618	26.612	0.897282	0.71082	2.21583	0.764645	0.534943	0.491579	0.393391	0.0812665	0.343313	0.224637	1.18102	0.158294	0.191601	0.194052	0.202358	0.541511	0.217422	0.403511	1.07417	0.223654	0.240893	0.620599	0.932277	0.594706	0.243305	0.814307	0.177569	0.6665	0.104882	0.247029	1.33971	0.292044	0.224675	0.280137	0.988366	0.120725	0.322335	0.448864	0.262136	0.20065	0.260207
14:0/18:2-DG	582.509	19.073	1.43668	0.348058	ND	0.725525	ND	1.01551	0.0846101	0.242047	1.24162	2.07022	ND	1.06494	1.13675	0.883262	0.174954	ND	0.852281	0.453657	ND	1.12263	0.352448	ND	0.192268	0.787413	ND	0.38592	5.06485	0.424167	3.08075	0.421002	ND	0.433776	1.12776	0.955314	ND	0.798589	0.57689	ND	0.610701	2.19208	0.528047
14:0/18:3-DG	580.494	17.997	1.21069	0.523992	ND	1.05553	1.11024	0.869268	0.134027	0.376841	0.91456	4.2603	0.934775	0.6022	0.768977	0.786354	0.152527	0.941156	0.76605	0.297411	0.829493	0.951502	0.451999	0.488125	0.475843	0.702539	1.28252	0.491827	1.7136	0.579603	2.58985	0.598067	0.682737	0.386407	0.957613	1.56207	0.778447	0.742403	0.666807	1.9525	0.525101	4.11167	0.509046
14:0/20:4-DG	606.509	18.886	1.01733	0.963847	ND	1.16455	ND	2.62746	0.105281	0.277183	1.62019	2.03521	ND	0.820958	0.192831	0.159139	0.120003	ND	0.540642	0.572074	ND	3.2321	0.408016	ND	0.543676	1.02675	ND	1.23946	3.86566	1.01165	2.53805	0.238261	ND	0.111857	0.559709	1.48293	ND	0.485708	0.228912	ND	0.533037	0.943616	0.315077
14:0/22:6-DG	630.509	18.491	1.00115	0.998064	ND	0.750666	ND	0.787411	ND	0.175202	0.666805	5.35963	ND	1.03901	0.81711	0.865416	0.208228	ND	0.721256	0.257167	ND	1.09444	0.249681	ND	0.278915	0.237297	ND	0.35831	0.6636	0.250676	3.56997	0.540003	ND	0.347701	1.00969	0.769909	ND	0.854689	0.889342	ND	0.920155	3.61305	0.704675
16:0/14:0-DG	558.509	20.075	1.38952	0.326457	0.598717	0.232201	1.81458	0.820841	0.0549019	0.295813	0.795237	2.549	0.591207	0.9503	1.00961	1.06658	0.245019	0.651283	1.64136	0.112406	1.53741	0.521776	0.348352	0.674495	0.130769	0.239514	0.631486	0.441816	3.99926	0.266924	4.94746	0.318405	1.9163	0.305827	1.00311	1.4708	1.04861	0.916086	0.279102	0.535909	0.782314	2.48551	0.769701
16:0/14:1-DG	556.494	18.803	1.65521	0.395681	ND	0.920579	ND	2.18918	0.0960904	0.41004	1.41093	1.50518	ND	0.676807	0.429669	0.751971	0.15921	ND	0.880509	0.13657	ND	0.728001	0.161575	ND	0.177345	0.991053	ND	0.58129	7.94621	0.415196	3.90461	0.312371	ND	0.275187	0.407996	0.663515	ND	0.412292	0.220247	ND	0.379536	1.51642	0.340431
16:0/16:0-DG	586.541	21.411	1.25289	0.396575	0.840278	0.363436	1.81608	0.738718	0.16952	0.348893	0.717405	2.21515	0.668455	1.07152	1.52452	1.33485	0.330545	0.42561	1.33208	0.331782	1.46023	0.781299	0.348441	0.553977	0.201876	0.129779	0.749263	0.453962	3.38625	0.336625	3.31656	0.578895	2.02778	0.292183	1.12131	1.35403	0.991688	1.63941	0.418918	0.466646	0.700836	2.65259	0.808621
16:0/18:1-DG	612.556	21.501	1.25807	0.288846	0.857678	0.730169	1.79325	0.7694	0.265073	0.238864	1.15603	1.75905	0.739002	0.811261	1.41537	1.09376	0.312004	0.510751	0.917888	0.675367	1.30791	1.04771	0.378848	0.412606	0.292329	0.594912	0.972621	0.520304	3.07775	0.669738	1.69971	0.558328	1.48199	0.526666	1.53658	0.912835	1.13288	1.67556	0.90298	0.791311	0.557322	3.23417	0.670016
16:0/18:2-DG	610.541	20.609	1.12288	0.500428	0.840068	1.13514	1.45166	0.741587	0.23686	0.306419	1.17029	2.22563	0.656251	0.592808	1.34957	0.720295	0.160732	0.791213	1.15533	1.28334	1.21443	1.3073	0.534795	0.33634	0.777501	0.56101	1.26072	0.647035	2.15927	0.702106	1.88984	0.448617	1.02926	0.556638	1.40042	1.53234	1.09135	0.946217	1.08413	1.32871	0.46735	2.20224	0.705184
16:0/18:3-DG	608.525	19.671	1.20113	0.353197	0.561174	1.65249	1.16892	0.811356	0.236362	0.376631	1.35337	ND	0.683255	ND	ND	ND	ND	0.949704	ND	ND	1.29299	ND	ND	0.532899	0.985313	0.828	1.40709	0.827305	1.96063	0.968554	ND	ND	1.04218	ND	ND	ND	0.992948	ND	ND	1.36884	ND	ND	ND
16:0/20:4-DG	634.541	20.376	1.09802	0.705581	1.05086	0.857488	1.35228	1.12318	0.171888	0.205831	1.49661	3.47124	0.718152	1.0647	1.03133	0.750247	0.298242	0.614814	0.804239	0.562185	1.01038	1.21498	0.291985	0.562378	0.337035	0.561228	0.7781	0.614847	2.31106	0.639444	3.65032	0.457218	2.19278	0.523295	1.29156	1.05324	0.761694	0.806445	0.909263	0.958558	0.616254	1.32744	0.557216
16:0/20:5-DG	632.525	19.483	1.22464	0.477944	0.808081	0.913115	1.09406	0.948952	0.153912	0.344033	1.39922	4.43516	0.703135	0.908716	0.957147	0.855236	0.175636	0.571953	0.5852	0.272173	0.802834	0.789803	0.318932	1.13341	0.724167	0.797561	0.65591	0.755464	2.26291	0.553452	3.79572	0.607965	1.62666	0.314119	0.981928	0.892971	1.59255	0.919369	0.369701	1.01141	0.470002	2.02054	0.476904
16:0/22:1-DG	668.619	23.455	2.44727	0.32984	ND	0.312186	ND	0.343152	0.245019	0.25216	0.452872	1.53836	ND	0.702968	1.19195	0.598056	0.279932	ND	0.703208	0.311296	ND	0.887454	0.187848	ND	0.149961	0.238108	ND	0.243343	0.781637	0.509036	1.24174	0.327071	ND	0.287495	1.02667	0.675791	ND	1.06362	0.687435	ND	0.567107	12.7304	0.46412
16:0/22:5-DG	660.556	20.865	1.12817	0.611736	0.852475	0.775369	1.48078	0.784645	0.190399	0.129074	1.23657	3.44893	0.850896	1.01369	1.38643	1.01549	0.267854	0.705659	0.760027	0.38531	1.18084	0.951674	0.412088	0.427027	0.281288	0.73655	0.643303	0.372921	1.51942	0.554819	3.24455	0.682215	2.00016	0.567025	1.56354	0.574452	0.965348	1.8112	0.991994	0.89352	0.585998	2.00626	0.750224
16:0/22:6-DG	658.541	20.033	1.05877	0.854197	0.867425	0.751508	1.18259	0.839151	0.147785	0.254589	0.647062	5.50516	0.740112	0.779889	1.15558	0.725169	0.237416	0.602048	0.578866	0.506938	1.24427	1.38942	0.2891	0.597522	0.325841	0.564051	0.939852	0.362143	1.04098	0.446746	3.01401	0.660204	1.2703	0.408735	1.32515	0.702508	1.53172	1.10937	1.19369	1.02416	0.667914	2.61757	0.753454
16:0/24:1-DG	696.65	24.26	1.69483	0.141394	1.07177	0.784067	1.46175	1.25762	0.381554	0.464865	2.12526	0.899936	0.5797	0.561537	0.92826	0.503767	0.230333	0.458461	0.623134	0.0557186	1.16784	0.342854	0.110017	1.9149	0.888594	0.658187	0.767553	0.70418	2.78395	3.85392	1.17034	0.183702	1.22765	0.133386	0.752907	0.853372	0.720952	0.656152	0.478681	0.629426	0.406014	5.86784	0.339855
16:1/16:1-DG	582.509	19.073	1.30148	0.360145	0.61511	0.725525	1.41186	1.01551	0.0846101	0.242047	1.24162	2.07022	0.669294	1.06494	1.13675	0.883262	0.174954	1.09137	0.852281	0.453657	1.24777	1.12263	0.352448	0.455021	0.192268	0.787413	1.00332	0.38592	5.06485	0.424167	3.08075	0.421002	1.34536	0.433776	1.12776	0.955314	1.06028	0.798589	0.57689	1.10061	0.610701	2.19208	0.528047
16:1/18:1-DG	610.541	20.45	1.12989	0.583247	ND	1.15522	ND	0.754707	0.24105	0.31184	1.191	2.26565	ND	0.638111	1.2119	0.65927	0.176391	ND	1.20964	1.31357	ND	1.49141	0.498892	ND	0.791257	0.570935	ND	0.658483	2.19747	0.714527	1.94642	0.498595	ND	0.523645	1.37765	1.4171	ND	0.830676	1.13518	ND	0.497738	2.08274	0.638935
16:1/18:2-DG	608.525	19.414	1.138	0.57538	0.76946	1.93283	1.16091	1.27965	0.218969	0.422616	1.44782	2.2903	0.592811	0.709184	1.1408	0.681255	0.13906	0.980444	0.544926	0.724921	1.15676	1.17494	0.376633	0.300386	0.515626	0.950871	1.23588	0.474955	3.13097	0.700466	3.13275	0.470351	0.970326	0.343215	1.10468	0.550871	1.18247	0.948821	0.592185	1.65055	0.451867	2.09398	0.454479
16:1/18:3-DG	606.509	18.413	1.1188	0.691199	0.428207	1.25535	0.858114	0.782328	0.107289	0.246052	1.00559	4.37908	0.725573	0.48746	0.798339	0.583516	0.213973	1.13679	0.816725	0.825023	1.22855	1.48223	0.548776	0.373832	0.481715	0.640319	1.59558	0.385028	1.80283	0.657458	3.31051	0.432604	0.71028	0.417822	0.926606	1.08813	1.17417	0.711652	0.764888	1.7689	0.521661	2.8771	0.44994
16:1/20:4-DG	632.525	19.033	1.29683	0.362613	0.544088	0.665922	0.749683	1.6179	0.131165	0.136038	1.64556	3.48765	0.528186	0.949672	0.779818	0.66529	0.194878	0.772401	0.690438	0.398552	0.946191	1.30572	0.280732	0.293877	0.24682	0.869446	1.67316	0.547986	3.61223	0.624594	3.54145	0.453768	1.95145	0.636033	0.903158	1.20823	0.692889	0.592369	0.695639	1.84808	0.596366	1.06773	0.454851
16:1/22:4-DG	660.556	20.147	1.00684	0.982301	ND	1.28993	ND	0.624058	0.112973	0.248254	0.862611	3.97734	ND	0.906364	1.28769	0.58158	0.154969	ND	0.955109	0.869897	ND	1.38651	0.693362	ND	0.565482	0.524755	ND	0.346412	1.48205	0.672666	2.25323	0.385911	ND	0.499045	1.47035	1.51303	ND	0.913316	1.1031	ND	0.539952	2.25077	0.529277
16:1/22:5-DG	658.541	19.2	1.11996	0.705504	ND	2.16104	ND	2.41306	0.424971	0.732096	1.6559	2.29365	ND	0.475983	0.746551	0.52666	0.140032	ND	0.322704	0.341823	ND	0.705487	0.242137	ND	0.936987	1.62198	ND	1.04138	2.99345	1.28466	2.17087	0.491622	ND	0.298501	0.959282	0.381347	ND	0.875505	0.42314	ND	0.418259	1.5813	0.339618
16:1/22:6-DG	656.525	18.751	1.06222	0.860864	ND	1.23657	ND	1.77897	0.181361	0.477198	1.38137	3.77678	ND	0.668997	1.0234	0.630466	0.15738	ND	0.316471	0.372108	ND	1.38355	0.178867	ND	0.358789	1.26033	ND	0.374251	2.04202	0.663314	3.43472	0.734382	ND	0.281368	1.01416	0.362737	ND	0.973364	0.683032	ND	0.726116	2.00974	0.518187
16:2e/16:0-DG	551.503	21.451	1.39909	0.347612	ND	0.292614	ND	0.601741	0.12484	0.250896	0.643141	2.42354	ND	1.18519	1.51622	1.29864	0.343862	ND	1.37459	0.349484	ND	0.824944	0.374803	ND	0.164212	0.142093	ND	0.331516	2.83043	0.18726	3.84486	0.615463	ND	0.317254	1.11562	1.34398	ND	1.70157	0.414521	ND	0.754233	2.81765	0.814824
16:2e/18:2-DG	575.503	15.931	1.53426	0.248812	ND	1.23831	ND	1.30938	0.268057	0.900003	1.18278	1.58331	ND	0.875549	0.222961	0.4116	0.141305	ND	0.532847	0.382674	ND	1.13549	0.784595	ND	0.598757	0.885684	ND	0.717326	3.19864	1.38337	4.98089	0.603517	ND	0.276365	0.620366	0.97531	ND	0.326176	0.724387	ND	0.825075	1.59808	0.317193
18:0/16:0-DG	614.572	22.542	1.10003	0.693229	1.04763	0.621005	1.65075	1.04287	0.420531	0.549762	2.56948	1.89316	0.680801	0.657556	0.908686	1.11634	0.275608	0.38032	1.19701	0.276459	1.6254	0.875207	0.284357	0.548632	0.570475	0.323674	0.852349	0.808913	3.20618	0.810191	2.11883	0.503174	1.73976	0.249454	0.748547	1.24835	0.896046	1.06203	0.349337	0.578303	0.503997	3.13219	0.676639
18:0/18:0-DG	642.603	23.478	1.26041	0.321242	0.761297	0.873607	1.33595	1.44712	0.704799	0.730213	2.43136	1.28734	0.623772	0.597532	0.617196	0.684337	0.274091	0.564833	0.710994	0.271605	1.77308	0.825455	0.246983	0.496071	0.798869	0.761293	0.810413	0.861471	3.28798	2.0977	1.38636	1.59517	1.03143	0.216018	0.601246	0.786612	2.10216	0.791183	0.388817	0.500982	0.434254	2.81172	0.478676
18:0/18:1-DG	640.587	22.628	1.30306	0.3616	ND	0.732974	ND	1.00274	0.348306	0.394765	1.53068	1.96002	ND	0.72939	1.30481	0.874471	0.325732	ND	1.05733	0.419546	ND	1.10231	0.319737	ND	0.471157	0.708445	ND	0.452673	2.58631	0.710662	1.25927	0.505411	ND	0.482589	1.27654	1.06203	ND	1.54361	0.841129	ND	0.425611	3.89595	0.675825
18:0/22:5-DG	688.587	21.862	1.26947	0.742917	ND	2.48799	ND	2.7052	0.373232	0.351267	3.9947	0.270443	ND	0.0702515	0.0286924	ND	0.0149712	ND	0.0970218	ND	ND	0.0792318	0.00642626	ND	1.04613	1.88183	ND	1.26549	8.35394	1.96651	0.300769	0.163796	ND	0.0185446	0.112484	ND	ND	0.108916	0.0703527	ND	0.166355	0.0450982	0.0203577
18:0/22:6-DG	686.572	21.322	0.954691	0.918159	ND	0.404467	ND	0.993313	0.0368643	0.190888	ND	5.41286	ND	0.880963	1.11363	0.751256	0.253815	ND	0.601676	0.480095	ND	1.88342	0.320143	ND	0.220786	0.296099	ND	0.27833	0.587216	0.449852	2.62059	0.636447	ND	0.592829	1.2018	0.766193	ND	1.1208	1.47114	ND	0.596755	3.06655	0.771229
18:1/14:0-DG	584.525	20.284	1.40189	0.303936	1.01537	0.690721	1.42541	1.05556	0.126327	0.334577	1.2176	1.79204	0.65076	0.805015	1.07354	1.11113	0.249957	0.552772	0.900719	0.197339	1.53613	0.74243	0.275882	0.465314	0.155192	0.685398	0.634287	0.443635	5.67669	0.470569	3.38259	0.331535	2.02912	0.374784	1.28038	0.57739	1.01376	1.20013	0.428276	0.677082	0.619191	2.33992	0.461483
18:1/18:1-DG	638.572	21.657	1.24161	0.344433	0.958168	1.31313	1.67786	1.08581	0.638422	0.344895	1.51323	1.09892	0.802695	0.737086	1.05711	0.829935	0.201731	0.609928	0.630322	0.713597	1.07783	1.29458	0.320103	0.354278	0.391395	1.07944	1.1563	0.500338	3.40222	1.2281	0.942571	0.420303	1.07277	0.362306	1.32282	0.473029	1.17402	1.64064	0.920034	1.11615	0.406028	3.62567	0.506213
18:1/18:2-DG	636.556	20.761	1.11285	0.698075	ND	1.03986	ND	0.591136	0.294668	0.212384	0.838209	2.40395	ND	0.68394	1.56786	0.648912	0.204652	ND	0.949225	1.66676	ND	1.56423	0.562104	ND	0.584146	0.455998	ND	0.371977	1.06606	0.578038	1.28315	0.612501	ND	0.537741	1.61448	1.35493	ND	1.08317	1.58502	ND	0.438214	3.56359	0.643104
18:1/18:3-DG	634.541	19.716	1.08433	0.727475	0.582235	1.73992	0.944241	0.56236	0.199485	0.264502	0.77897	1.9997	0.540778	0.448456	0.976416	0.39751	0.112094	1.18312	1.04818	2.97524	0.79881	1.7887	0.871657	0.293933	0.937361	0.492801	1.97162	0.41259	1.06278	0.597028	1.66042	0.368028	0.433149	0.782873	1.08969	2.44658	0.932103	0.491976	1.42948	2.32002	0.335025	2.17386	0.556311
18:1/20:2-DG	664.587	21.871	1.15507	0.544281	0.966813	1.82316	1.51936	0.714972	0.257613	0.300614	1.19877	ND	0.528841	ND	ND	ND	ND	0.895699	ND	ND	1.07461	ND	ND	0.465628	0.745048	1.05573	1.52162	0.336842	1.95436	1.61289	ND	ND	0.706626	ND	ND	ND	0.891184	ND	ND	1.42962	ND	ND	ND
18:1/20:3-DG	662.572	21.312	1.11447	0.720513	ND	1.43538	ND	0.5483	0.135838	0.22127	0.997105	3.69776	ND	0.995795	1.30326	0.91974	0.363318	ND	0.797114	0.473943	ND	0.979526	0.349061	ND	0.457229	0.662822	ND	0.258823	0.957921	0.751271	2.87394	0.792009	ND	0.498992	1.69159	0.891389	ND	1.89663	1.06973	ND	0.622322	1.74384	0.614087
18:1/20:4-DG	660.556	20.519	0.991146	0.962155	1.13793	1.41984	1.41488	1.74275	0.424817	0.280489	2.20722	2.3451	0.689906	0.93938	1.11084	0.544396	0.207486	0.687366	0.495283	0.833757	0.867592	1.45284	0.284792	0.483087	0.626035	1.09245	1.01089	0.748854	2.51518	1.12592	1.84034	0.558076	1.4911	0.41083	1.06954	0.616608	0.874875	0.784536	1.12639	1.34238	0.463555	1.2716	0.461086
18:1/20:5-DG	641.514	20.732	0.893305	0.763736	ND	0.252902	ND	0.497168	0.247854	0.193645	0.62711	0.884666	ND	1.30061	1.9977	0.700376	0.325566	ND	0.900245	1.0935	ND	5.1861	0.610308	ND	0.131455	0.437628	ND	0.282891	1.20571	0.709236	1.57248	0.577432	ND	0.517281	1.67117	1.02888	ND	1.25801	1.93007	ND	0.683072	1.24123	0.935723
18:1/22:1-DG	694.634	23.526	1.02533	0.938897	1.58966	ND	2.39824	ND	ND	ND	ND	0.977855	0.962596	ND	ND	ND	ND	0.374037	0.585858	0.501726	0.649065	0.994166	0.825669	1.51265	ND	ND	0.770077	ND	ND	ND	3.55361	0.617953	0.731573	0.252401	ND	0.825182	0.544554	0.770907	0.242204	0.467547	0.600901	2.25157	ND
18:1/22:3-DG	690.603	22.223	1.39898	0.22731	ND	1.15509	ND	0.638665	0.149399	0.112502	0.934003	2.34542	ND	0.92631	1.69454	0.944186	0.272754	ND	0.631495	0.300165	ND	1.20289	0.297642	ND	0.471584	0.921519	ND	0.346636	1.87234	1.24311	1.72955	0.545209	ND	0.488176	1.92049	0.652773	ND	1.58844	1.47089	ND	0.423725	3.17841	0.542097
18:1/22:4-DG	688.587	21.423	1.04283	0.859867	0.950435	0.764385	1.37325	0.745065	0.12682	0.153327	0.959884	3.96009	0.609344	0.906385	1.75693	0.896791	0.333054	0.739918	0.712908	0.652942	1.33772	1.2152	0.39719	0.548055	0.24575	0.464525	1.0588	0.295033	1.23029	0.388905	2.39769	0.726418	1.51004	0.538632	1.94499	0.856533	0.849174	1.53809	1.4482	1.02327	0.621942	2.03497	0.687078
18:1/22:5-DG	686.572	20.975	1.13702	0.609798	1.10592	0.867884	1.10148	0.643135	0.144554	0.191662	0.783017	4.01234	0.607813	1.00257	1.82732	0.907802	0.24536	0.788674	0.663754	0.42096	0.867986	1.20738	0.362985	0.461048	0.327843	0.536655	1.32829	0.340858	0.600365	0.509041	2.46127	0.90013	0.933215	0.634825	1.93227	0.486965	1.18153	2.05689	1.32797	1.62405	0.595963	2.37507	0.633152
18:1/24:0-DG	724.681	25.115	1.51396	0.23985	ND	0.980334	ND	1.91373	0.77454	0.638967	1.45005	ND	ND	0.949811	0.844546	0.731081	0.279644	ND	0.616903	0.374766	ND	0.372651	0.266373	ND	0.654508	1.18552	ND	1.17878	4.43441	2.5607	0.834757	0.316822	ND	0.31342	0.693621	0.812203	ND	0.688272	0.543856	ND	0.38027	2.85322	0.356246
18:2/14:1-DG	580.494	17.78	1.1326	0.741148	ND	1.29279	ND	1.39318	0.139069	0.325813	1.15096	3.40911	ND	0.956344	0.946741	0.834089	0.210473	ND	0.715877	0.242461	ND	1.11414	0.370377	ND	0.314639	0.879138	ND	0.452644	3.22435	0.437987	4.24924	0.509466	ND	0.470822	1.19224	0.50081	ND	0.765181	0.359632	ND	0.584392	1.56966	0.388381
18:2/20:4-DG	658.541	19.471	1.03809	0.858884	0.774029	1.35831	1.12532	1.10381	0.221253	0.262879	1.08348	3.32251	0.695616	0.871737	1.03715	0.482023	0.175881	1.0842	0.644826	1.44843	0.702586	1.69287	0.549022	0.530424	0.71691	0.507568	1.20583	0.647269	1.15938	0.786721	2.91599	0.471488	1.02704	0.702991	1.20554	1.49382	1.01694	0.491892	1.2757	1.83801	0.537539	1.28299	0.549996
18:2/22:6-DG	682.541	19.15	1.16094	0.428925	0.793812	1.59218	0.800597	1.07943	0.290038	0.460351	0.922321	2.32649	0.964109	0.784874	1.00227	0.450633	0.143424	0.913223	0.528544	1.24244	0.825022	2.00219	0.429485	0.487143	0.995584	0.693329	1.19547	0.571602	0.875509	1.29166	2.51823	0.650179	0.618767	0.693144	1.05949	0.846791	1.54285	0.599493	1.42287	1.85901	0.587578	2.37294	0.566932
18:2e/16:0-DG	579.535	22.535	1.07362	0.770517	1.37274	ND	1.44876	ND	ND	ND	ND	2.17435	0.809171	0.73792	0.976238	1.09262	0.301423	0.825983	1.25329	0.302431	0.914916	0.950369	0.32623	0.568442	ND	ND	1.142	ND	ND	ND	2.00732	0.569424	0.844257	0.25261	0.706156	1.26985	1.01628	1.12283	0.381858	1.05745	0.565905	3.33486	0.67433
18:2e/16:1-DG	577.519	16.943	1.38153	0.187201	1.06217	ND	1.39584	ND	ND	ND	ND	1.03523	0.731891	1.56962	0.85951	0.570678	0.443961	1.0214	0.617932	0.230346	0.876835	0.274756	1.00241	0.528819	ND	ND	1.39735	ND	ND	ND	0.229559	0.696504	0.566187	0.581538	1.58576	0.986999	1.03461	2.26928	1.11232	1.38489	0.624929	3.41525	0.893431
18:2e/18:1-DG	605.55	18.611	1.40258	0.0788954	1.75728	0.884865	0.78072	0.934338	0.737781	0.333351	0.822362	1.12102	0.864826	1.18548	1.00941	1.00408	0.347685	0.844187	0.619357	0.674582	0.553881	0.454626	0.886477	1.04734	0.388907	0.592408	1.56405	0.760898	2.73471	1.45808	ND	0.467248	1.34815	0.466565	0.80859	1.05139	0.617142	1.74556	1.84613	0.622435	0.883327	2.89671	0.884065
18:2e/18:2-DG	603.535	18.052	1.10657	0.856944	ND	3.49839	ND	3.03418	0.601547	2.34122	2.12282	0.0893503	ND	0.130567	0.0789399	ND	0.0230307	ND	0.130513	0.0653743	ND	0.100191	0.0817652	ND	1.69525	2.05684	ND	1.67399	4.73349	4.59975	0.14247	0.0184135	ND	0.0463743	0.0836644	0.118323	ND	0.132113	0.117387	ND	0.0469006	0.191031	0.0461051
18:3/18:2-DG	632.525	18.7	1.17766	0.552611	0.329206	2.66422	0.596497	0.759429	0.21901	0.419168	1.23445	3.3029	0.465116	0.899366	0.738509	0.630048	0.184555	1.89369	0.653864	0.37744	0.543642	1.23655	0.265861	0.315615	1.89279	0.715315	2.47055	0.769941	1.0835	1.34115	3.35385	0.429731	0.119299	0.602341	0.855316	1.14423	0.711265	0.56099	0.658789	2.55512	0.564775	1.01117	0.430756
18:3/20:4-DG	656.525	18.722	1.12884	0.792515	ND	0.748759	ND	0.289969	0.0776158	0.178839	0.22228	5.44561	ND	0.857252	1.31878	0.808735	0.191794	ND	0.435022	0.510107	ND	1.79408	0.246486	ND	1.01941	0.246926	ND	0.371422	0.156887	0.585106	3.86072	0.893481	ND	0.388495	1.37572	0.521808	ND	1.21953	0.874638	ND	0.82403	2.87902	0.657478
18:3e/18:1-DG	603.535	21.669	1.38672	0.276929	ND	1.32106	ND	1.14694	0.541563	0.322519	1.93237	1.33784	ND	0.722977	1.07281	0.690681	0.204406	ND	0.553568	0.562989	ND	0.965219	0.291446	ND	0.478977	1.15668	ND	0.514986	3.42214	1.22717	0.850062	0.521051	ND	0.352558	1.43768	0.54998	ND	1.65998	0.867378	ND	0.376051	3.38829	0.530619
18:1/20:1-DG	666.603	22.648	1.2126	0.449333	1.04879	ND	2.00154	ND	ND	ND	ND	1.41896	0.707837	0.754903	1.37077	0.863662	0.233736	0.722244	0.562056	0.699615	1.04879	0.8986	0.281489	0.644449	ND	ND	0.994045	ND	ND	ND	2.35348	0.495111	0.853823	0.330477	1.24557	0.690031	0.940261	1.4814	0.767124	1.03823	0.466137	3.50489	0.58198
20:3/22:5-DG	710.572	20.085	0.903718	0.825696	ND	0.802534	ND	0.396966	0.0343383	0.151647	0.381578	6.21548	ND	0.725132	1.44517	0.801257	0.171249	ND	0.665216	0.645123	ND	1.7388	0.559266	ND	0.49852	0.475696	ND	0.295271	0.775063	0.343987	2.35047	0.709575	ND	0.423043	1.38738	1.55342	ND	0.712373	1.19291	ND	0.490219	2.42827	0.630048
18:2/20:5-DG	639.498	19.709	1.242	0.47357	0.35591	0.328259	0.549415	0.45594	0.161417	0.210946	0.501059	0.490549	0.687632	0.748963	0.961746	0.47825	0.0715436	1.04009	1.33523	4.26127	0.56842	3.08962	0.60608	0.957157	0.420761	0.374612	1.21631	0.314592	0.895541	0.712301	1.85156	0.43929	0.357598	0.813028	0.918541	2.82321	2.37043	0.505278	2.21016	1.89704	0.415955	1.91412	0.690169
18:2/22:1-DG	692.619	22.848	1.47649	0.403662	0.758956	ND	2.22829	ND	ND	ND	ND	1.37499	0.825744	0.55216	0.608385	0.571217	0.15481	0.655738	0.695159	0.521606	0.892532	1.01722	0.374982	1.23254	ND	ND	1.26897	ND	ND	ND	2.84347	0.298149	0.643594	0.26773	0.705784	0.658543	0.607165	0.557657	0.377223	0.88646	0.287862	6.66579	0.467257
18:2/22:4-DG	686.572	20.645	0.982421	0.939165	0.925887	1.56557	1.46323	1.16015	0.26076	0.345737	1.41248	4.18154	0.852549	0.521134	1.26035	0.80118	0.207562	0.717862	0.43501	0.904644	1.0232	0.72099	0.413015	0.564135	0.591393	0.968068	0.782737	0.614871	1.08299	0.918254	1.87999	0.628221	1.68606	0.427178	1.242	0.592849	0.913899	1.55313	1.05403	1.07045	0.398091	2.28266	0.57616
20:4/22:4-DG	710.572	20.093	0.877139	0.791422	ND	0.577194	ND	0.300625	0.029918	0.0575423	0.296315	6.64892	ND	0.760956	1.51714	0.787765	0.17978	ND	0.735442	0.680099	ND	1.82983	0.548543	ND	0.289748	0.386077	ND	0.22456	0.706167	0.142181	2.2058	0.751798	ND	0.479147	1.45649	1.64719	ND	0.711332	1.25234	ND	0.578372	2.54923	0.669511
18:2/22:5-DG	684.556	20.181	1.09997	0.583127	1.19852	1.51497	1.14142	1.3211	0.502187	0.474005	0.915685	ND	0.841304	ND	ND	ND	ND	0.769081	ND	ND	0.845696	ND	ND	0.419188	0.646037	1.05607	1.13996	0.519067	1.62166	1.42922	ND	ND	0.883272	ND	ND	ND	1.36346	ND	ND	1.39811	ND	ND	ND
20:4/22:5-DG	708.556	19.774	0.914107	0.759955	ND	1.35794	ND	1.63538	0.412019	ND	1.76242	3.04471	ND	0.532493	0.897601	0.765658	0.189105	ND	0.259143	0.534914	ND	1.99614	0.239511	ND	0.274383	1.66982	ND	0.346691	0.96547	1.16042	2.31007	0.599063	ND	0.467399	0.715832	0.562031	ND	1.025	1.96673	ND	0.262684	1.52831	0.519051
18:2/24:0-DG	722.666	24.539	1.20919	0.483926	ND	0.487	ND	2.13248	0.633966	1.01758	1.70258	1.55389	ND	0.612304	0.860951	0.618513	0.185661	ND	0.98618	0.548483	ND	0.77714	0.516373	ND	0.839658	1.31255	ND	0.761764	1.51007	0.853203	2.06085	0.166756	ND	0.729204	0.758927	2.50695	ND	0.504805	0.459458	ND	0.386821	3.13187	0.384006
18:2/24:1-DG	720.65	23.701	1.44087	0.0918367	0.646357	1.42647	1.4978	1.44937	0.242528	0.18417	1.5301	1.30718	0.265255	0.731398	1.18037	0.636351	0.21361	0.962685	0.666466	0.309293	0.867819	1.00238	0.376881	1.689	1.1507	1.002	1.52359	0.628142	1.90625	2.83172	2.48536	0.324053	0.761105	0.275592	1.03226	0.809182	0.808594	0.609	1.00881	0.977787	0.51519	2.77068	0.394511
44:0-TG	768.708	26.049	1.14484	0.569114	1.45232	0.624183	0.981126	1.27617	0.146183	0.15373	1.58252	1.98058	0.840248	1.39185	0.750312	1.06403	0.259792	0.924635	1.83145	0.0852647	0.799912	0.82721	0.714823	2.00179	0.191841	0.263252	0.771014	1.06386	2.34325	0.567058	3.50173	0.368227	0.979922	0.351337	0.649211	2.01826	0.83784	0.572865	0.334247	0.411194	1.39011	2.02173	0.674924
44:1-TG	766.692	25.42	1.44302	0.334348	0.692091	0.239312	1.34607	1.79057	0.0689099	0.0665662	0.964821	1.20755	0.858657	1.14781	0.713603	1.45972	0.203474	0.681667	1.20121	0.033443	1.09402	0.753802	0.479847	1.53799	0.0666175	0.327543	1.02561	0.302899	2.70906	0.21551	6.72997	0.279185	1.35738	0.187953	0.677748	1.03849	0.840616	0.60492	0.2867	0.565887	1.16783	2.39036	0.477028
44:2-TG	764.676	24.832	1.33544	0.492704	0.594123	0.19667	1.0854	1.14229	0.0386769	0.0471192	0.729797	3.28756	1.02814	0.729815	1.00415	1.2737	0.130413	0.984715	1.60512	0.0433936	0.744058	1.06794	0.478268	1.65632	0.0388094	0.399352	1.47604	0.0897985	0.960714	0.119259	7.67457	0.298978	0.967185	0.169599	0.785163	1.84544	0.62839	0.698144	0.336415	0.835628	0.808659	2.55537	0.444829
44:3-TG	745.634	25.54	1.42485	0.398794	0.416672	0.551558	0.795754	2.08049	0.242996	0.24096	1.58398	ND	0.768613	ND	ND	ND	ND	0.708979	ND	ND	0.857937	ND	ND	1.90561	0.150455	0.408026	2.12758	0.562422	3.78188	0.397235	ND	ND	0.684769	ND	ND	ND	0.567413	ND	ND	1.16668	ND	ND	ND
44:0-TG	743.618	24.716	1.13355	0.727076	ND	0.125768	ND	1.06974	0.0367079	0.060567	0.401289	2.42322	ND	1.90056	1.47698	1.19741	0.273432	ND	1.90157	0.0605112	ND	1.58765	0.579969	ND	0.0296455	0.188226	ND	0.106173	1.07756	0.049135	3.98311	0.487263	ND	0.365086	1.60424	1.55555	ND	1.10155	0.722542	ND	1.45898	2.52974	0.645807
46:0-TG	796.739	26.684	1.25858	0.278569	ND	1.64693	0.608581	1.2081	0.282865	0.666401	2.15999	0.685491	0.456983	0.824467	0.75077	0.473353	0.181202	0.628722	1.8447	0.283145	0.517623	0.883121	0.550576	2.01297	0.483667	0.626579	0.483363	1.75648	2.7638	1.42637	1.15453	0.451582	0.551445	0.655032	0.750432	1.22392	0.45775	0.754287	1.23697	0.426773	1.20416	1.45215	0.618939
46:1-TG	794.723	26.061	1.22124	0.508969	0.952328	0.451221	1.68937	1.65013	0.0986376	0.095124	1.79448	1.4333	0.781326	1.36761	0.746335	1.32081	0.284038	0.759621	1.09445	0.0714222	1.16019	0.689401	0.624164	1.05761	0.128692	0.304167	0.785247	0.667128	3.46257	0.543553	5.06499	0.319188	1.35146	0.274749	0.692225	1.03199	1.01103	0.663034	0.267439	0.451821	1.2914	1.97261	0.595132
46:2-TG	792.708	25.45	1.29544	0.438087	0.701293	0.366477	1.58068	1.75979	0.0508702	0.0405171	1.41856	1.88995	0.908793	1.21189	0.765427	1.10246	0.220312	1.05781	0.992501	0.0745823	1.00512	0.752326	0.600729	0.896378	0.081851	0.459741	0.968742	0.253862	4.04646	0.289846	5.38636	0.267356	1.22117	0.229426	0.747588	1.11959	0.891143	0.656676	0.305897	0.768873	1.19288	2.19042	0.525645
46:3-TG	790.692	25.058	1.35775	0.348888	0.497387	0.660939	1.17416	2.11439	0.0712607	0.0555041	1.58607	2.13295	1.04721	0.562976	0.783234	0.874624	0.124806	1.06113	0.836924	0.0979844	0.806038	0.8765	0.690522	1.11491	0.136423	0.818836	1.38805	0.278603	3.03102	0.302501	5.68558	0.467364	0.756382	0.161562	0.912221	1.36511	0.829947	1.1527	0.383884	1.32477	0.397844	1.9741	0.463565
48:0e-TG	810.791	28.174	1.09401	0.748263	3.11728	ND	0.450617	ND	ND	ND	ND	0.395177	1.03704	2.32506	0.640652	0.672857	0.380147	0.796296	0.688102	0.682854	0.228395	1.08197	0.854327	1.19136	ND	ND	0.679012	ND	ND	ND	1.63736	0.918202	0.302469	0.497543	0.749532	0.360072	1.35802	0.701636	2.72092	0.839506	1.06033	2.10615	0.52711
48:1-TG	822.755	26.671	1.12734	0.609296	1.35184	0.74661	1.4081	1.36644	0.215027	0.147547	2.3338	0.983905	0.704799	1.43877	0.864191	1.18762	0.300297	0.768721	1.03124	0.202786	1.18271	0.93682	0.66408	0.96498	0.280192	0.333846	0.758248	1.07213	3.21895	1.10871	3.60742	0.435023	1.3216	0.412863	0.907101	0.907431	1.01572	0.717628	0.447615	0.523275	0.976389	1.57467	0.580891
48:0p-TG	808.775	27.539	1.26111	0.315504	0.580218	1.18805	0.946262	1.07248	0.418832	0.133339	1.39033	0.695028	1.43692	2.74738	0.579351	1.741	0.550968	0.576324	0.510197	0.155552	0.494548	0.642381	0.897106	1.11371	0.680455	0.518858	0.529595	1.0675	2.25282	1.71019	2.43855	0.86096	0.899533	0.235385	0.574144	0.53411	2.9595	0.585524	0.554566	0.463396	1.34656	2.22267	0.69571
48:2-TG	820.739	26.08	1.07521	0.730998	1.05151	ND	1.63445	ND	ND	ND	ND	1.46564	0.74254	1.06937	1.23836	1.61088	0.399099	0.867725	0.6766	0.272399	1.12518	0.624913	0.69711	0.730086	ND	ND	0.893489	ND	ND	ND	2.10525	0.435332	1.28209	0.45365	1.29474	0.519873	1.00856	1.16245	0.240384	0.664366	1.59424	2.65295	0.486756
48:2e-TG	806.76	27.111	1.40654	0.116714	0.979023	1.43968	1.24453	1.12699	0.450491	0.365374	0.142949	ND	0.766264	ND	ND	ND	ND	0.57323	ND	ND	1.22214	ND	ND	1.442	1.1534	0.701895	0.479816	1.24089	1.50268	1.87565	ND	ND	1.63215	ND	ND	ND	1.1786	ND	ND	0.482253	ND	ND	ND
48:3-TG	818.723	25.529	1.1683	0.539315	0.743889	0.734828	1.53308	1.84849	0.0964942	0.0496106	1.74169	1.57868	0.817253	1.12331	0.980799	0.918025	0.207255	1.16084	0.861622	0.23191	0.960897	1.12306	0.778701	0.695967	0.242939	0.700599	1.13743	0.447554	3.12616	0.626165	4.17048	0.34758	0.949568	0.302276	0.93082	1.05777	0.947728	0.820286	0.436846	1.05335	1.00015	1.9621	0.553814
48:4-TG	816.708	25.009	0.966154	0.886911	0.537247	1.8784	1.07201	2.73728	0.176637	0.150538	1.74481	2.4288	1.06014	0.362083	0.682847	0.795042	0.403731	1.51648	0.944214	0.218341	0.64516	0.728485	1.1212	0.745814	0.581946	0.923654	1.26222	0.476562	1.51982	0.453424	2.15818	0.453165	0.787865	0.362215	0.658059	3.25178	0.742235	0.587384	0.429635	1.63083	0.707423	ND	0.821256
48:5-TG	814.692	24.644	1.2346	0.582928	0.426138	0.629559	0.749881	1.83689	0.0881987	0.0568534	1.57066	3.36711	1.37524	0.610857	0.672109	0.7907	0.132241	1.36426	0.700136	0.163908	0.585143	1.01788	0.821842	1.15171	0.151243	0.813029	1.36862	0.252766	1.32829	0.357597	7.08476	0.572949	0.584335	0.227413	0.651834	1.31711	0.89863	0.527372	0.532867	1.49605	0.561379	1.77008	0.392367
50:1e-TG	836.807	28.115	1.03197	0.896019	1.06958	ND	0.679887	ND	ND	ND	ND	0.609831	1.48207	3.17604	0.687356	1.72539	0.629599	0.722725	0.669676	0.475819	0.447039	0.523571	0.873667	1.12002	ND	ND	0.757963	ND	ND	ND	1.65143	0.950319	0.813238	0.433043	0.668816	0.656449	2.21585	0.605747	1.01936	0.691633	1.05457	1.94454	0.644782
50:2-TG	848.77	26.661	1.09504	0.676743	1.37427	0.946773	1.3917	1.64233	0.304363	0.102921	2.60534	0.783546	0.774789	1.25118	1.06364	1.15495	0.323137	0.804925	0.588037	0.292098	1.09853	1.04995	0.5645	0.623151	0.228423	0.615855	0.972147	0.833686	3.27125	1.42625	2.53616	0.473508	1.12812	0.333305	1.0463	0.481333	1.03522	1.1938	0.572543	0.797144	0.893132	1.89857	0.523127
50:2e-TG	834.791	27.604	1.30308	0.210503	0.577866	1.62301	0.651413	0.919696	0.265042	0.0431866	0.764109	0.793092	1.40205	2.31113	0.544468	1.6911	0.381639	0.733131	0.560717	0.406809	0.489143	0.740655	1.54586	0.972449	1.89277	0.334027	0.816017	1.21785	1.24975	1.28659	1.92877	1.11411	0.642073	0.358586	0.483934	0.793953	3.03876	0.588774	0.651167	0.677095	1.24612	2.35461	0.908481
50:3-TG	846.755	26.147	1.0533	0.791411	1.13011	1.06068	1.34766	1.73995	0.220849	0.0766379	2.05441	1.08924	0.727197	1.14966	1.12519	0.931747	0.256487	1.00798	0.815423	0.531513	1.02022	1.39969	0.809811	0.585784	0.348512	0.278133	1.13211	0.660603	2.91296	1.07377	2.65228	0.458819	0.956045	0.365886	1.18484	0.747736	1.04697	0.902587	0.713365	1.04592	0.89938	1.92411	0.615712
50:3e-TG	832.775	27.031	1.49914	0.0660934	0.0732473	1.58092	0.390652	0.921561	0.139909	ND	ND	0.502717	1.43704	1.65869	0.55634	1.16485	0.0397875	0.551099	0.793156	0.420015	0.404604	0.742239	1.15408	0.990582	1.55733	0.524373	0.82316	0.819026	1.37404	1.91051	1.7629	1.643	0.25811	0.386243	0.607136	0.955542	2.36833	0.432446	0.670034	0.334845	1.2544	2.48336	0.945388
50:4-TG	844.739	25.648	1.04098	0.821514	0.774298	1.18839	1.30998	1.90897	0.0996957	0.0379143	1.42752	1.03516	0.666725	1.02633	1.11396	0.847774	0.193709	1.34742	1.07073	0.725507	0.920903	1.58806	1.32589	0.604151	0.390125	0.776605	1.23641	0.349646	2.14698	0.74091	1.77074	0.38284	0.828075	0.384985	1.03398	1.50974	1.01525	0.809619	0.778129	1.29677	0.976822	2.63218	0.727101
50:5-TG	842.723	25.118	1.13264	0.580053	0.628428	1.37889	1.11109	1.55586	0.0828816	0.0402236	1.8044	2.12787	0.778164	0.645455	0.805933	0.622659	0.146078	1.47818	0.814851	0.474951	0.719633	1.349	1.22535	0.768849	0.573152	0.7763	1.34945	0.395686	1.69982	0.719375	3.56631	0.439417	0.748594	0.356864	0.834653	1.77118	0.950303	0.583922	0.664578	1.4673	0.653995	2.3781	0.512253
50:6-TG	840.708	24.733	1.09827	0.779732	1.41664	0.56522	0.913432	2.18183	ND	0.0403439	1.23621	2.75827	1.54161	0.713389	0.730304	0.600872	0.122999	0.758987	0.81434	0.255235	0.648669	1.22721	1.00089	1.24155	0.313977	0.647385	0.981514	0.476388	1.23444	0.409828	6.47775	0.483771	0.725261	0.344084	0.649614	1.80303	1.02186	0.515475	0.661405	0.750477	0.75775	1.41736	0.474604
52:0-TG	880.833	28.425	1.24471	0.312584	2.08853	1.25447	1.09426	1.39065	0.516209	0.753585	1.21509	0.339062	0.78411	0.550756	0.583558	0.489976	0.0880269	0.625597	0.652097	0.983783	1.03477	2.1176	0.319382	0.941345	0.588166	0.766893	0.974313	0.664848	3.13428	1.62275	0.849812	0.32047	0.966832	0.424405	1.32081	0.99111	0.792747	2.45411	0.992836	0.697493	0.75147	2.5266	0.3372
52:1e-TG	864.838	28.781	0.962941	0.873349	ND	0.398564	ND	0.927248	0.514727	0.826216	1.01821	0.643593	ND	2.83776	0.623737	1.84176	1.38558	ND	0.963814	0.556635	ND	0.524347	1.19214	ND	ND	ND	ND	0.22173	1.3713	1.48851	1.10132	1.09235	ND	0.467369	0.643114	0.735847	ND	0.608021	1.09407	ND	0.820211	2.4139	0.687914
52:2-TG	876.801	27.22	1.05958	0.735243	1.45555	0.94225	1.28364	1.15552	0.468245	0.0933157	2.37147	0.825723	0.800693	1.23824	1.11426	1.14033	0.3243	0.840528	0.709714	0.626915	1.01156	1.3473	0.687158	0.569747	0.433369	0.540214	1.06315	0.796984	2.42307	1.83153	1.60879	0.566999	0.943916	0.424896	1.12319	0.655732	1.06456	1.07751	0.910896	0.966645	0.800911	2.1702	0.590969
52:2e-TG	862.822	28.076	1.04037	0.844279	0.868993	ND	0.732625	ND	ND	ND	ND	0.597337	1.60068	2.67781	0.675484	1.61319	0.654331	0.747672	0.792874	0.632391	0.630114	0.804953	0.685187	1.01382	ND	ND	0.649864	ND	ND	ND	1.16817	0.924987	0.899088	0.363346	0.725092	0.856491	2.07467	0.629693	1.26203	0.78247	1.0188	2.01018	0.90764
52:3-TG	874.786	26.711	1.03203	0.840764	1.17872	1.24726	1.28678	1.44536	0.473255	0.103367	2.13219	0.88186	0.769965	0.920004	1.10247	0.848681	0.256958	0.991106	0.797842	0.978322	0.941828	1.58191	0.755032	0.521705	0.639314	0.299359	1.28612	0.915132	2.2719	1.91821	1.47163	0.538344	0.684559	0.434872	1.20221	0.812277	1.06071	0.93976	1.13341	1.2785	0.723704	1.55647	0.618908
52:2p-TG	860.807	27.706	1.42353	0.30575	0.569302	2.32132	0.747907	2.58866	0.311358	ND	1.92541	0.319535	1.28744	0.681227	0.132965	0.694806	0.145727	1.00279	0.217823	0.169799	0.613953	0.318919	0.670019	0.8	1.98164	0.83576	0.814884	2.89535	4.90233	3.07534	0.587952	0.468738	0.664186	0.138625	0.167809	0.291464	2.46884	0.128432	0.251065	1.0307	0.433181	0.875	0.469747
52:4-TG	872.77	26.238	1.01611	0.918689	1.04239	1.51822	1.18774	1.43278	0.323364	0.0856072	1.74219	1.17477	0.691231	0.976896	0.883799	0.565395	0.196434	1.18289	0.885599	1.23952	0.893755	1.76024	1.06153	0.487459	0.85515	0.342178	1.49883	0.927887	1.67752	1.63622	2.00964	0.491381	0.561742	0.436535	1.02084	1.23825	1.0128	0.469186	1.14737	1.44117	0.661803	1.56981	0.669872
52:3p-TG	841.764	28.119	1.2224	0.443418	0.144745	ND	0.786658	ND	ND	ND	ND	0.442201	1.0258	3.01427	0.77211	1.53993	0.555274	1.1202	0.713669	0.491835	0.453115	0.593694	0.902157	0.843298	ND	ND	1.18313	ND	ND	ND	1.5505	0.906214	0.641913	0.467274	0.799212	0.723753	3.05223	0.656616	0.899134	0.748899	1.17346	2.08702	0.711685
52:5-TG	870.755	25.858	1.07461	0.777567	0.783765	1.78771	1.12235	1.99443	0.322368	0.113179	3.43097	0.512841	0.64373	0.584718	0.355626	0.379894	0.107399	1.22063	0.882967	0.891407	0.84304	1.31643	1.00636	0.576612	0.791244	0.852144	1.57281	0.980418	3.02387	2.60654	2.10643	0.296175	0.776021	0.312101	0.392297	1.44858	0.930593	0.252945	0.79658	1.53045	0.360785	0.790949	0.302653
52:6-TG	868.739	25.369	1.13613	0.617293	0.946955	1.16157	0.821314	1.66024	0.0720298	0.0328164	1.9439	2.32365	0.611644	1.02058	0.813279	0.711216	0.203683	1.46645	0.767025	0.560541	0.529324	1.22048	0.893437	0.505866	0.687172	0.624323	1.71251	0.492474	1.59579	0.811382	4.61696	0.429648	0.757842	0.361326	0.804805	1.22006	0.81192	0.550799	0.705686	1.83618	0.793013	1.3803	0.541807
52:7-TG	866.723	25.054	1.35058	0.375191	0.764736	ND	1.00872	ND	ND	ND	ND	2.73048	0.992597	0.879585	0.777543	0.768261	0.166986	1.04359	0.44945	0.104286	0.632481	0.994933	0.537365	0.983382	ND	ND	1.16632	ND	ND	ND	4.75118	0.530216	0.812486	0.246457	0.769864	0.511741	1.33994	0.699276	0.438679	1.25575	1.06983	2.0523	0.521563
54:0-TG	908.864	29.083	1.10647	0.670335	2.07767	0.669401	1.09615	1.02744	0.574894	0.675186	1.03315	ND	0.677236	ND	ND	ND	ND	0.578909	ND	ND	1.08451	ND	ND	1.40916	0.498622	0.751242	1.06356	0.691286	2.06076	2.01802	ND	ND	0.5568	ND	ND	ND	0.659491	ND	ND	0.796509	ND	ND	ND
54:2-TG	904.833	27.751	1.05143	0.793354	1.18089	0.860705	1.37596	1.16283	0.277743	0.0546091	2.64811	0.953843	0.878041	1.27616	1.08559	1.20403	0.396688	0.94315	0.754261	0.578321	1.06404	1.07858	0.73825	0.720399	0.529106	0.504745	1.16983	0.719636	2.03173	1.6801	0.964674	0.563344	0.732384	0.410542	1.18492	0.700467	0.95016	1.05672	0.986891	0.985152	0.675547	3.20566	0.716192
54:1p-TG	890.854	28.728	0.967813	0.8694	1.24349	ND	0.59572	ND	ND	ND	ND	0.513618	1.67727	1.90908	0.775074	1.97279	1.04457	0.613071	0.76402	0.537984	0.618855	0.879353	1.09213	0.890688	ND	ND	0.665124	ND	ND	ND	0.858196	1.06842	0.92539	0.31693	0.745072	0.902251	2.13418	0.660308	0.97294	0.636206	0.7282	2.41509	0.843973
54:3-TG	902.817	27.242	1.16625	0.513655	1.03048	1.46138	1.52422	2.28449	0.437323	0.0608912	2.2177	0.496532	0.83981	1.06741	0.971455	0.49334	0.173579	1.04523	0.409831	0.679052	0.787371	1.16783	0.359454	0.607708	0.656821	1.09512	1.27126	0.717705	3.51488	2.62528	0.720798	0.409513	0.602231	0.309773	0.901379	0.495196	0.924236	1.0315	1.1034	1.36745	0.541341	2.22036	0.376649
54:2p-TG	888.838	28.086	1.12376	0.475258	0.940048	ND	0.757794	ND	ND	ND	ND	0.552054	1.49161	1.7684	0.71851	1.36394	0.643666	0.935252	0.857368	0.732648	0.378897	1.09645	0.921117	0.844125	ND	ND	0.743405	ND	ND	ND	1.05832	1.00393	0.896882	0.566593	0.74161	1.34383	2.17746	0.446816	1.18719	0.834532	0.878683	2.01775	1.10114
54:4-TG	900.801	26.778	1.23665	0.323749	1.01094	ND	1.41716	ND	ND	ND	ND	0.684465	0.741708	0.922837	0.905471	0.604128	0.186954	1.09723	0.845831	1.14118	0.808202	1.73178	0.375328	0.556501	ND	ND	1.42914	ND	ND	ND	0.952058	0.652635	0.507531	0.448874	1.42718	0.992035	0.817657	1.09999	1.93946	1.61394	0.514427	3.00818	0.567187
54:4e-TG	886.822	27.567	1.30448	0.159351	ND	1.14509	ND	0.501617	ND	ND	0.870142	0.346079	ND	1.47884	0.663962	0.974738	0.364229	ND	0.77562	0.955006	ND	1.07591	1.11258	ND	1.13766	0.868296	ND	1.1038	2.58919	1.76852	1.2809	0.797855	ND	0.324942	0.625126	1.5836	ND	0.499569	1.00454	ND	0.68491	1.56722	0.90005
54:5-TG	898.786	26.213	1.08878	0.623941	0.840238	1.90121	1.30491	1.41735	0.255964	0.0490192	1.84917	0.820277	0.760048	0.773561	0.851231	0.518456	0.15054	1.14174	0.885388	1.40938	0.827031	1.55612	0.860987	0.636441	0.901512	0.662893	1.38268	0.588983	2.05653	1.48426	1.43828	0.374856	0.800423	0.570021	0.900825	1.5725	0.838199	0.564698	1.28389	1.46829	0.48223	2.30036	0.519503
54:6-TG	896.77	26.025	1.16329	0.434039	0.82266	ND	1.08785	ND	ND	ND	ND	1.12567	0.672192	1.07356	0.947683	0.779109	0.253014	1.30379	0.860871	0.899466	0.716781	1.52038	0.846603	0.632775	ND	ND	1.61775	ND	ND	ND	3.11054	0.597254	0.666087	0.493116	0.854766	1.22972	0.878581	0.751803	1.13034	1.60153	0.76657	1.0567	0.702831
54:7-TG	894.755	25.69	1.10479	0.674627	1.28838	0.986754	1.28708	2.56065	0.177677	0.0507814	2.17011	1.94195	0.791102	0.986674	0.885972	0.838864	0.20923	0.716151	0.450772	0.266863	0.870126	1.06497	0.486915	0.889287	0.378517	0.673631	0.763394	0.829768	2.21572	1.08096	3.72879	0.554146	1.11884	0.271702	0.885002	0.495284	1.41053	0.785825	0.602841	0.865107	0.975017	1.85069	0.593912
56:0-TG	936.895	29.822	1.13103	0.81543	ND	0.774703	ND	3.97701	2.7921	2.57614	1.14915	0.0731332	ND	0.150433	0.149137	0.177596	0.0200822	ND	0.322963	0.301748	ND	0.604404	0.0427852	ND	0.690103	1.95078	ND	0.745768	4.36234	4.97315	0.265156	0.0965682	ND	0.13742	0.377605	0.309804	ND	0.631721	0.327645	ND	0.192839	0.735533	0.0921799
56:1-TG	934.88	28.275	0.973382	0.941668	3.03585	0.862322	0.866207	1.18889	0.344597	0.219655	2.02295	ND	0.366732	ND	ND	ND	ND	0.650967	ND	ND	0.576721	ND	ND	2.19064	0.45178	0.373395	0.833958	0.938503	2.36096	1.23695	ND	ND	0.40498	ND	ND	ND	0.376481	ND	ND	0.697465	ND	ND	ND
56:2-TG	932.864	28.292	1.41148	0.463336	1.35821	0.639134	1.45997	0.177088	0.0589073	0.484131	0.0310648	1.08018	0.808938	1.70483	1.27678	1.52841	0.497596	0.800654	0.830222	0.514017	0.798079	0.850734	0.790376	1.81143	0.0184646	0.145162	1.08646	0.108115	0.433261	0.965531	0.85211	0.57011	0.563883	0.354544	1.28805	0.826957	0.641239	0.960864	1.25772	0.67113	0.797005	9.34448	0.614156
56:1p-TG	918.885	29.368	0.991944	0.971419	1.43426	ND	0.621514	ND	ND	ND	ND	0.449301	1.20319	1.46283	1.21601	2.06512	0.860535	1.04382	0.449491	0.488485	0.98008	0.841969	0.94198	0.685259	ND	ND	0.374502	ND	ND	ND	0.427057	1.32551	1.05179	0.287646	1.14406	0.778196	2.23904	0.900823	0.890417	0.366534	0.779301	2.95068	0.740588
56:3-TG	930.848	27.723	1.44871	0.196571	0.980439	0.750849	1.402	1.02733	0.121894	0.0333096	1.57925	0.771977	0.847035	1.22481	0.959065	0.84027	0.268336	1.219	0.576916	0.43973	0.76267	0.999271	0.641662	1.17667	1.06212	0.544643	1.15802	0.411267	1.84041	4.05066	0.700742	0.415363	0.547556	0.270255	1.06313	0.498853	0.820265	0.978901	1.14969	1.08634	0.655216	4.66214	0.461938
56:3e-TG	916.869	28.703	0.96084	0.784454	1.16996	ND	0.711462	ND	ND	ND	ND	0.473927	1.34387	1.3011	1.16079	1.60536	0.63669	1.21739	0.596492	0.792696	1.05138	1.13925	1.41427	0.56917	ND	ND	0.466403	ND	ND	ND	0.904622	1.19263	0.924901	0.997799	1.21626	1.30234	2.06324	0.603975	0.649574	0.482213	0.868566	1.66395	1.13971
56:4-TG	928.833	27.177	1.11316	0.574175	0.716814	ND	1.23476	ND	ND	ND	ND	0.705287	0.674531	1.26042	0.984787	0.63198	0.200655	1.29257	0.814688	1.093	1.1951	1.71265	0.708603	0.984203	ND	ND	1.19213	ND	ND	ND	0.780976	0.578922	0.852208	0.414822	1.2059	0.72103	0.787693	1.06676	1.81644	1.06999	0.843955	2.89101	0.568117
56:4e-TG	914.854	28.11	1.37839	0.149932	0.832347	ND	0.477318	ND	ND	ND	ND	0.566551	1.2426	1.00351	1.01479	1.09817	0.371319	0.524655	0.745253	0.861533	0.280079	1.21413	1.47618	1.64497	ND	ND	0.698225	ND	ND	ND	1.4747	0.991934	0.374753	0.276146	1.04388	1.70443	3.0572	0.417521	0.671778	0.86785	0.865156	1.94429	1.25874
56:5-TG	926.817	26.986	1.03859	0.862017	1.12929	1.2879	1.31627	1.9649	0.248663	0.0471018	3.43091	1.09869	0.843516	1.09865	0.87008	0.839814	0.232552	0.948955	0.552203	0.356991	1.04774	0.827743	0.489329	0.66146	0.536797	0.952829	1.15097	0.770216	2.60812	1.94961	2.03561	0.466463	0.835879	0.331969	1.01545	0.550999	0.980242	1.00729	1.05679	1.08568	0.538344	1.34786	0.486116
56:6-TG	924.801	26.514	1.05877	0.736532	1.115	1.18171	1.15994	2.01335	0.257512	0.035822	2.56543	0.529736	0.847175	1.19312	1.10012	0.867161	0.270193	1.04824	0.631864	0.819058	0.82581	1.18286	0.799989	0.686419	0.628931	0.939107	1.12631	0.851619	2.17129	1.57838	1.69428	0.541676	0.862169	0.420301	1.10679	0.552753	1.02177	0.846802	1.29405	1.30716	0.707281	1.55469	0.664133
56:7-TG	922.786	26.285	1.03923	0.823987	1.17163	1.22159	1.17626	2.22219	0.376395	0.0688405	1.96986	1.55501	0.93332	1.24141	0.922178	1.03742	0.269397	0.79306	0.455122	0.405412	0.951278	1.39065	0.46432	0.726773	0.461446	0.776475	0.88955	0.874883	1.88491	1.76604	1.5107	0.690776	0.958498	0.284341	0.992694	0.384565	1.44605	1.0882	1.08032	0.953585	0.879464	2.12275	0.602631
56:8-TG	920.77	25.777	1.05108	0.777787	1.32647	1.17171	1.06715	1.98213	0.205914	0.0570147	1.73199	1.91908	0.901841	1.08004	1.01064	0.69656	0.187666	0.88035	0.539091	0.687825	0.85744	1.52458	0.687483	0.738052	0.735337	0.960657	1.00633	0.581723	1.30824	1.3482	2.81304	0.625334	0.705709	0.354695	0.975895	0.698527	1.44358	0.650192	1.13128	1.07308	0.848908	1.76273	0.723523
56:9-TG	918.755	25.181	1.05522	0.805856	1.03072	2.02756	0.948005	1.58685	0.104015	0.022098	1.90459	2.44965	0.76005	0.824585	0.939387	0.556828	0.159871	1.09293	0.374852	0.69638	0.669806	1.57335	0.755272	0.839852	0.48494	0.690823	1.21443	0.595538	1.06357	1.16679	3.46819	0.717929	0.587725	0.406972	1.04173	1.05006	1.41397	0.442623	0.804975	1.44251	0.770604	1.79313	0.526847
58:10-TG	944.77	25.3	1.18768	0.389282	1.19994	2.01302	0.816119	1.13734	0.14238	0.0199553	1.52259	1.6984	0.886854	0.91209	0.843673	0.405027	0.142786	1.24494	0.469631	1.06426	0.581091	1.31183	0.919957	0.805505	1.17071	0.560866	1.16754	0.815367	0.712412	2.02188	3.18318	0.585456	0.473252	0.639285	0.93101	1.34375	1.17543	0.329595	1.06997	1.64934	0.623726	1.90795	0.501882
58:11-TG	942.755	24.791	1.31126	0.319886	1.25369	2.05758	0.783395	1.00133	0.119552	0.0366645	1.58605	2.58427	0.946041	0.571198	0.525342	0.266141	0.0645177	1.04485	0.311966	0.6961	0.470615	1.06203	1.00333	1.01213	1.89258	0.545808	0.960157	0.666864	0.49305	2.67589	4.22044	0.498661	0.703837	0.526876	0.497847	1.45505	1.49333	0.198211	0.579182	1.33196	0.545061	1.93276	0.385647
58:2-TG	960.895	28.892	1.22497	0.58574	1.82735	1.86633	0.939302	2.42109	0.908219	0.209645	3.88098	0.276277	0.561275	0.628384	0.402455	0.419801	0.157689	0.874375	0.301687	0.146173	0.712058	0.238983	0.262647	2.42792	0.924914	1.15442	0.803041	1.35966	5.03306	3.45322	0.197921	0.146339	0.641152	0.138137	0.449158	0.260662	0.581351	0.239703	0.514941	0.632181	0.263032	2.58909	0.155392
58:2e-TG	946.916	30.115	1.06112	0.765616	0.93845	ND	ND	ND	ND	ND	ND	0.319711	0.903693	2.14101	1.31375	1.64821	0.768987	1.08907	0.659834	0.586407	0.729906	0.781187	0.720464	0.654598	ND	ND	ND	ND	ND	ND	1.45982	1.26966	0.764663	0.445603	1.53555	0.401298	1.84214	0.750611	0.949138	1.07748	0.612739	2.09155	0.544476
58:3-TG	958.88	28.249	1.74139	0.391587	1.43737	0.590518	1.12613	0.143132	0.0461889	0.494087	0.801777	0.873152	1.17116	1.18817	0.849347	0.913194	0.345941	0.978442	0.647749	0.295112	0.631163	0.72734	0.506173	2.07723	0.0368681	0.139683	0.817706	0.060278	1.56722	0.559971	0.559719	0.325042	0.453596	0.205877	0.887298	0.514629	0.553459	0.570157	1.23941	0.753748	0.846852	12.602	0.46316
58:4-TG	956.864	27.743	1.65561	0.401908	0.871543	ND	1.21798	ND	ND	ND	ND	0.746262	1.00241	0.970346	0.646041	0.620488	0.205921	1.27369	0.492704	0.337865	0.774632	0.782194	0.512616	1.74935	ND	ND	1.02581	ND	ND	ND	0.516261	0.306709	0.518509	0.194005	0.745106	0.404924	0.619046	0.505248	1.06139	0.947028	0.659147	8.96271	0.330062
58:5-TG	954.848	27.339	1.06177	0.750212	0.635433	ND	1.45261	ND	ND	ND	ND	1.05696	0.568846	1.33085	1.35225	1.10111	0.344239	1.19426	0.605688	0.280727	1.3039	1.59765	0.742001	0.934291	ND	ND	1.28127	ND	ND	ND	1.22276	0.555749	0.726989	0.386484	1.53465	0.492704	0.882531	0.846034	1.64788	1.01987	0.766625	2.57136	0.564286
58:6-TG	952.833	26.924	1.10016	0.576602	0.67459	ND	1.27021	ND	ND	ND	ND	1.34208	0.593762	1.14138	1.25301	1.01798	0.258922	1.01098	0.58036	0.58058	1.13099	1.60529	0.850308	1.03673	ND	ND	1.18949	ND	ND	ND	1.37254	0.545002	0.850279	0.355001	1.34703	0.649498	1.05278	0.733847	1.4524	1.19019	0.751525	2.52155	0.641698
58:7-TG	950.817	26.676	1.09399	0.56125	1.0114	ND	1.16795	ND	ND	ND	ND	1.52998	0.700295	1.08315	1.19795	1.19751	0.285727	1.03872	0.616187	0.535615	0.871071	1.55498	0.56041	0.974683	ND	ND	1.19613	ND	ND	ND	1.61293	0.832174	0.569573	0.348188	1.22056	0.627592	1.15267	1.1525	1.81969	1.31751	0.703174	1.61611	0.505571
58:8-TG	948.801	26.29	1.09709	0.604638	1.28209	1.42736	1.06686	2.11662	0.352451	0.0294585	1.96682	1.31859	1.03399	1.13895	1.16145	0.715207	0.227517	0.953964	0.275689	0.458254	0.735175	1.50575	0.33265	0.953539	0.780657	0.944212	0.868997	0.711382	1.63753	2.32088	1.0837	0.76003	0.72551	0.366079	1.30812	0.324778	1.10839	1.01771	1.15369	1.27147	0.808219	2.1693	0.586952
58:9-TG	946.786	25.799	1.09998	0.591536	1.36387	ND	1.03939	ND	ND	ND	ND	1.64257	1.07455	1.14876	1.09117	0.598726	0.202479	0.976307	0.484209	0.815047	0.684733	1.50412	0.685657	0.83002	ND	ND	0.966717	ND	ND	ND	2.42818	0.740626	0.639983	0.498943	1.18209	0.795423	1.03664	0.553491	1.35785	1.3878	0.773393	1.87756	0.619708
60:1-TG	990.942	30.575	0.97694	0.938106	ND	1.56571	ND	2.9365	1.15979	0.639882	2.64381	0.0786634	ND	0.96977	0.859852	0.390921	0.205621	ND	1.1881	0.644693	ND	0.602239	0.283431	ND	0.307739	1.85166	ND	1.82187	2.56941	1.66175	0.127077	0.431221	ND	0.503291	1.00875	0.626348	ND	0.531366	1.35463	ND	0.478868	1.28977	0.267243
60:10-TG	972.801	26.025	1.02722	0.88148	1.63006	0.879521	0.948802	1.99922	0.209767	0.0336462	2.32568	1.78061	0.951717	1.12565	1.15517	0.849689	0.229663	0.898832	0.351165	0.433088	0.74809	1.62794	0.560116	0.935476	0.503419	1.34439	0.858648	0.692823	1.1842	2.11683	1.96368	0.814812	0.852193	0.418808	1.11587	0.546532	1.00377	0.915747	1.45654	1.17242	0.599377	1.17673	0.589317
60:11-TG	970.786	25.586	1.1004	0.653849	1.99228	ND	0.613219	ND	ND	ND	ND	2.24747	1.20912	1.0733	1.16263	0.688391	0.201781	0.630535	0.291172	0.601526	0.363133	1.70602	0.528248	1.16361	ND	ND	0.599367	ND	ND	ND	2.20838	0.809079	1.07579	0.438377	1.25715	0.743784	1.41246	0.616091	1.48307	0.940484	0.819827	1.48333	0.640366
60:12-TG	968.77	25.345	1.04067	0.886563	1.50487	ND	1.03203	ND	ND	ND	ND	3.05878	0.807712	0.734012	0.839512	0.596462	0.175839	0.756544	0.269194	0.302181	0.978574	2.23959	0.416248	0.704007	ND	ND	0.847458	ND	ND	ND	2.47127	0.584754	0.537713	0.256419	0.816999	0.322334	1.81735	0.575636	1.38192	1.01375	0.913525	2.25843	0.7869
60:13-TG	966.755	24.738	1.28693	0.440321	1.39349	ND	0.664588	ND	ND	ND	ND	3.1167	0.869226	0.737246	0.980795	0.450072	0.116663	0.812707	0.178368	0.269321	0.362502	1.79746	0.441621	1.32528	ND	ND	0.483337	ND	ND	ND	3.46163	1.02721	0.401481	0.233068	0.806386	0.354724	2.58234	0.450619	0.870993	1.10505	1.02191	2.09378	0.591448
60:1p-TG	947.712	24.832	1.05932	0.812853	2.2308	ND	0.908678	ND	ND	ND	ND	1.29912	0.581554	1.47219	0.776903	0.343487	0.144806	0.881418	0.278723	1.12878	0.595184	1.77418	1.16739	1.90822	ND	ND	0.736029	ND	ND	ND	2.64577	0.958395	0.590641	0.568574	1.00684	0.313228	0.872331	0.361926	1.43889	0.695139	0.559973	2.18814	0.572679
60:2-TG	988.927	29.559	1.1101	0.782732	1.72223	1.88305	0.963562	2.38863	0.543142	0.202411	5.05367	0.211569	0.578137	0.716369	0.495771	0.292364	0.138478	1.1009	0.276537	0.167996	0.633514	0.347527	0.268675	2.10876	1.1299	1.12313	1.0433	1.21158	3.74496	3.71219	0.0983411	0.181818	0.476243	0.135216	0.541985	0.156908	0.624654	0.2451	0.489528	0.748699	0.236219	2.88999	0.116934
60:3-TG	986.911	28.854	1.04043	0.922879	1.34573	3.15341	0.971849	0.223197	0.0855885	1.84657	3.78217	0.461512	0.73903	1.04784	0.662197	0.574583	0.22478	1.31577	0.445981	0.247699	0.606704	0.453459	0.426004	1.99738	0.0643588	0.165789	0.964983	0.0920125	4.88998	1.0415	0.206763	0.23422	0.481868	0.186717	0.749946	0.351453	0.686599	0.345631	0.819255	0.890082	0.477995	5.51953	0.21987
60:4-TG	984.895	28.274	1.38429	0.460351	1.00644	ND	0.981081	ND	ND	ND	ND	0.683933	0.694363	1.26631	0.892217	0.746717	0.25985	1.62278	0.705583	0.416253	0.68006	0.91438	0.808664	1.6865	ND	ND	1.08966	ND	ND	ND	0.621208	0.322271	0.46811	0.249434	0.907948	0.661279	0.686561	0.440646	1.20937	1.08445	0.72448	6.77415	0.395308
60:5-TG	982.88	27.824	1.44527	0.251571	1.61842	1.01255	1.0307	0.526647	0.0392596	0.0397349	2.03042	0.618129	0.539474	1.19944	0.975452	0.708256	0.258452	1.14912	0.559014	0.406013	0.732456	1.2892	0.73524	2.05263	1.80072	0.565812	0.671053	0.548611	1.12029	5.61043	0.613492	0.411894	0.811404	0.357077	1.03909	0.563206	0.723684	0.494069	1.18254	0.671053	0.600704	3.42024	0.274027
60:6-TG	980.864	27.45	1.19286	0.434169	0.709177	0.788331	1.30443	1.17492	0.0440381	0.0285955	2.14383	0.893466	0.545628	1.41946	1.27275	1.08337	0.31616	1.27251	0.534551	0.334441	1.13412	1.70311	0.58705	1.34893	0.990738	0.744578	1.14437	0.640397	1.39746	4.07286	0.959271	0.547874	0.670969	0.380063	1.18058	0.456609	0.856417	0.641046	1.61336	1.01344	0.640824	1.86788	0.542385
60:7-TG	978.848	27.04	1.04686	0.789677	0.67654	ND	1.37243	ND	ND	ND	ND	1.10334	0.517595	1.52652	1.35405	1.18044	0.321611	1.08915	0.543138	0.405864	1.03343	1.81008	0.734478	1.31906	ND	ND	1.13812	ND	ND	ND	1.16032	0.624746	0.687683	0.368756	1.49003	0.573219	0.98915	0.837821	1.73959	1.17683	0.725615	1.94698	0.553405
60:8-TG	976.833	26.585	1.15146	0.401336	1.09978	1.20531	0.993687	1.10553	0.0961433	0.0254861	0.881493	1.28525	0.57716	1.3747	1.50659	1.01126	0.262772	1.14722	0.585656	0.639421	0.78449	2.32885	0.719807	1.22194	1.05249	0.721389	1.22156	0.325431	1.44452	1.2751	1.2008	0.765039	0.505809	0.416539	1.59419	0.752521	1.00714	0.917485	2.11531	1.44122	0.71395	2.04953	0.627444
60:9-TG	974.817	26.427	1.01302	0.943353	1.1821	ND	0.905611	ND	ND	ND	ND	1.61822	0.829337	1.7386	1.01691	1.18875	0.300653	1.14468	0.392578	0.398419	0.749932	1.77761	0.662984	1.0963	ND	ND	1.12362	ND	ND	ND	2.07848	0.543222	0.751925	0.432093	1.01635	0.507121	0.944886	1.23892	1.76277	1.27161	0.445949	1.29074	0.589637
62:11-TG	998.817	25.903	0.975849	0.898318	1.91414	ND	0.835278	ND	ND	ND	ND	1.66741	0.800747	1.15578	1.25834	1.01547	0.210634	0.585161	0.317839	0.536261	0.925805	2.35132	0.602918	1.34764	ND	ND	0.724218	ND	ND	ND	1.65709	0.936539	0.740084	0.422414	1.26987	1.01104	1.16006	0.632472	1.59882	0.966869	0.705352	1.0226	0.627837
62:12-TG	996.801	25.679	1.08779	0.710793	1.82869	1.28252	0.947566	2.39865	0.284919	0.0148844	2.45144	1.50366	0.956233	0.759492	0.851242	0.701074	0.144971	0.661563	0.257764	0.259369	0.879676	1.61088	0.386883	1.17146	0.430187	2.35292	0.652896	0.735978	1.56764	3.02954	1.38728	0.588832	1.01546	0.31692	1.21909	0.238742	1.00823	0.634551	1.15711	0.878232	0.632416	1.23305	0.567991
62:13-TG	994.786	25.346	1.1459	0.521856	1.73419	1.24733	0.702885	0.912008	0.131338	ND	0.975425	2.08159	1.17352	0.888251	1.31113	0.56302	0.151058	0.811336	0.213653	0.551989	0.522816	2.25757	0.487235	0.853284	0.440225	0.902508	0.696746	0.493479	0.386083	2.54691	2.59864	1.19334	0.509515	0.413495	1.30264	0.441643	1.57049	0.582919	1.62907	1.42521	0.845796	1.69012	0.761529
62:14-TG	992.77	24.826	1.29329	0.321821	1.61383	1.59349	0.572956	1.12266	0.155471	0.0145303	1.36353	2.31838	1.19557	0.757347	0.948166	0.334831	0.0937467	0.962567	0.171523	0.506836	0.548128	1.71851	0.52385	0.849885	1.12681	0.78744	0.565317	0.987565	0.409714	3.59171	3.63923	0.883339	0.52521	0.351986	0.926049	0.853042	1.76471	0.259647	0.981965	1.40183	0.759308	1.19603	0.623286
62:3-TG	1014.94	29.481	1.168	0.699349	1.70306	2.41019	1.08297	1.53228	0.130964	0	3.07614	0.507969	1.10917	0.527492	0.380363	0.37541	0.36825	1.33624	0.469364	0.345388	0.384279	0.272371	0.583931	2.01747	3.88279	0.923809	0.724891	0.651611	1.67623	5.93721	0.0834617	0.192622	0.349345	0.340144	0.448616	0.643541	0.593886	0.176525	0.533082	0.69869	0.325528	0	0.204719
62:5-TG	1010.91	28.273	1.15944	0.556369	1.26787	ND	0.930672	ND	ND	ND	ND	0.566598	0.701376	1.34577	1.12696	1.39385	0.276748	1.30564	0.58771	0.488925	1.04127	0.857129	1.04288	1.76963	ND	ND	0.695981	ND	ND	ND	0.752252	0.966625	0.728352	0.330637	1.20399	0.987569	0.949555	0.847082	0.952126	0.609657	0.678542	4.01882	0.5758
62:9-TG	1002.85	26.853	1.25809	0.393625	0.475477	0.753272	0.991647	1.23659	0.0314204	0.0105553	1.85869	1.23098	0.865282	1.3054	1.07014	0.971192	0.302868	1.34933	0.251019	0.340354	0.993789	2.20403	0.537164	1.5635	0.444493	0.684701	1.19512	0.467881	1.05551	4.64224	1.1159	0.614668	0.454059	0.329259	1.15379	0.310239	0.848147	0.680109	1.62052	1.26365	0.548816	2.71838	0.509824
62:10-TG	1028.86	27.019	1.0035	0.991874	0.869118	ND	1.04963	ND	ND	ND	ND	0.683285	0.718951	0.58026	0.70401	0.747889	0.139059	1.06557	0.621984	0.194253	0.999743	4.49566	1.10614	1.29391	ND	ND	1.18179	ND	ND	ND	0.827739	0.557514	0.774492	0.447133	0.801883	ND	0.926716	0.384563	2.9234	1.12008	0.28154	2.01732	0.486368
*ND = not detected
*LPC =lysophosphatidylcholine, PC = phosphatidylcholine, LPE = lysophosphatidylethanolamine, PE = phosphatidylethanolamine, dMePE = dimethylphosphatidylethanolamine, LPA = lysophosphatidic acid, LPI = lysophosphatidylinositol, PI = phosphatidylinositol, Cer = ceramide, Hex1Cer = monohexosylceramide, Hex2Cer = dihexosylceramide, Hex3Cer = trihexosylceramide, SM = sphingomyelin, GM3 = sialyl-lactos…
